# Supplementary material for: Magnesium–halobenzene bonding: mapping the halogen sigma-hole with a Lewis-acidic complex
Source: PubMed Central journal article supplement — Chem Sci. 2020 Dec 16;12(7):2410–8. doi: 10.1039/d0sc06321e (PMC8179342; doi:10.1039/d0sc06321e), 2020-12-16
Supplement: SC-012-D0SC06321E-s001.pdf [file SC-012-D0SC06321E-s001.pdf]

# SUPPORTING INFORMATION

## Contents

|                                                                                                                                            |            |
|--------------------------------------------------------------------------------------------------------------------------------------------|------------|
| <b>1. Supporting Experimental data</b>                                                                                                     | <b>S2</b>  |
| <b>1.1 NMR spectra of synthesized compounds</b>                                                                                            | <b>S2</b>  |
| 1.1.1 Spectra of [( <sup>Me</sup> BDI)Mg <sup>+</sup> ·PhF][B(C <sub>6</sub> F <sub>5</sub> ) <sub>4</sub> <sup>-</sup> ]                  | S2         |
| 1.1.2 Spectra of [( <sup>tBu</sup> BDI)Mg <sup>+</sup> ·(PhF) <sub>2</sub> ][B(C <sub>6</sub> F <sub>5</sub> ) <sub>4</sub> <sup>-</sup> ] | S4         |
| 1.1.3 Spectra of [( <sup>tBu</sup> BDI)Mg <sup>+</sup> ·(PhF) <sub>2</sub> ][Al-F-Al <sup>-</sup> ]                                        | S6         |
| 1.1.4 Spectra of [( <sup>tBu</sup> BDI)Mg <sup>+</sup> ·PhBr][B(C <sub>6</sub> F <sub>5</sub> ) <sub>4</sub> <sup>-</sup> ]                | S9         |
| 1.1.5 Spectra of [( <sup>tBu</sup> BDI)Mg <sup>+</sup> ·PhI][B(C <sub>6</sub> F <sub>5</sub> ) <sub>4</sub> <sup>-</sup> ]                 | S11        |
| <b>1.2 Single crystal X-ray diffraction</b>                                                                                                | <b>S14</b> |
| <b>1.3 Literature known metal-halobenzene complexes</b>                                                                                    | <b>S20</b> |
| <b>1.4 Computational details</b>                                                                                                           | <b>S21</b> |
| 1.4.1 Calculated structures (bond length, angles and energies)                                                                             | S21        |
| 1.4.2 X-Y-Z files                                                                                                                          | S26        |
| <b>2. References</b>                                                                                                                       | <b>S60</b> |

# 1. Supporting Experimental data

## 1.1. NMR spectra of synthesized compounds

### 1.1.1. Spectra of $[(^{\text{Me}}\text{BDI})\text{Mg}^+\cdot\text{PhF}][\text{B}(\text{C}_6\text{F}_5)_4^-]$

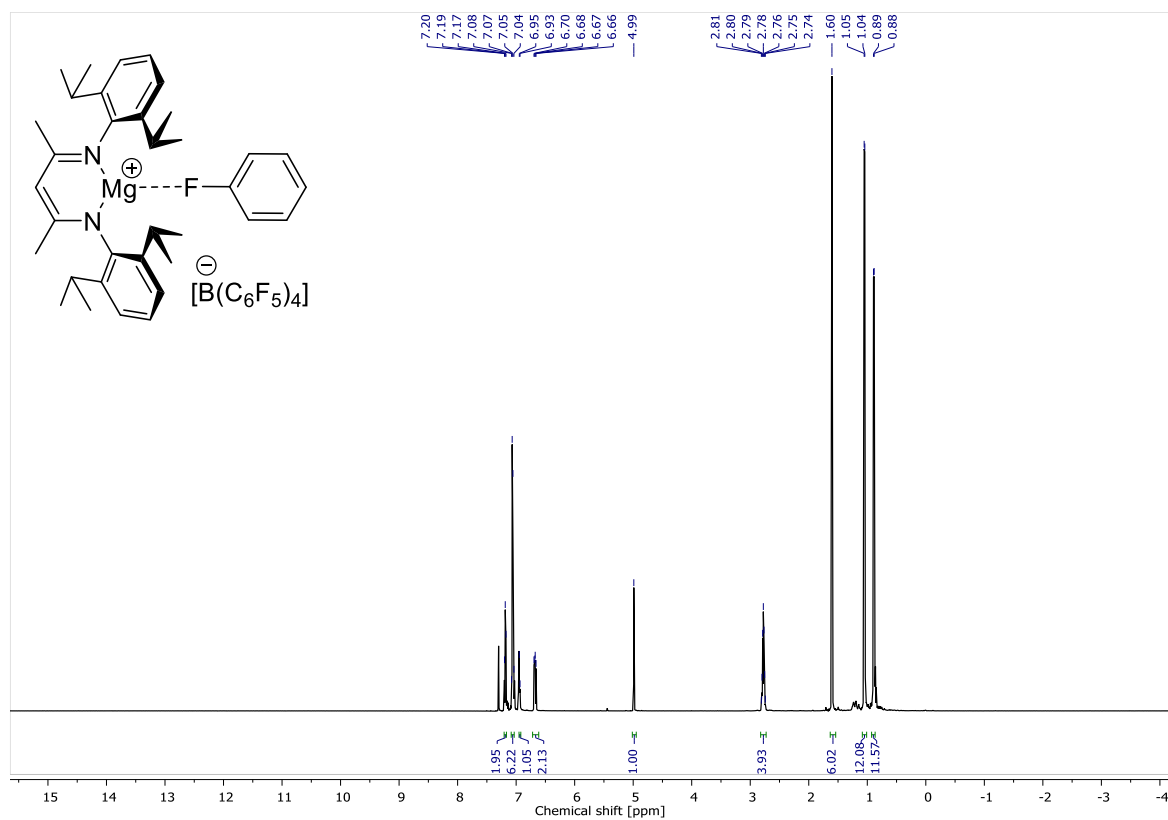

Figure S1:  $^1\text{H}$  NMR spectrum of  $[(^{\text{Me}}\text{BDI})\text{Mg}^+\cdot\text{PhF}][\text{B}(\text{C}_6\text{F}_5)_4^-]$  in  $\text{C}_6\text{D}_5\text{Br}$ .

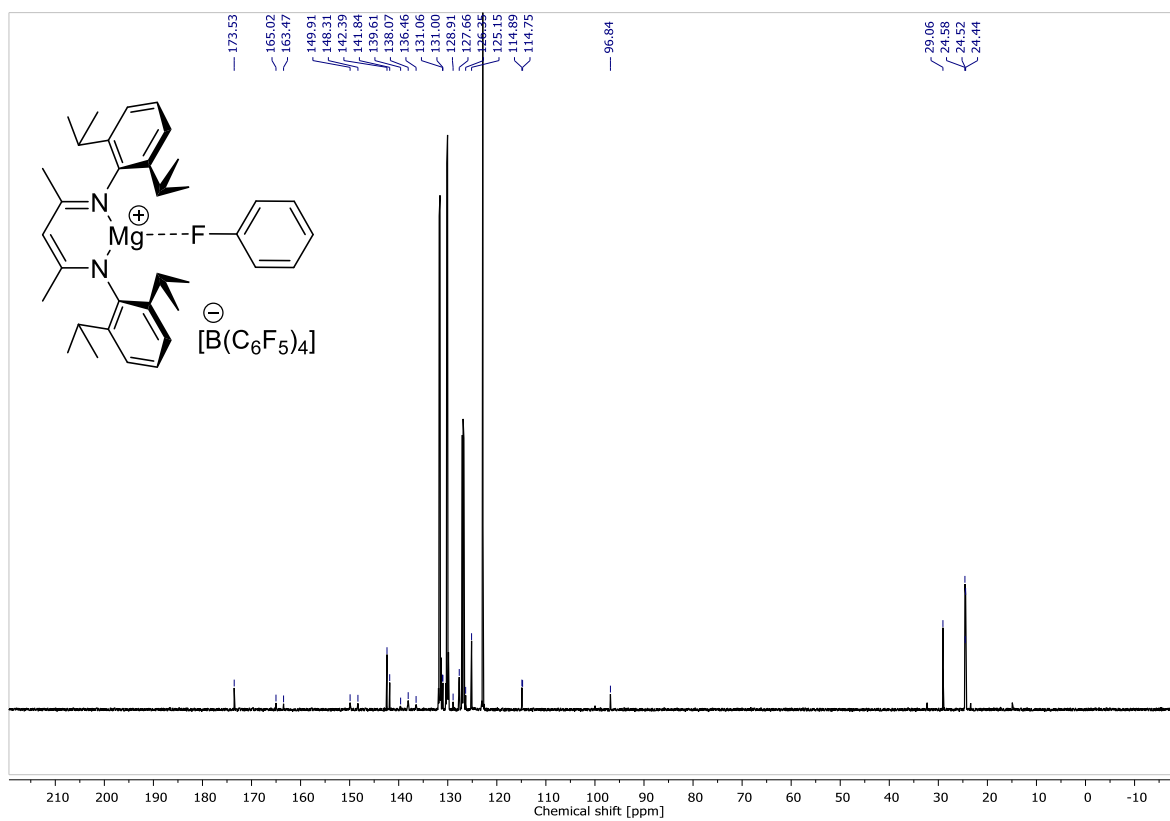

**Figure S2:**  $^{13}\text{C}\{^1\text{H}\}$  NMR spectrum of  $[(\text{MeBDI})\text{Mg}^+\cdot\text{PhF}][\text{B}(\text{C}_6\text{F}_5)_4^-]$  in  $\text{C}_6\text{D}_5\text{Br}$ .

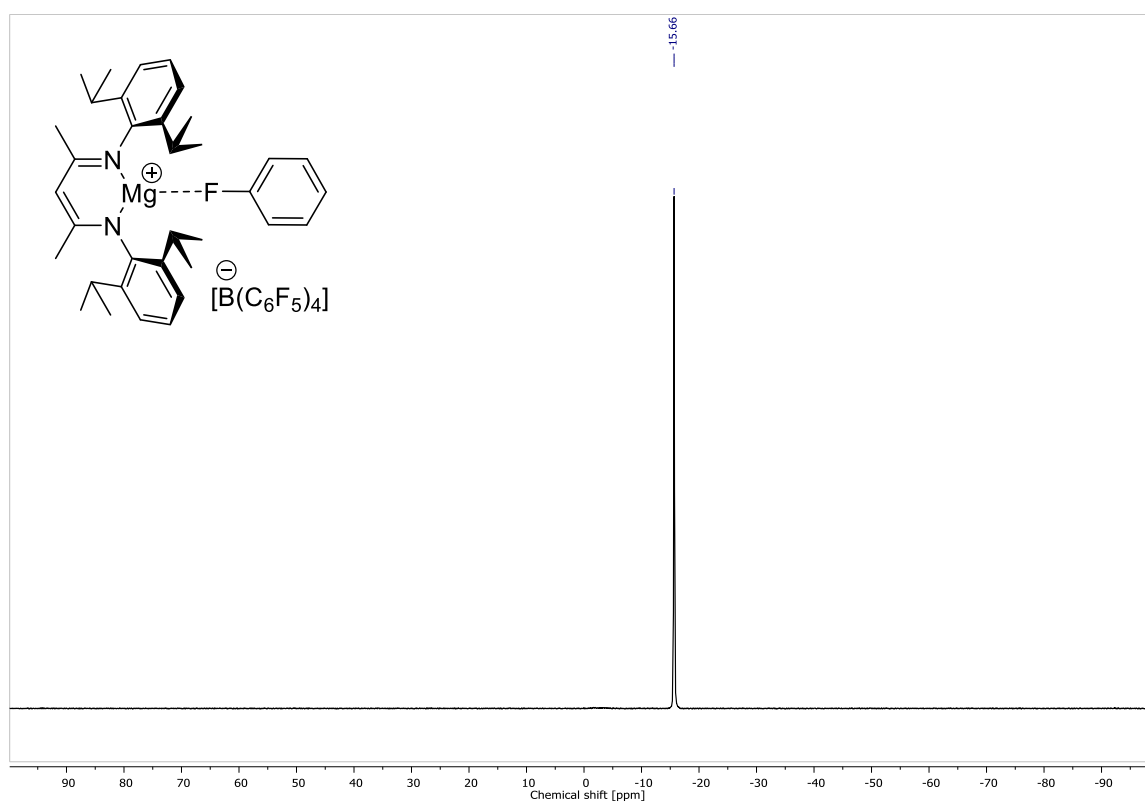

**Figure S3:**  $^{11}\text{B}$  NMR spectrum of  $[(\text{MeBDI})\text{Mg}^+\cdot\text{PhF}][\text{B}(\text{C}_6\text{F}_5)_4^-]$  in  $\text{C}_6\text{D}_5\text{Br}$ .

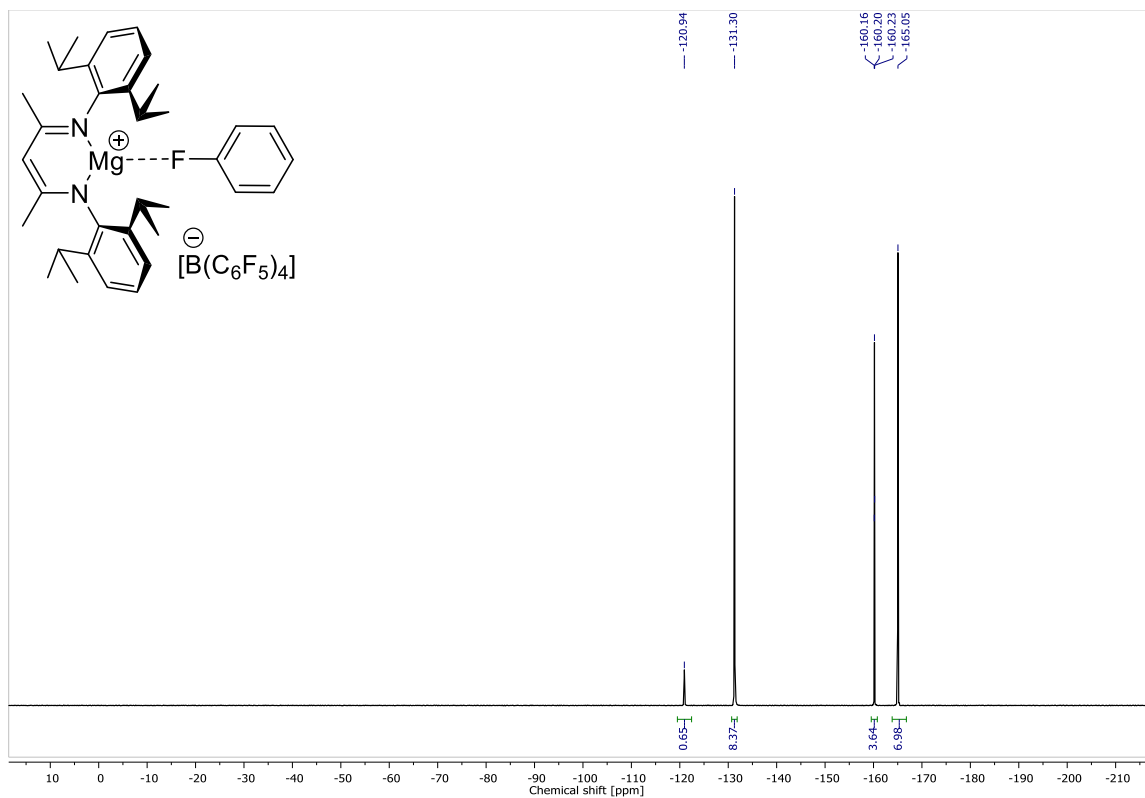

Figure S4:  $^{19}\text{F}$  NMR spectrum of  $[(^{\text{Me}}\text{BDI})\text{Mg}^+\cdot\text{PhF}][\text{B}(\text{C}_6\text{F}_5)_4^-]$  in  $\text{C}_6\text{D}_5\text{Br}$ .

### 1.1.2. Spectra of $[(^{\text{tBu}}\text{BDI})\text{Mg}^+\cdot(\text{PhF})_2][\text{B}(\text{C}_6\text{F}_5)_4^-]$

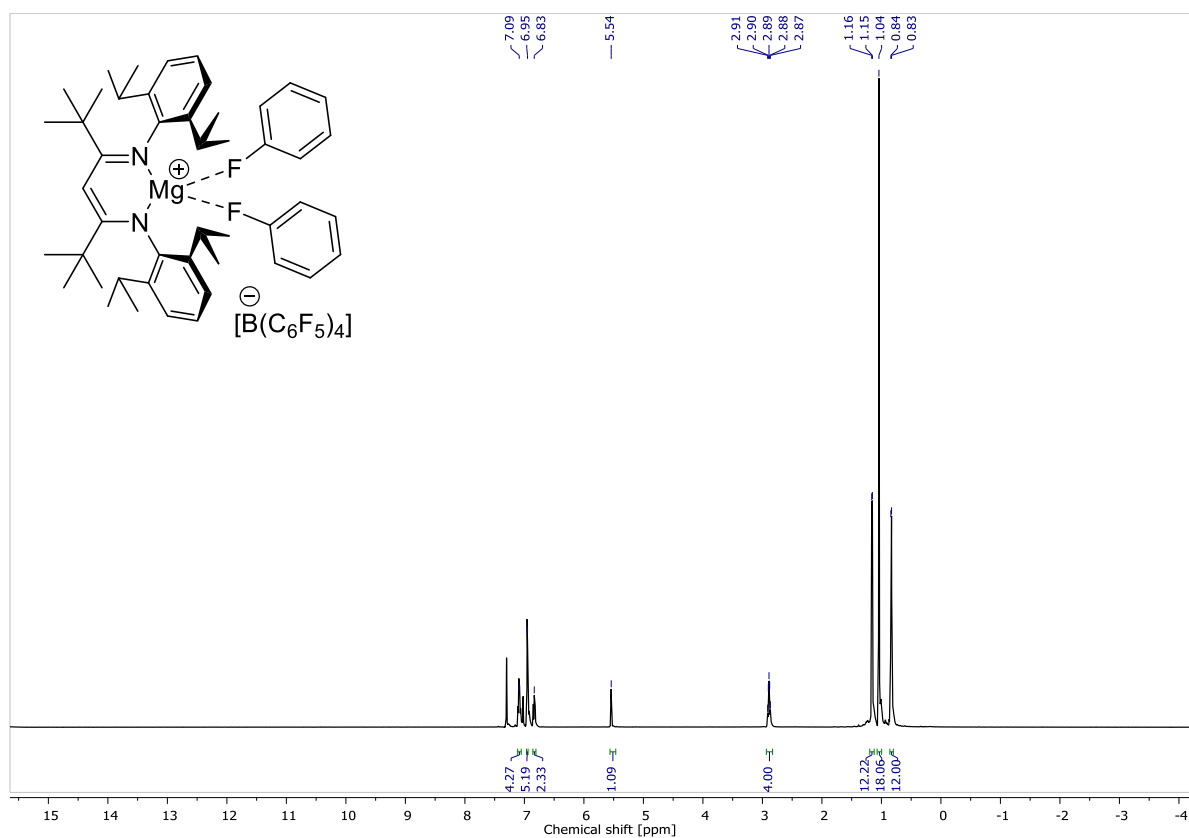

Figure S5:  $^1\text{H}$  NMR spectrum of  $[(^{\text{tBu}}\text{BDI})\text{Mg}^+\cdot(\text{PhF})_2][\text{B}(\text{C}_6\text{F}_5)_4^-]$  in  $\text{C}_6\text{D}_5\text{Br}$ .

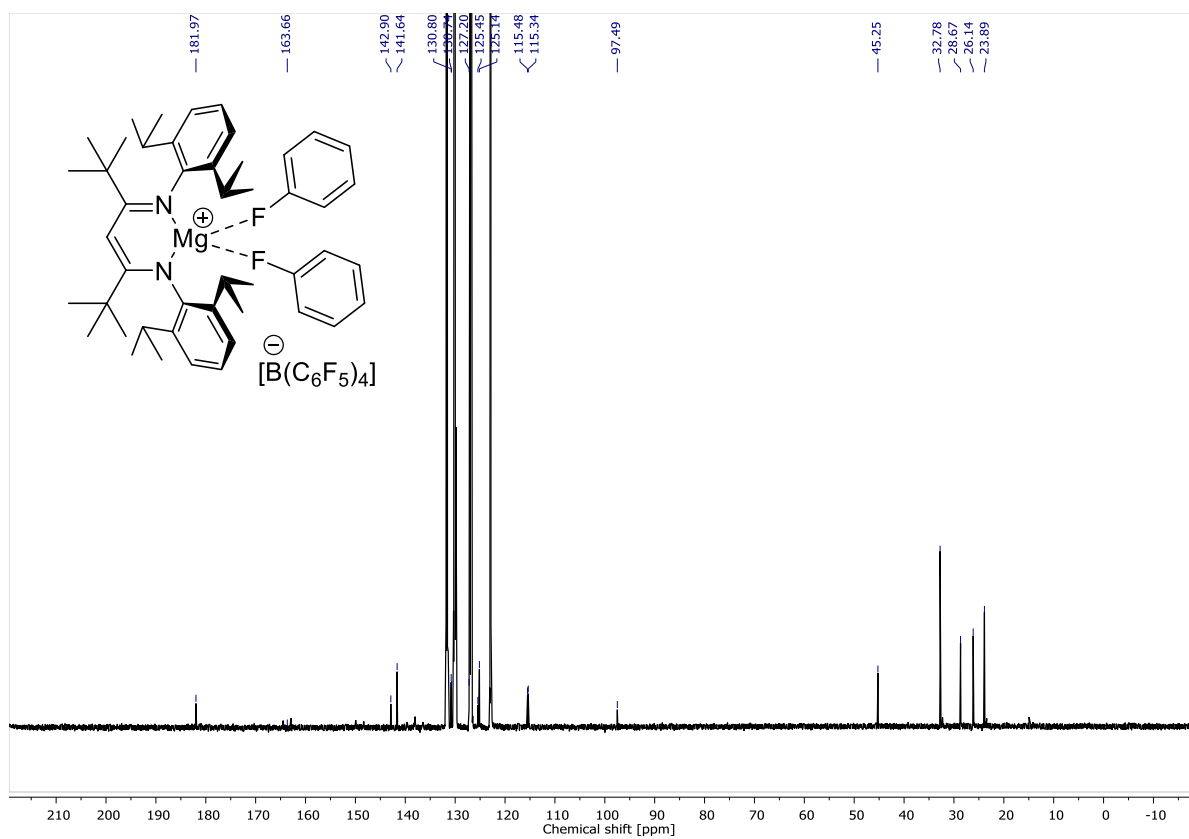

**Figure S6:**  $^{13}\text{C}\{^1\text{H}\}$  NMR spectrum of  $[(t\text{BuBDI})\text{Mg}^+(\text{PhF})_2][\text{B}(\text{C}_6\text{F}_5)_4^-]$  in  $\text{C}_6\text{D}_5\text{Br}$ .

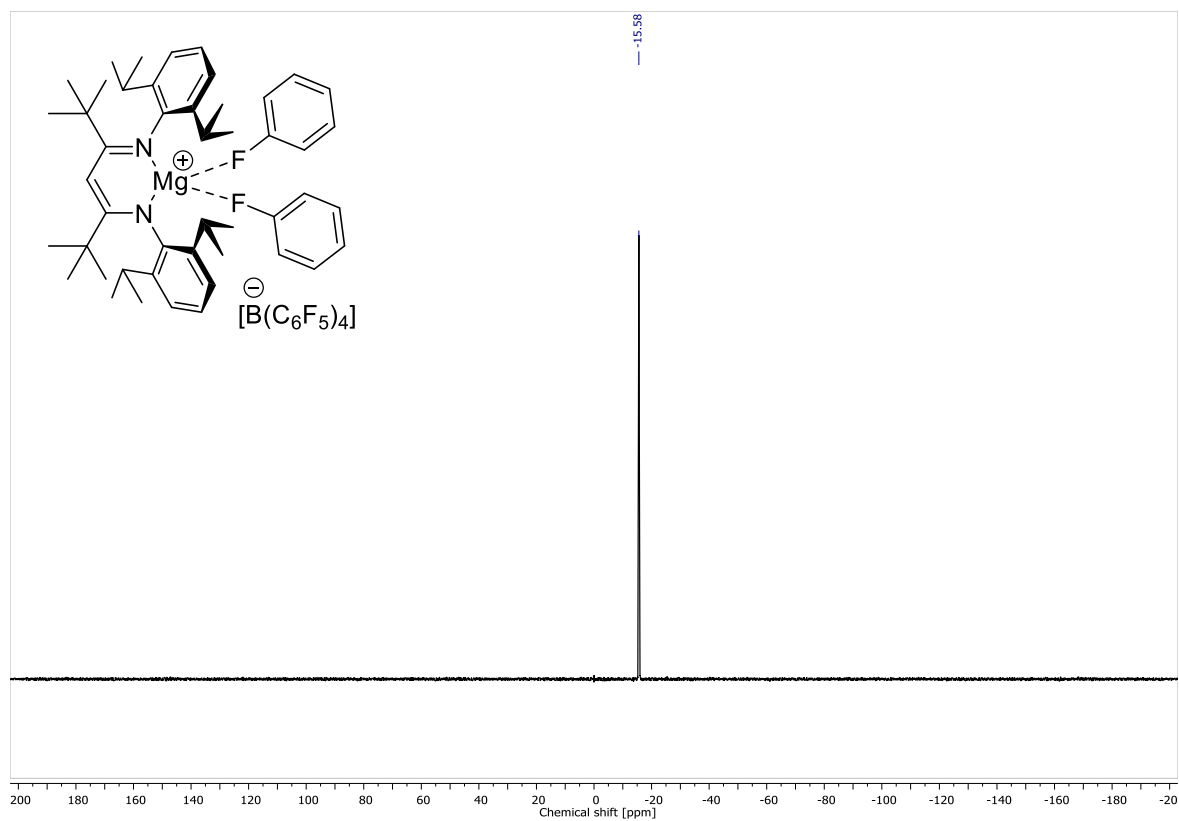

**Figure S7:**  $^{11}\text{B}$  NMR spectrum of  $[(t\text{BuBDI})\text{Mg}^+(\text{PhF})_2][\text{B}(\text{C}_6\text{F}_5)_4^-]$  in  $\text{C}_6\text{D}_5\text{Br}$ .

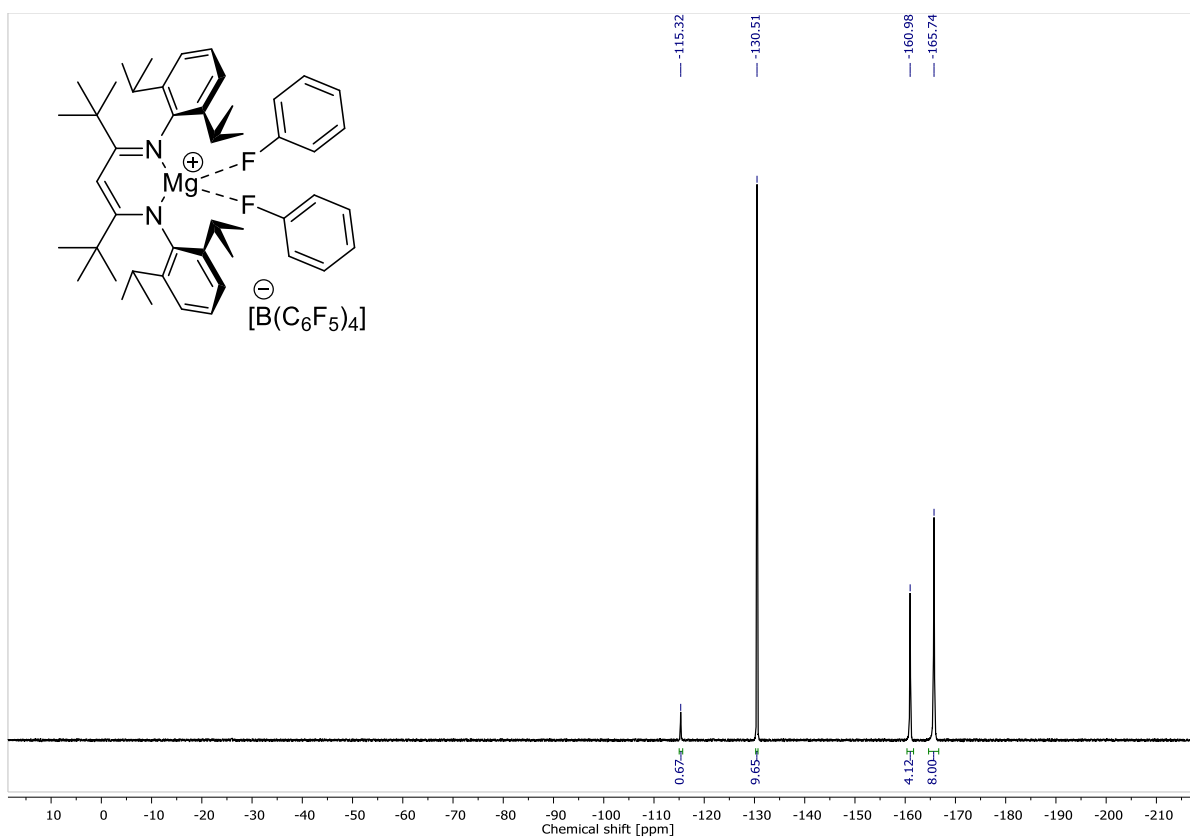

**Figure S8:**  $^{19}\text{F}$  NMR spectrum of  $[(t\text{BuBDI})\text{Mg}^+(\text{PhF})_2][\text{B}(\text{C}_6\text{F}_5)_4^-]$  in  $\text{C}_6\text{D}_5\text{Br}$ .

### 1.1.3. Spectra of $[(t\text{BuBDI})\text{Mg}^+(\text{PhF})_2][\text{Al-F-Al}]^-$

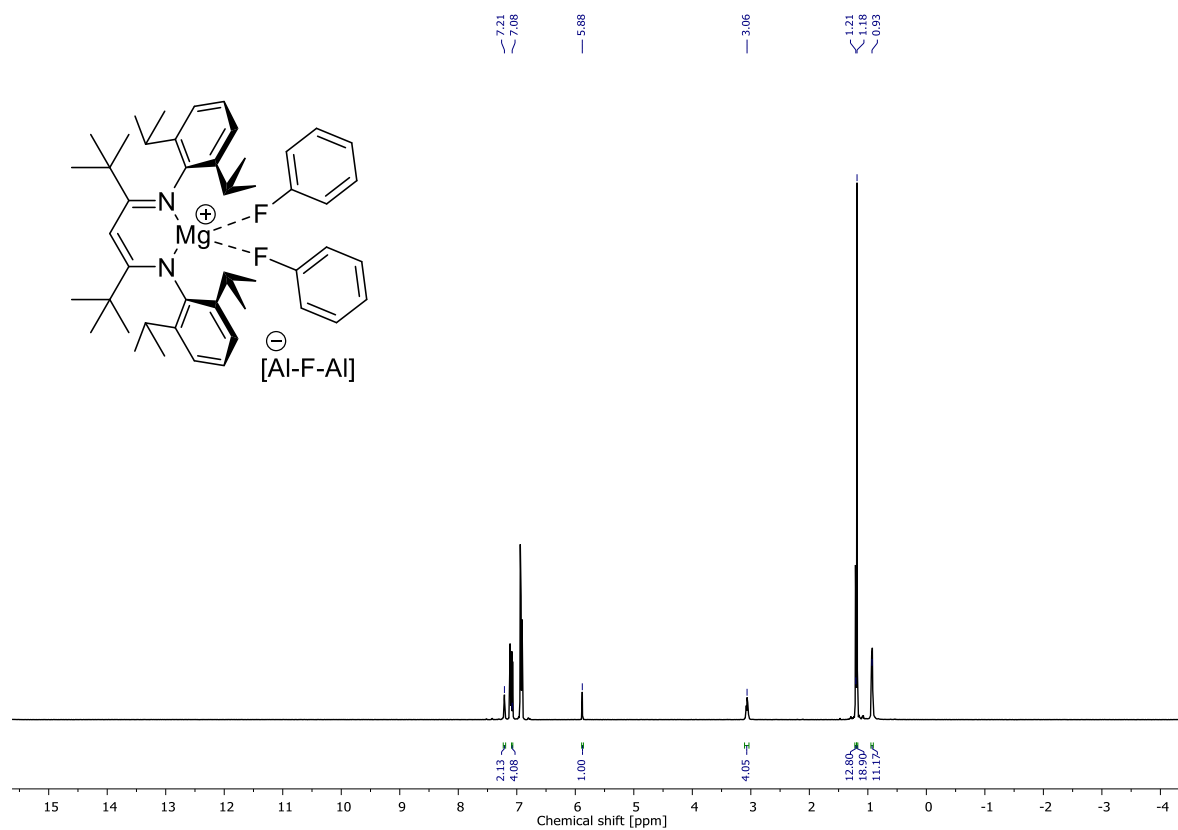

**Figure S9:**  $^1\text{H}$  NMR spectrum of  $[(t\text{BuBDI})\text{Mg}^+(\text{PhF})_2][\text{Al-F-Al}]^-$  in  $\text{C}_6\text{D}_5\text{F}$ .

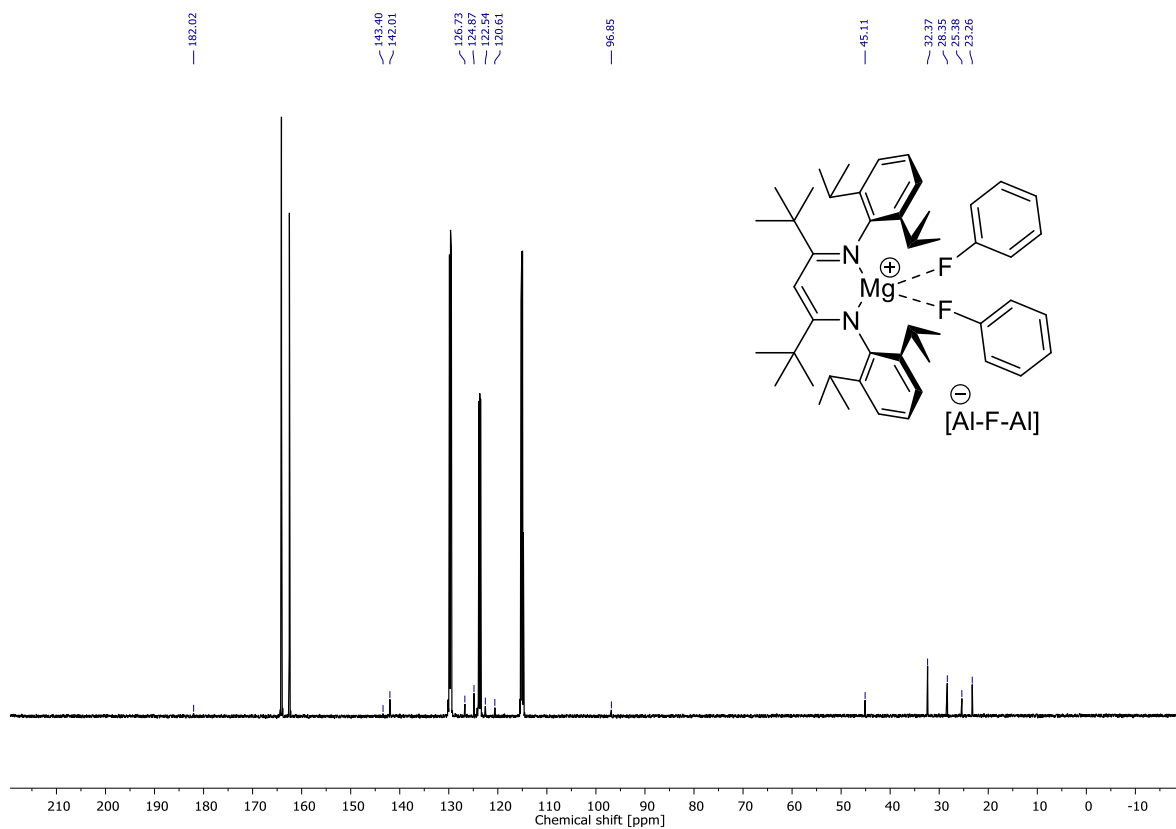

Figure S10:  $^{13}\text{C}$  NMR spectrum of  $[(t^{\text{Bu}}\text{BDI})\text{Mg}^+(\text{PhF})_2][\text{Al-F-Al}^-]$  in  $\text{C}_6\text{D}_5\text{F}$ .

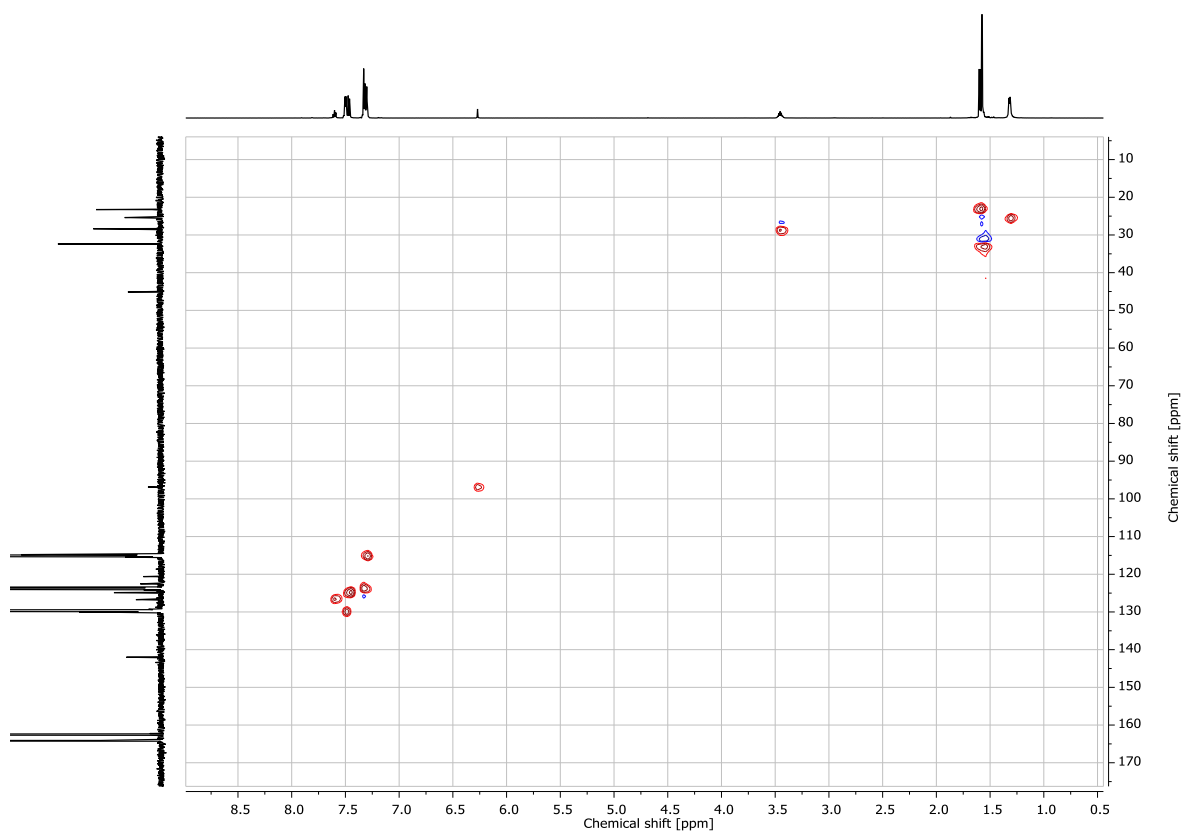

Figure S11: 2D HSQC NMR spectrum of  $[(t^{\text{Bu}}\text{BDI})\text{Mg}^+(\text{PhF})_2][\text{Al-F-Al}^-]$  in  $\text{C}_6\text{D}_5\text{F}$ .

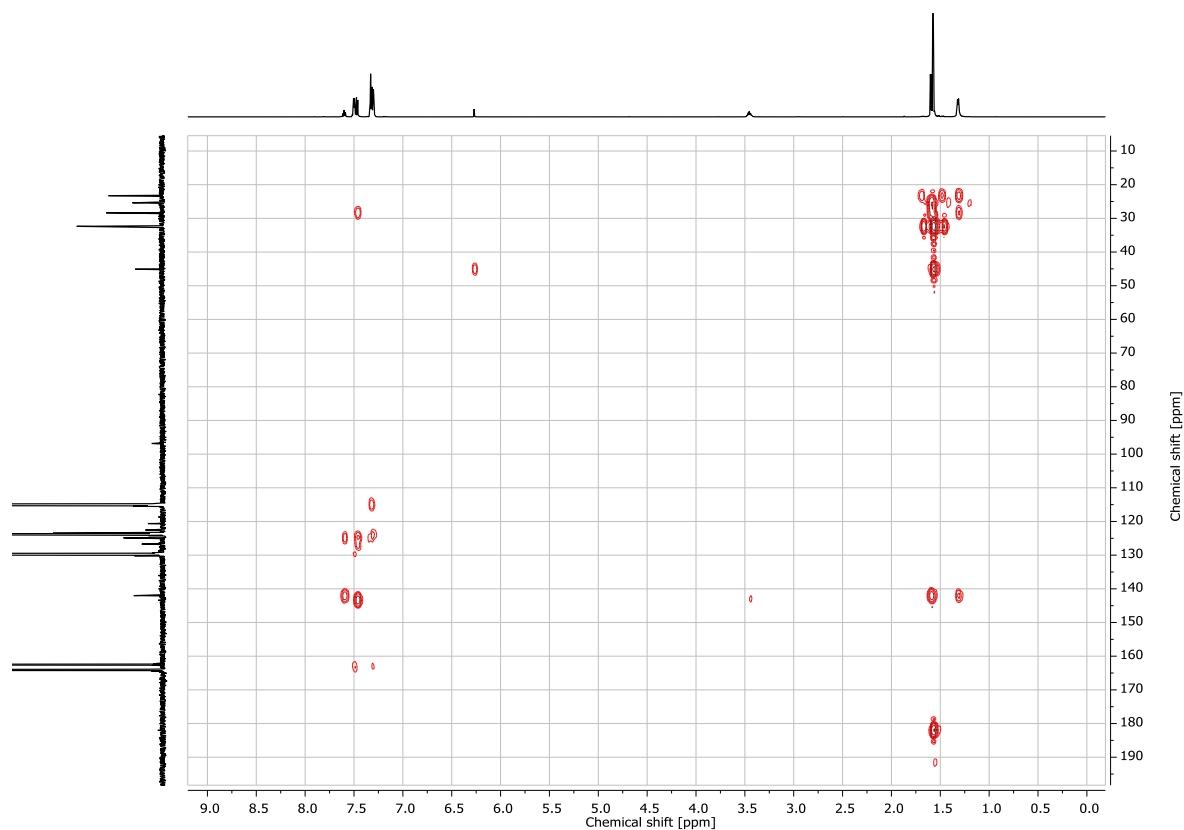

Figure S12: 2D HMBC NMR spectrum of  $[(t\text{BuBDI})\text{Mg}^+(\text{PhF})_2][\text{Al-F-Al}^-]$  in  $\text{C}_6\text{D}_5\text{F}$ .

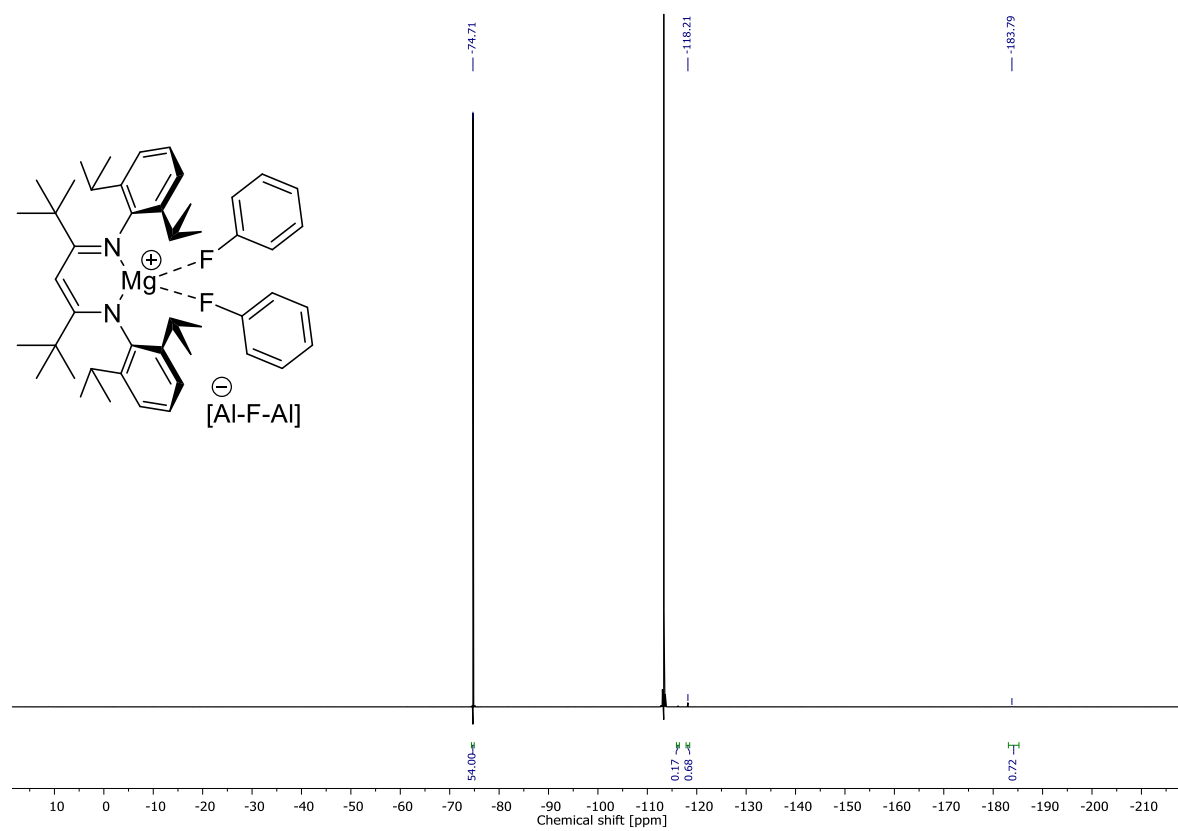

Figure S13:  $^{19}\text{F}$  NMR spectrum of  $[(t\text{BuBDI})\text{Mg}^+(\text{PhF})_2][\text{Al-F-Al}^-]$  in  $\text{C}_6\text{D}_5\text{F}$ .



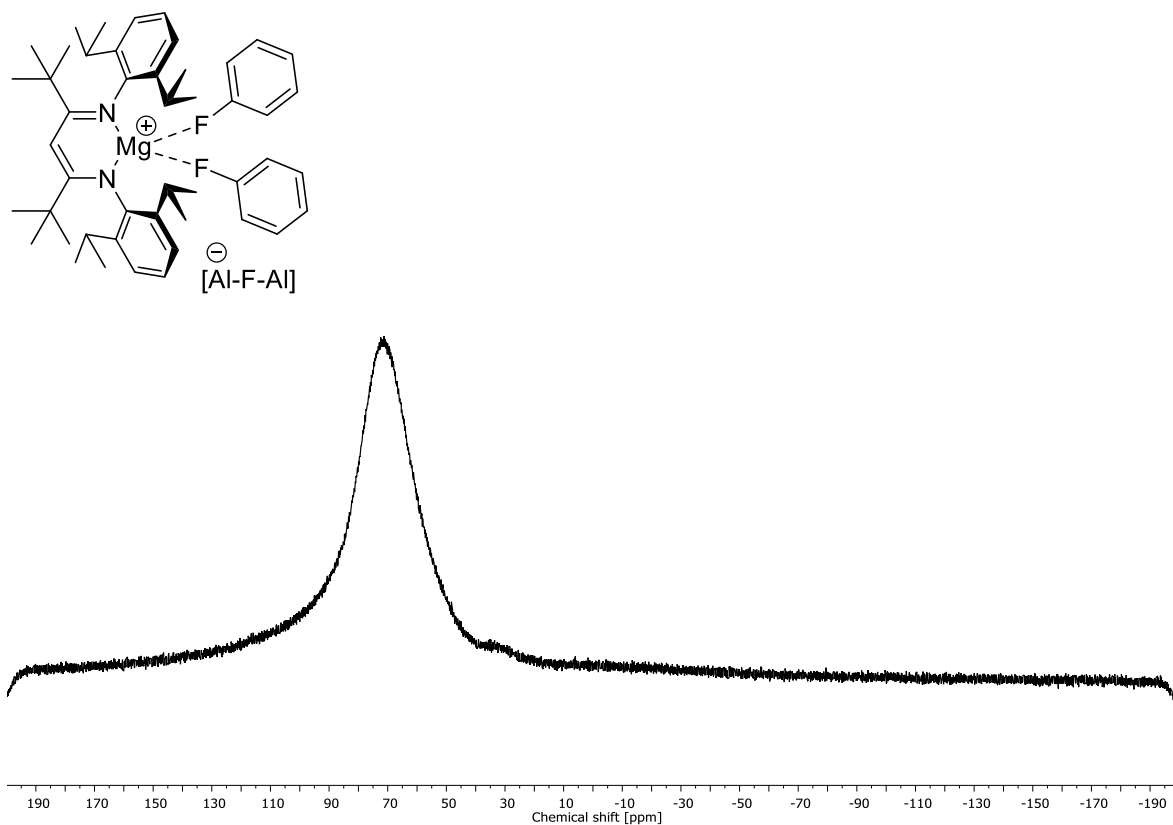

Figure S14:  $^{27}\text{Al}$  NMR spectrum of  $[(t\text{BuBDI})\text{Mg}^+(\text{PhF})_2][\text{Al-F-Al}]^-$  in  $\text{C}_6\text{D}_5\text{F}$ .

#### 1.1.4. Spectra of $[(t\text{BuBDI})\text{Mg}^+\text{-PhBr}][\text{B}(\text{C}_6\text{F}_5)_4]^-$

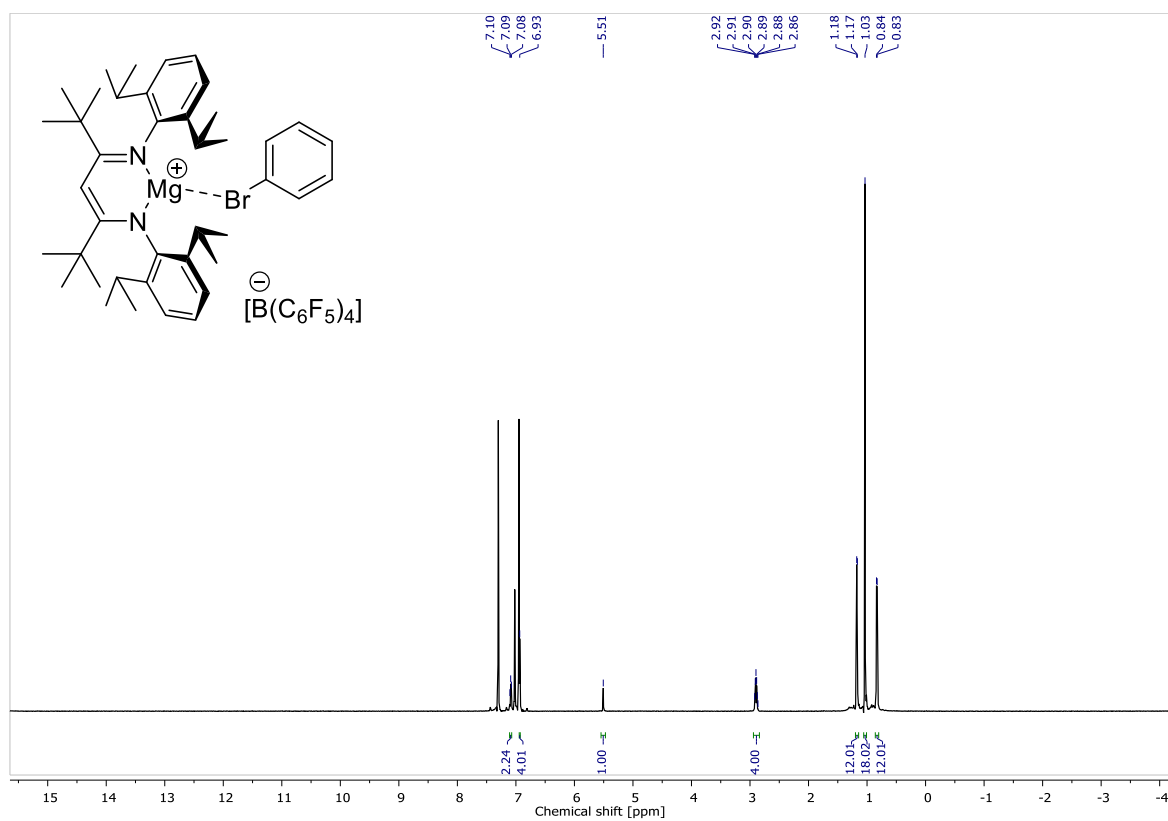

Figure S15:  $^1\text{H}$  NMR spectrum of  $[(t\text{BuBDI})\text{Mg}^+\text{-PhBr}][\text{B}(\text{C}_6\text{F}_5)_4]^-$  in  $\text{C}_6\text{D}_5\text{Br}$ .

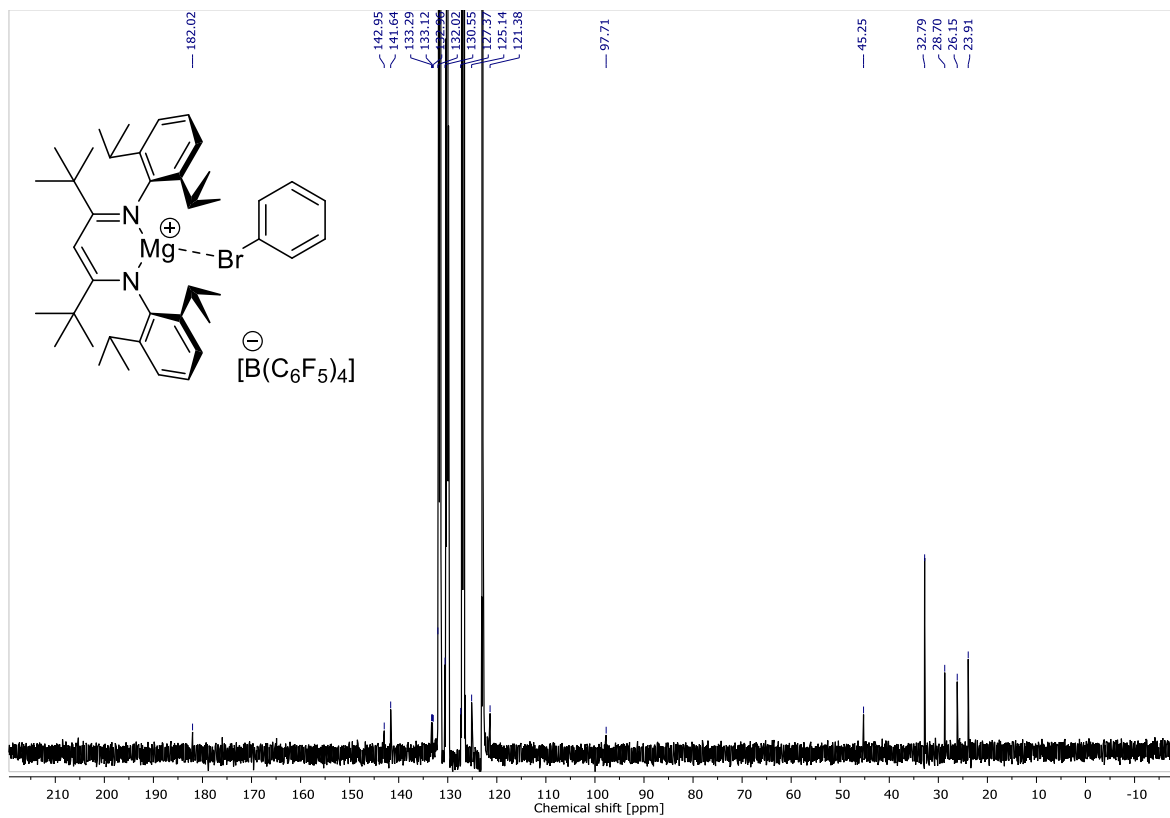

Figure S16:  $^{13}\text{C}\{^1\text{H}\}$  NMR spectrum of  $[(t\text{BuBDI})\text{Mg}^+\cdot\text{PhBr}][\text{B}(\text{C}_6\text{F}_5)_4^-]$  in  $\text{C}_6\text{D}_5\text{Br}$ .

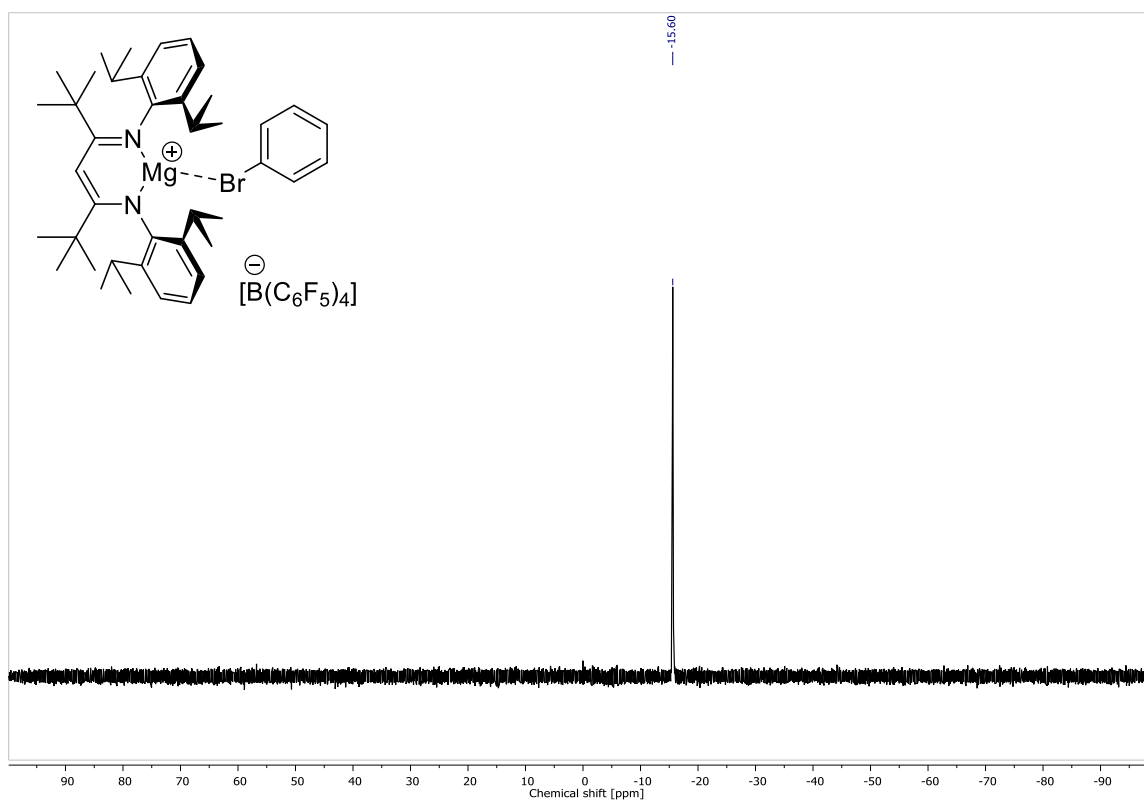

Figure S17:  $^{11}\text{B}$  NMR spectrum of  $[(t\text{BuBDI})\text{Mg}^+\cdot\text{PhBr}][\text{B}(\text{C}_6\text{F}_5)_4^-]$  in  $\text{C}_6\text{D}_5\text{Br}$ .

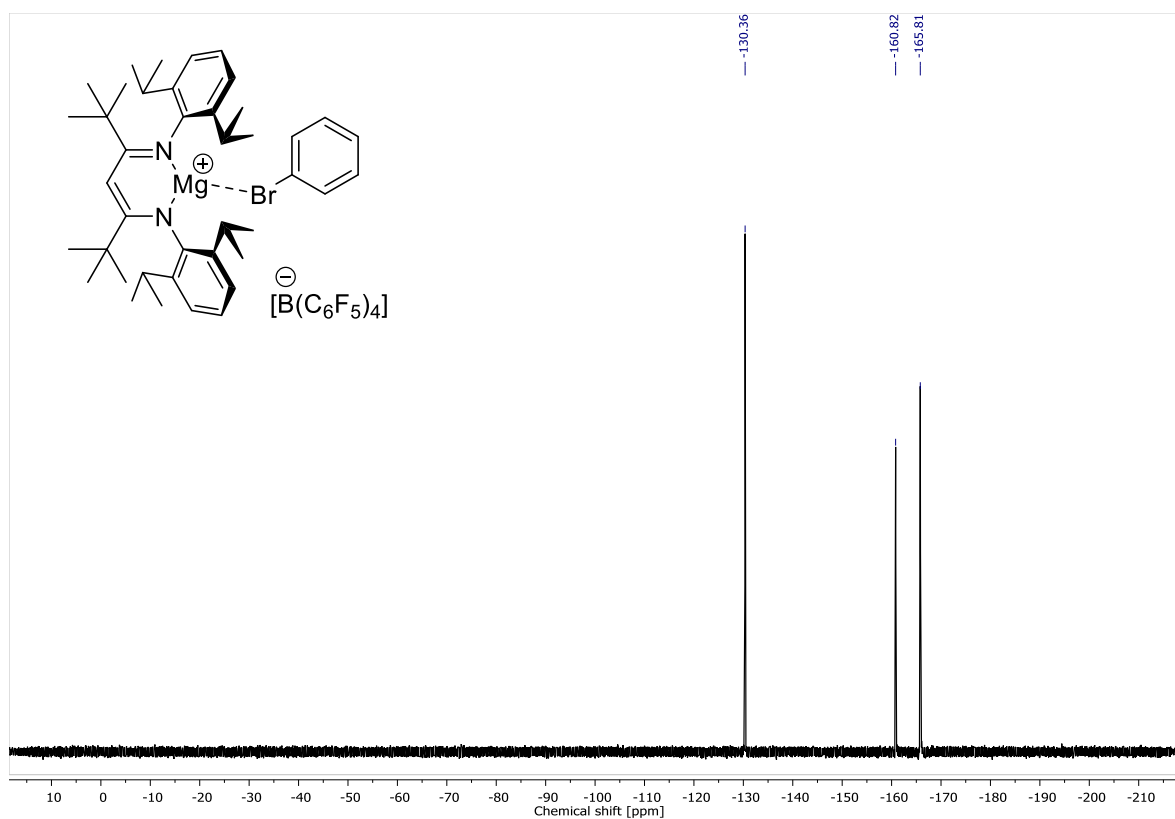

Figure S18:  $^{19}\text{F}$  NMR spectrum of  $[(t\text{BuBDI})\text{Mg}^+\cdot\text{PhBr}][\text{B}(\text{C}_6\text{F}_5)_4^-]$  in  $\text{C}_6\text{D}_5\text{Br}$ .

#### 1.1.4 Spectra of $[(t\text{BuBDI})\text{Mg}^+\cdot\text{PhI}][\text{B}(\text{C}_6\text{F}_5)_4^-]$

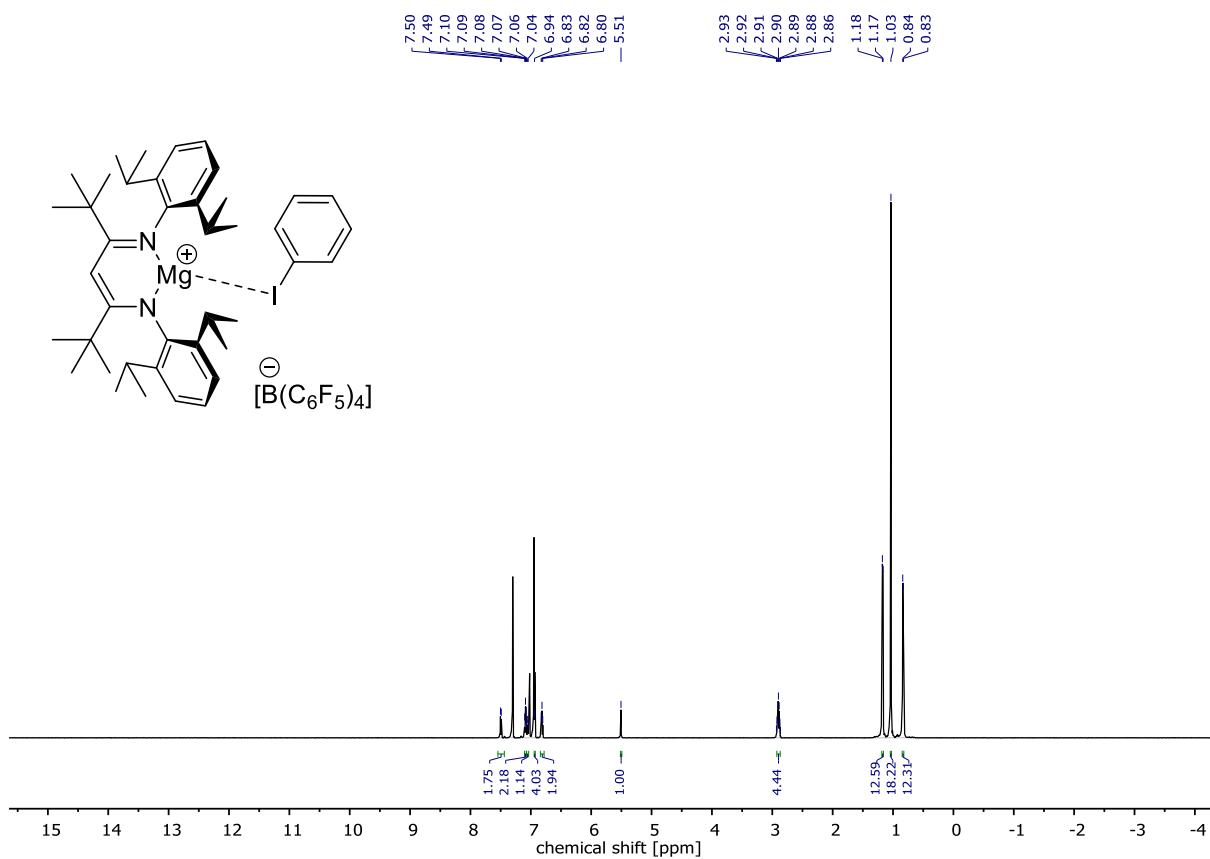

Figure S19:  $^1\text{H}$  NMR spectrum of  $[(t\text{BuBDI})\text{Mg}^+\cdot\text{PhI}][\text{B}(\text{C}_6\text{F}_5)_4^-]$  in  $\text{C}_6\text{D}_5\text{Br}$ .

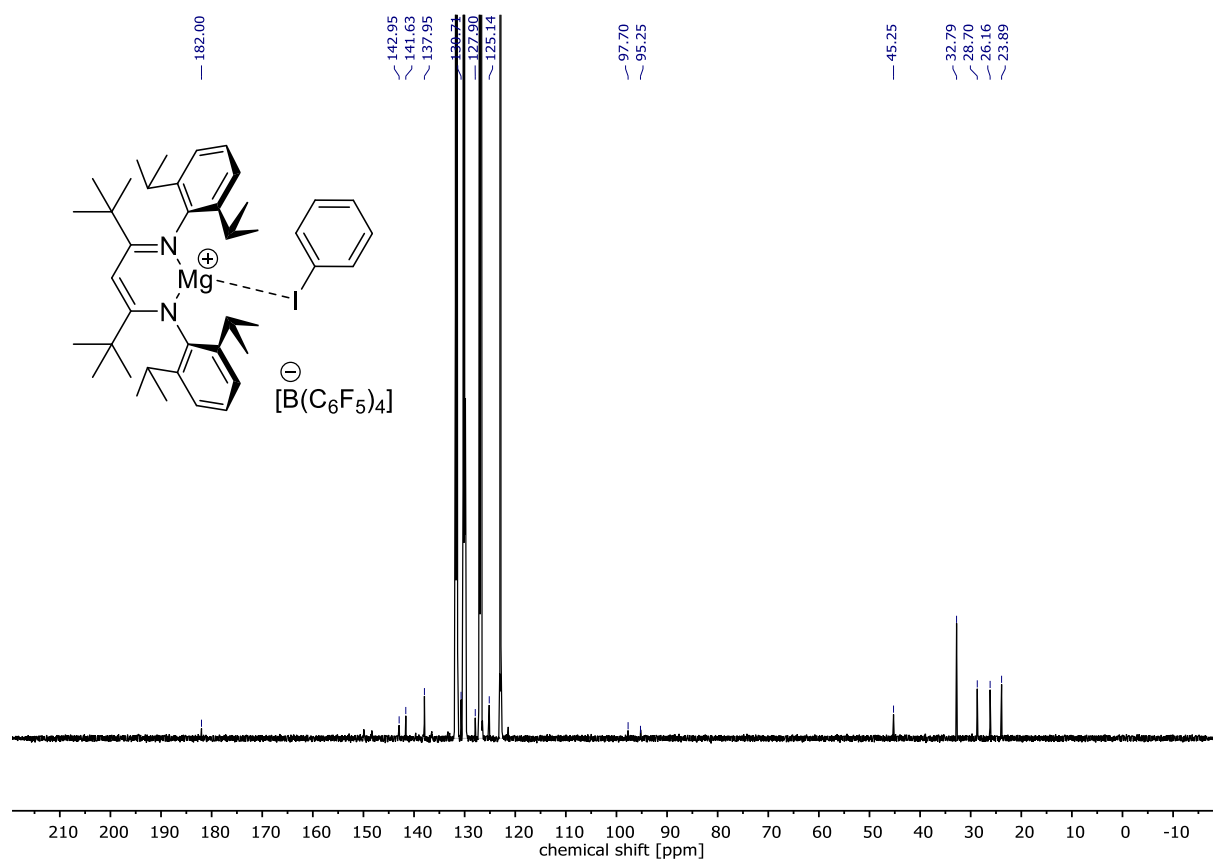

**Figure S20:**  $^{13}\text{C}\{^1\text{H}\}$  NMR spectrum of  $[(t^{\text{Bu}}\text{BDI})\text{Mg}^+\cdot\text{PhI}][\text{B}(\text{C}_6\text{F}_5)_4^-]$  in  $\text{C}_6\text{D}_5\text{Br}$ .

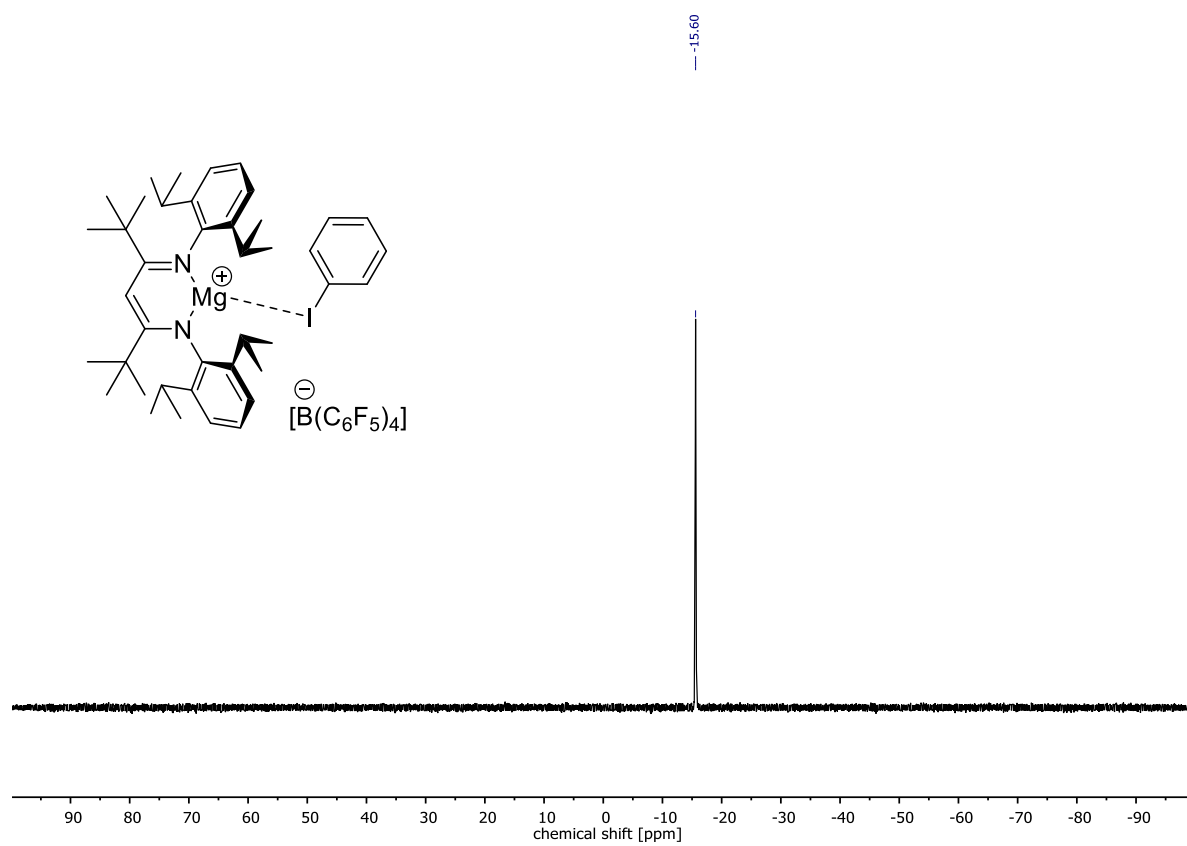

**Figure S21:**  $^{11}\text{B}$  NMR spectrum of  $[(t^{\text{Bu}}\text{BDI})\text{Mg}^+\cdot\text{PhI}][\text{B}(\text{C}_6\text{F}_5)_4^-]$  in  $\text{C}_6\text{D}_5\text{Br}$ .

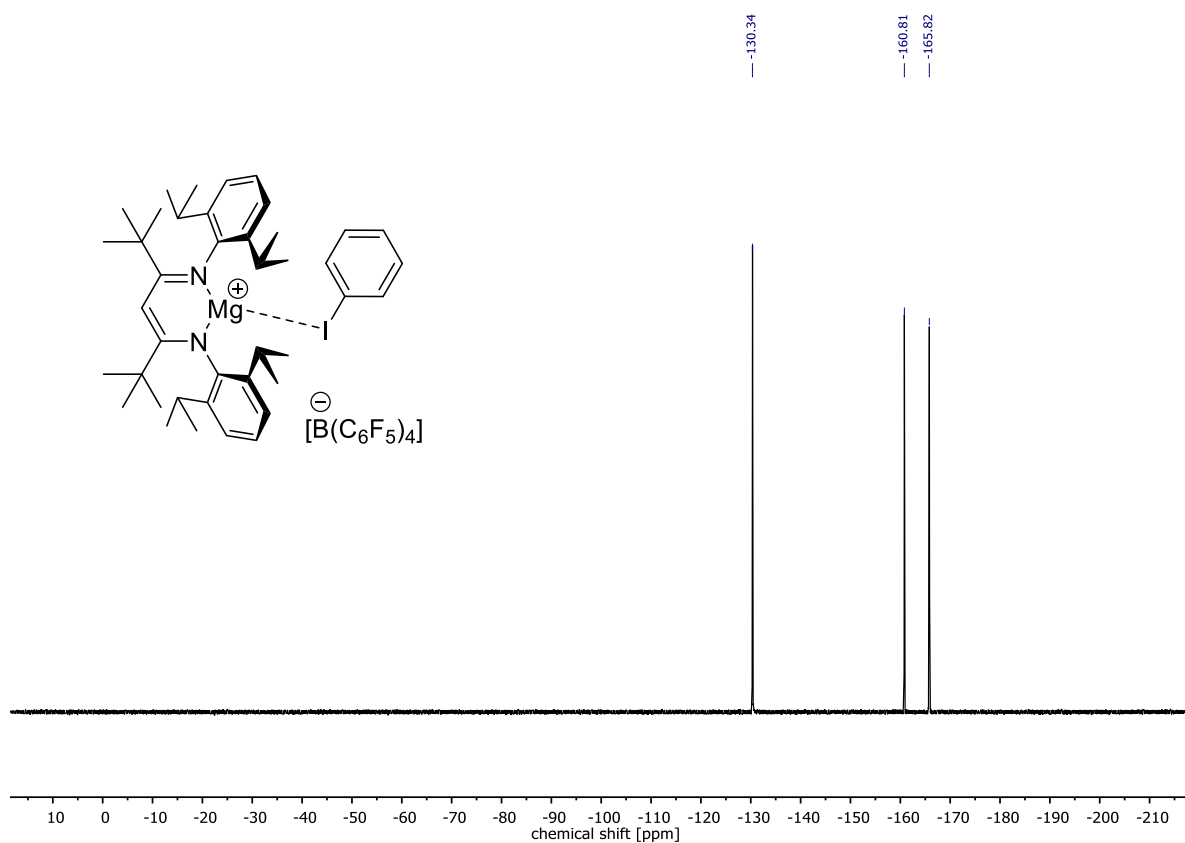

**Figure S22:**  $^{19}\text{F}$  NMR spectrum of  $[(\text{tBuBDI})\text{Mg}^+\cdot\text{PhI}][\text{B}(\text{C}_6\text{F}_5)_4^-]$  in  $\text{C}_6\text{D}_5\text{Br}$ .

## 1.2 Single Crystal X-Ray Diffraction

A crystal of the corresponding compound was embedded in inert perfluoropolyalkylether (viscosity 1800 cSt; ABCR GmbH) and mounted using a Hampton Research CryoLoop. The crystal was then flash cooled to 100.0(2) K in a nitrogen gas stream and kept at this temperature during the experiment. The crystal structure was measured on a SuperNova diffractometer with Atlas S2 detector using a CuK $\alpha$  microfocus source. The measured data was processed with the CrysAlisPro (v40.67a) software package.<sup>[S1]</sup> Using Olex2,<sup>[S2]</sup> the structure was solved with the ShelXT<sup>[S3A]</sup> structure solution program using Intrinsic Phasing and refined with the ShelXL<sup>[S3B]</sup> refinement package using Least Squares Minimization. All non-hydrogen atoms were refined anisotropically. All hydrogen atoms were placed in ideal positions and refined as riding atoms with relative isotropic displacement parameters.

[(<sup>Me</sup>BDI)Mg<sup>+</sup>·(PhF)<sub>3</sub>][B(C<sub>6</sub>F<sub>5</sub>)<sub>4</sub><sup>-</sup>]: Disorder of a *i*Pr group was observed and modeled with the help of similarity restraints (SADI). The relative occupancies of the two alternative orientations were refined to 0.57(3) and 0.43(3). [(<sup>tBu</sup>BDI)Mg<sup>+</sup>·(PhF)<sub>2</sub>][B(C<sub>6</sub>F<sub>5</sub>)<sub>4</sub><sup>-</sup>]: Disorder of a *t*Bu group was observed and modeled with the help of similarity restraints (SADI). The relative occupancies of the two alternative orientations were refined to 0.525(11) and 0.475(11). [(<sup>tBu</sup>BDI)Mg<sup>+</sup>·(PhF)<sub>2</sub>][Al-F-Al<sup>-</sup>]: Disorder of three perfluorinated *t*BuO groups and of one fluorobenzene ligand was observed. The disorder was modeled with the help of similarity restraints (SIMU, SADI). The relative occupancies of the two alternative orientations were refined to 0.916(3)/0.084(3) (F<sub>9</sub>-*t*BuO 1), 0.721(8)/0.279(8) (F<sub>9</sub>-*t*BuO 2), 0.607(16)/0.393(16) (F<sub>9</sub>-*t*BuO 3), and 0.69(2)/0.31(2) (PhF), respectively.

**Table S1.** Crystal data.

| Compound                                                                  | $[(^{\text{Me}}\text{BDI})\text{Mg}^+\cdot\text{PhF}][\text{B}(\text{C}_6\text{F}_5)_4^-]$ | $[(^{\text{Me}}\text{BDI})\text{Mg}^+\cdot(\text{PhF})_3][\text{B}(\text{C}_6\text{F}_5)_4^-]$ | $[(^{\text{tBu}}\text{BDI})\text{Mg}^+\cdot(\text{PhF})_2][\text{B}(\text{C}_6\text{F}_5)_4^-]$ |
|---------------------------------------------------------------------------|--------------------------------------------------------------------------------------------|------------------------------------------------------------------------------------------------|-------------------------------------------------------------------------------------------------|
| <b>Empirical formula</b>                                                  | $\text{C}_{59}\text{H}_{46}\text{BF}_{21}\text{MgN}_2$                                     | $\text{C}_{71}\text{H}_{56}\text{BF}_{23}\text{MgN}_2$                                         | $\text{C}_{71}\text{H}_{63}\text{BF}_{22}\text{MgN}_2$                                          |
| <b>Formula weight</b>                                                     | 1217.10                                                                                    | 1409.29                                                                                        | 1397.35                                                                                         |
| <b>Temperature/K</b>                                                      | 99.94(17)                                                                                  | 100                                                                                            | 100.0(1)                                                                                        |
| <b>Crystal system</b>                                                     | triclinic                                                                                  | triclinic                                                                                      | monoclinic                                                                                      |
| <b>Space group</b>                                                        | P-1                                                                                        | P-1                                                                                            | $\text{P2}_1/\text{c}$                                                                          |
| <b>a/Å</b>                                                                | 11.5834(5)                                                                                 | 12.2177(3)                                                                                     | 18.37340(10)                                                                                    |
| <b>b/Å</b>                                                                | 12.7194(6)                                                                                 | 15.9583(5)                                                                                     | 18.09830(10)                                                                                    |
| <b>c/Å</b>                                                                | 19.1287(8)                                                                                 | 17.8965(5)                                                                                     | 19.72950(10)                                                                                    |
| <b><math>\alpha/^\circ</math></b>                                         | 86.142(3)                                                                                  | 102.494(3)                                                                                     | 90                                                                                              |
| <b><math>\beta/^\circ</math></b>                                          | 77.884(4)                                                                                  | 106.268(3)                                                                                     | 98.0610(10)                                                                                     |
| <b><math>\gamma/^\circ</math></b>                                         | 80.927(4)                                                                                  | 96.734(2)                                                                                      | 90                                                                                              |
| <b>Volume/Å<sup>3</sup></b>                                               | 2719.3(2)                                                                                  | 3210.88(17)                                                                                    | 6495.77(6)                                                                                      |
| <b>Z</b>                                                                  | 2                                                                                          | 2                                                                                              | 4                                                                                               |
| <b><math>\rho_{\text{calc}}/\text{cm}^3</math></b>                        | 1.486                                                                                      | 1.458                                                                                          | 1.429                                                                                           |
| <b><math>\mu/\text{mm}^{-1}</math></b>                                    | 0.147                                                                                      | 1.238                                                                                          | 1.193                                                                                           |
| <b>F(000)</b>                                                             | 1240.0                                                                                     | 1440.0                                                                                         | 2872.0                                                                                          |
| <b>Crystal size/mm<sup>3</sup></b>                                        | 0.242 × 0.137 × 0.084                                                                      | 0.2647 × 0.1931 × 0.1823                                                                       | 0.273 × 0.193 × 0.155                                                                           |
| <b>Crystal color</b>                                                      | colorless                                                                                  | colorless                                                                                      | colorless                                                                                       |
| <b>Radiation</b>                                                          | MoK $\alpha$ ( $\lambda = 0.71073$ )                                                       | CuK $\alpha$ ( $\lambda = 1.54184$ )                                                           | CuK $\alpha$ ( $\lambda = 1.54184$ )                                                            |
| <b>2<math>\theta</math> range for data collection/<math>^\circ</math></b> | 6.216 to 52.744                                                                            | 5.778 to 136.232                                                                               | 6.658 to 147.34                                                                                 |
| <b>Index ranges</b>                                                       | $-14 \leq h \leq 14, -15 \leq k \leq 14, -23 \leq l \leq 23$                               | $-14 \leq h \leq 10, -18 \leq k \leq 19, -21 \leq l \leq 19$                                   | $-22 \leq h \leq 22, -22 \leq k \leq 22, -24 \leq l \leq 23$                                    |
| <b>Reflections collected</b>                                              | 26778                                                                                      | 19494                                                                                          | 62369                                                                                           |
| <b>Independent reflections</b>                                            | 11109 [ $R_{\text{int}} = 0.0368, R_{\text{sigma}} = 0.0476$ ]                             | 11623 [ $R_{\text{int}} = 0.0354, R_{\text{sigma}} = 0.0436$ ]                                 | 12980 [ $R_{\text{int}} = 0.0232, R_{\text{sigma}} = 0.0164$ ]                                  |
| <b>Data/restraints/parameters</b>                                         | 11109/0/767                                                                                | 11623/0/893                                                                                    | 12980/15/919                                                                                    |
| <b>Goodness-of-fit on <math>F^2</math></b>                                | 1.044                                                                                      | 1.046                                                                                          | 1.022                                                                                           |
| <b>Final R indexes [<math>I \geq 2\sigma(I)</math>]</b>                   | $R_1 = 0.0508, wR_2 = 0.1171$                                                              | $R_1 = 0.0417, wR_2 = 0.1066$                                                                  | $R_1 = 0.0311, wR_2 = 0.0787$                                                                   |
| <b>Final R indexes [all data]</b>                                         | $R_1 = 0.0717, wR_2 = 0.1292$                                                              | $R_1 = 0.0474, wR_2 = 0.1117$                                                                  | $R_1 = 0.0356, wR_2 = 0.0807$                                                                   |
| <b>Largest diff. peak/hole / e Å<sup>-3</sup></b>                         | 0.41/-0.36                                                                                 | 0.35/-0.32                                                                                     | 0.26/-0.22                                                                                      |

**Table S1.** Crystal data (continued).

| Compound                                    | $[(^t\text{BuBDI})\text{Mg}^+\cdot(\text{PhF})_2]$<br>[Al-F-Al <sup>-</sup> ]                   | $[(^t\text{BuBDI})\text{Mg}^+\cdot\text{PhBr}]$<br>[B(C <sub>6</sub> F <sub>5</sub> ) <sub>4</sub> <sup>-</sup> ] | $[(^t\text{BuBDI})\text{Mg}^+\cdot\text{PhI}]$<br>[B(C <sub>6</sub> F <sub>5</sub> ) <sub>4</sub> <sup>-</sup> ] |
|---------------------------------------------|-------------------------------------------------------------------------------------------------|-------------------------------------------------------------------------------------------------------------------|------------------------------------------------------------------------------------------------------------------|
| Empirical formula                           | C <sub>71</sub> H <sub>63</sub> Al <sub>2</sub> F <sub>57</sub> MgN <sub>2</sub> O <sub>6</sub> | C <sub>65</sub> H <sub>58</sub> BBRf <sub>20</sub> MgN <sub>2</sub>                                               | C <sub>65</sub> H <sub>58</sub> BF <sub>20</sub> IMgN <sub>2</sub>                                               |
| Formula weight                              | 2201.50                                                                                         | 1362.16                                                                                                           | 1409.15                                                                                                          |
| Temperature/K                               | 100.0(6)                                                                                        | 100.0(3)                                                                                                          | 100.02(16)                                                                                                       |
| Crystal system                              | triclinic                                                                                       | monoclinic                                                                                                        | monoclinic                                                                                                       |
| Space group                                 | P-1                                                                                             | P2 <sub>1</sub> /c                                                                                                | P2 <sub>1</sub> /c                                                                                               |
| a/Å                                         | 11.3521(3)                                                                                      | 18.6127(3)                                                                                                        | 18.7237(5)                                                                                                       |
| b/Å                                         | 15.9191(5)                                                                                      | 17.9643(2)                                                                                                        | 18.0226(4)                                                                                                       |
| c/Å                                         | 24.7380(7)                                                                                      | 18.7424(3)                                                                                                        | 18.7649(5)                                                                                                       |
| α/°                                         | 74.924(3)                                                                                       | 90                                                                                                                | 90                                                                                                               |
| β/°                                         | 85.545(2)                                                                                       | 102.9937(14)                                                                                                      | 102.692(3)                                                                                                       |
| γ/°                                         | 89.290(2)                                                                                       | 90                                                                                                                | 90                                                                                                               |
| Volume/Å <sup>3</sup>                       | 4303.5(2)                                                                                       | 6106.31(15)                                                                                                       | 6177.5(3)                                                                                                        |
| Z                                           | 2                                                                                               | 4                                                                                                                 | 4                                                                                                                |
| ρ <sub>calc</sub> /cm <sup>3</sup>          | 1.699                                                                                           | 1.482                                                                                                             | 1.515                                                                                                            |
| μ/mm <sup>-1</sup>                          | 2.000                                                                                           | 1.942                                                                                                             | 0.632                                                                                                            |
| F(000)                                      | 2204.0                                                                                          | 2776.0                                                                                                            | 2848.0                                                                                                           |
| Crystal size/mm <sup>3</sup>                | 0.295 × 0.249 × 0.1                                                                             | 0.339 × 0.26 × 0.16                                                                                               | 0.175 × 0.123 × 0.067                                                                                            |
| Crystal color                               | colorless                                                                                       | colorless                                                                                                         | colorless                                                                                                        |
| Radiation                                   | Cu Kα (λ = 1.54184)                                                                             | CuKα (λ = 1.54184)                                                                                                | Mo Kα (λ = 0.71073)                                                                                              |
| 2θ range for data collection/°              | 7.424 to 145.51                                                                                 | 6.902 to 146.388                                                                                                  | 4.52 to 59.456                                                                                                   |
| Index ranges                                | -13 ≤ h ≤ 10, -19 ≤ k ≤ 19, -30 ≤ l ≤ 29                                                        | -22 ≤ h ≤ 22, -20 ≤ k ≤ 21, -22 ≤ l ≤ 22                                                                          | -25 ≤ h ≤ 25, -21 ≤ k ≤ 24, -25 ≤ l ≤ 25                                                                         |
| Reflections collected                       | 29394                                                                                           | 21736                                                                                                             | 42831                                                                                                            |
| Independent reflections                     | 16538 [R <sub>int</sub> = 0.0270, R <sub>sigma</sub> = 0.0350]                                  | 11715 [R <sub>int</sub> = 0.0179, R <sub>sigma</sub> = 0.0233]                                                    | 15163 [R <sub>int</sub> = 0.0296, R <sub>sigma</sub> = 0.0393]                                                   |
| Data/restraints/parameters                  | 16538/6852/1633                                                                                 | 11715/0/825                                                                                                       | 15163/0/825                                                                                                      |
| Goodness-of-fit on F <sup>2</sup>           | 1.023                                                                                           | 1.027                                                                                                             | 1.021                                                                                                            |
| Final R indexes [I >= 2σ (I)]               | R <sub>1</sub> = 0.0400, wR <sub>2</sub> = 0.1001                                               | R <sub>1</sub> = 0.0304, wR <sub>2</sub> = 0.0750                                                                 | R <sub>1</sub> = 0.0388, wR <sub>2</sub> = 0.0844                                                                |
| Final R indexes [all data]                  | R <sub>1</sub> = 0.0452, wR <sub>2</sub> = 0.1046                                               | R <sub>1</sub> = 0.0326, wR <sub>2</sub> = 0.0767                                                                 | R <sub>1</sub> = 0.0569, wR <sub>2</sub> = 0.0927                                                                |
| Largest diff. peak/hole / e Å <sup>-3</sup> | 0.48/-0.37                                                                                      | 0.48/-0.62                                                                                                        | 0.57/-0.89                                                                                                       |



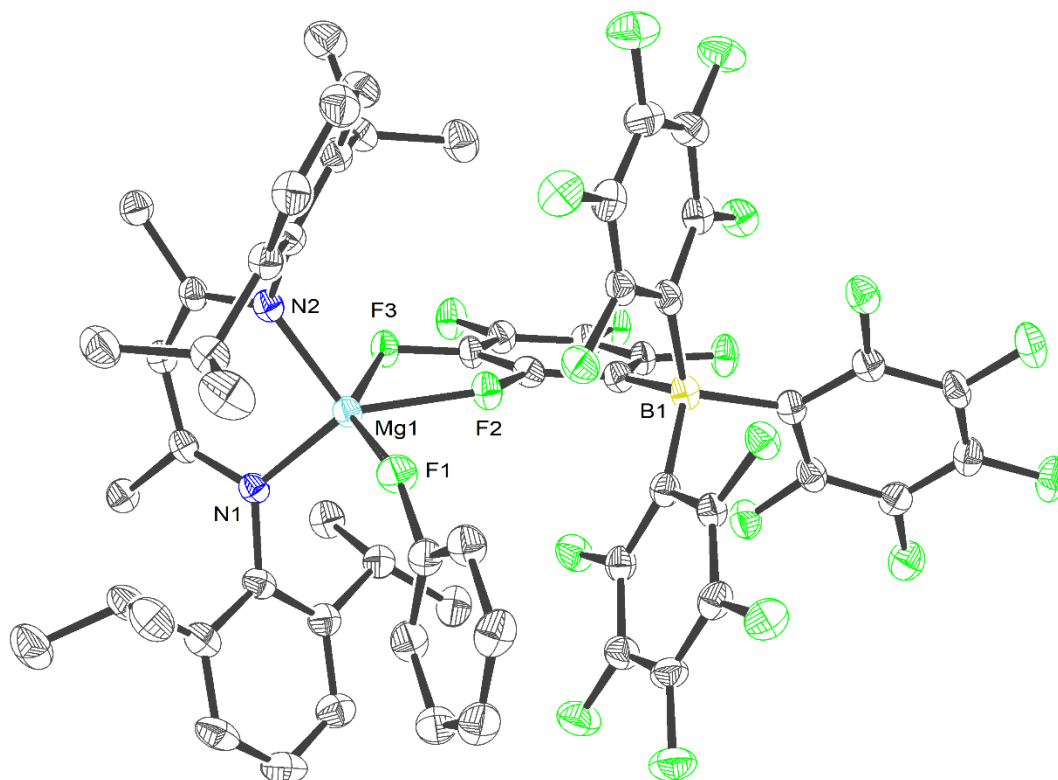

**Figure S23:** ORTEP representation of  $[(^{\text{Me}}\text{BDI})\text{Mg}^+(\text{PhF})][\text{B}(\text{C}_6\text{F}_5)_4^-]$  (probability level 50%). Hydrogen atoms were emitted for clarity.

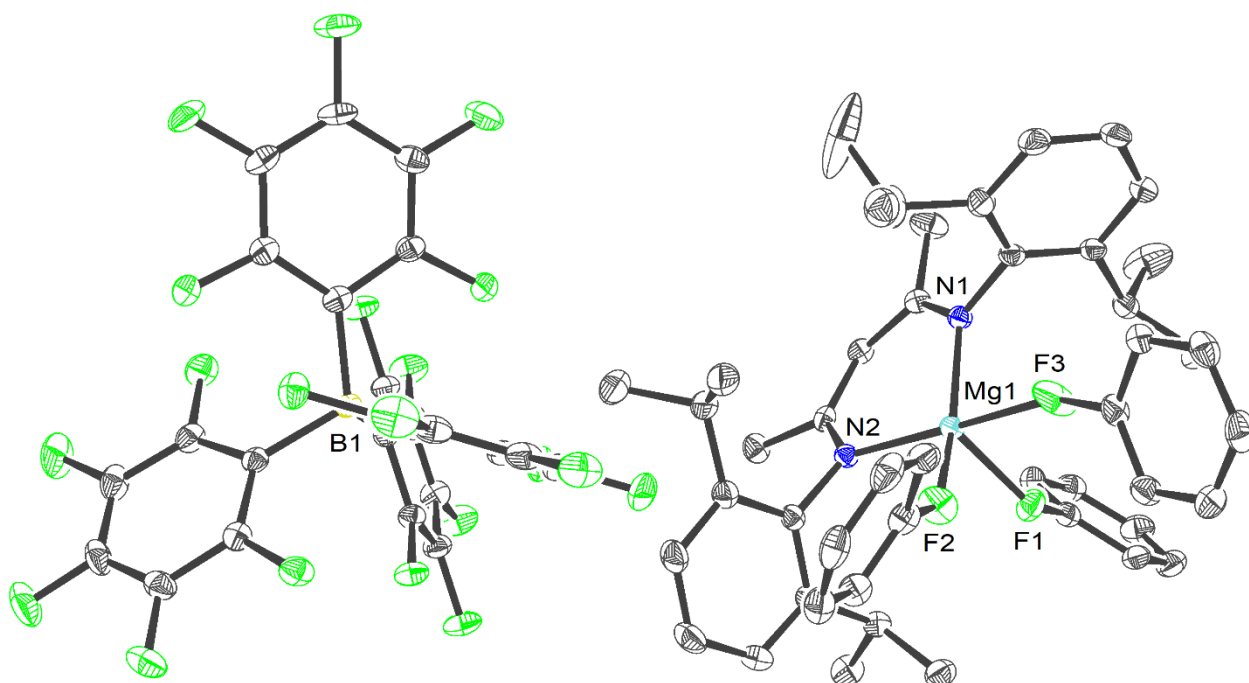

**Figure S24:** ORTEP representation of  $[(^{\text{Me}}\text{BDI})\text{Mg}^+(\text{PhF})_3][\text{B}(\text{C}_6\text{F}_5)_4^-]$  (probability level 50%). Hydrogen atoms were emitted for clarity.

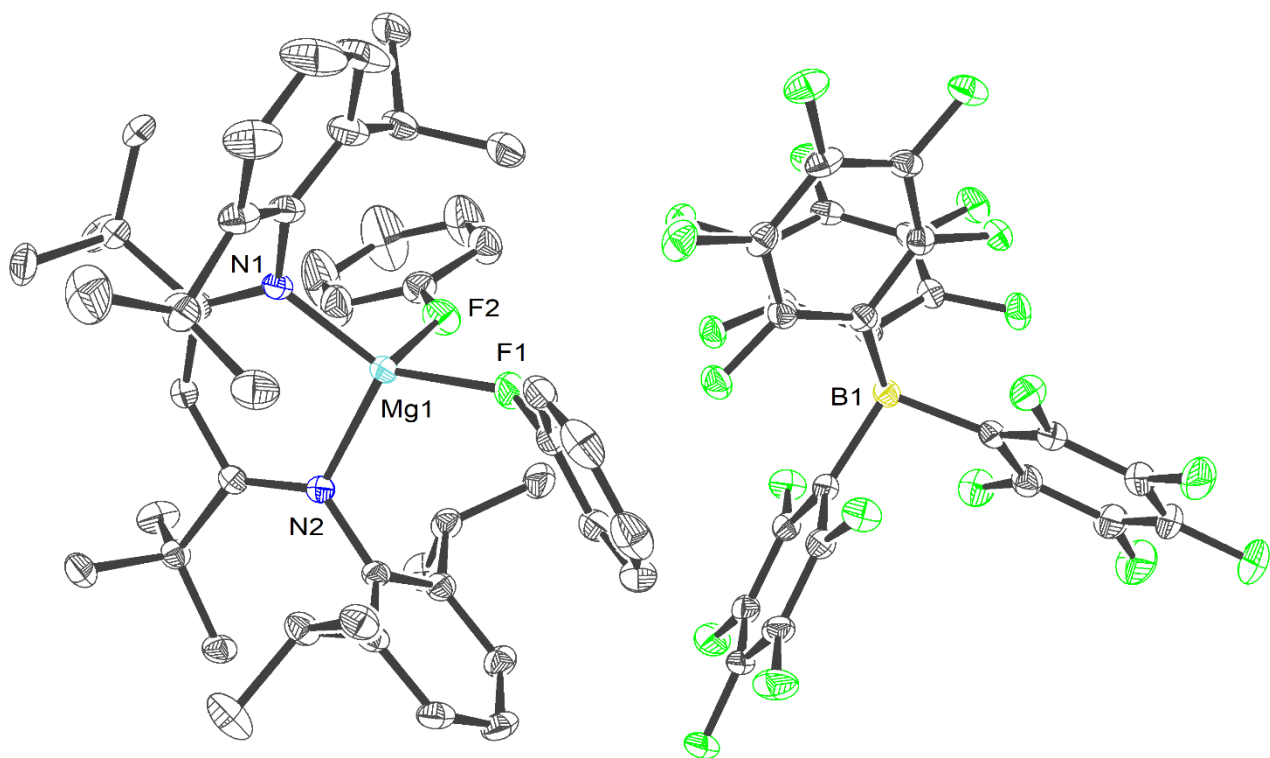

**Figure S25:** ORTEP representation of  $[(^t\text{BuBDI})\text{Mg}^+(\text{PhF})_2][\text{B}(\text{C}_6\text{F}_5)_4^-]$  (probability level 50%). Hydrogen atoms were emitted for clarity.

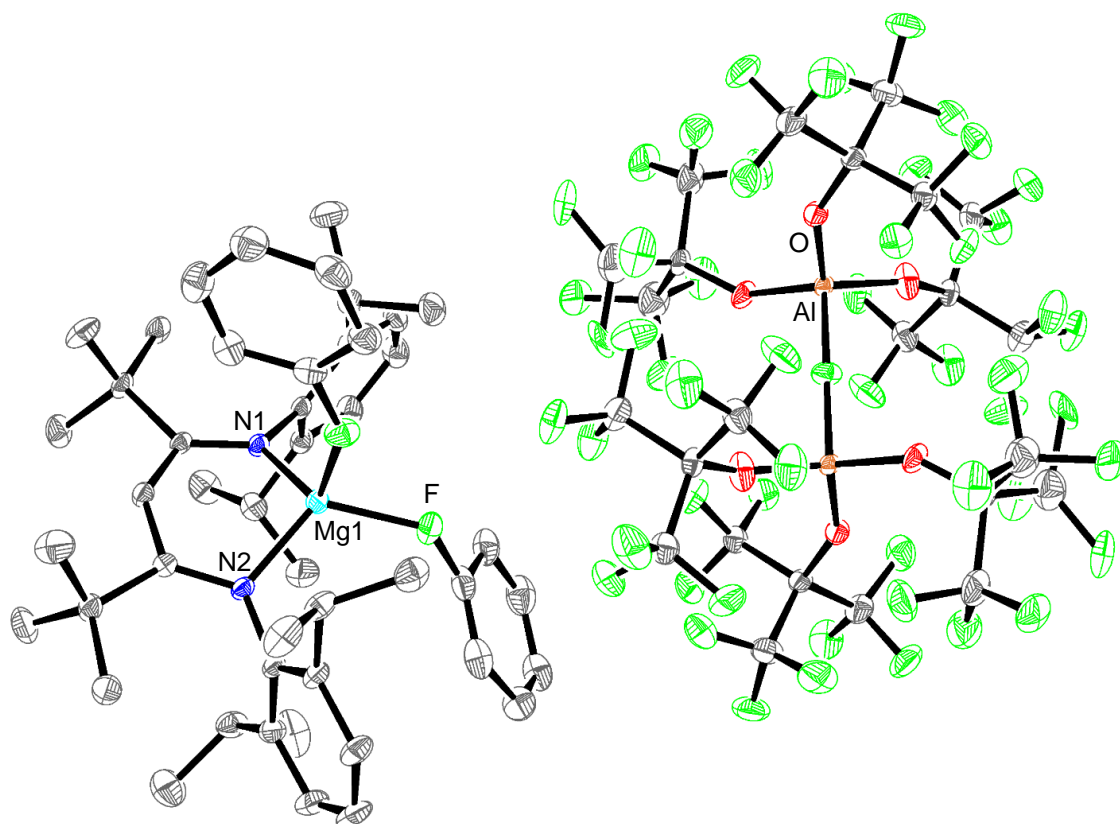

**Figure S26:** ORTEP representation of  $[(^t\text{BuBDI})\text{Mg}^+(\text{PhF})_2][\text{Al-F-Al}^-]$  (probability level 50%). Hydrogen atoms were emitted for clarity.

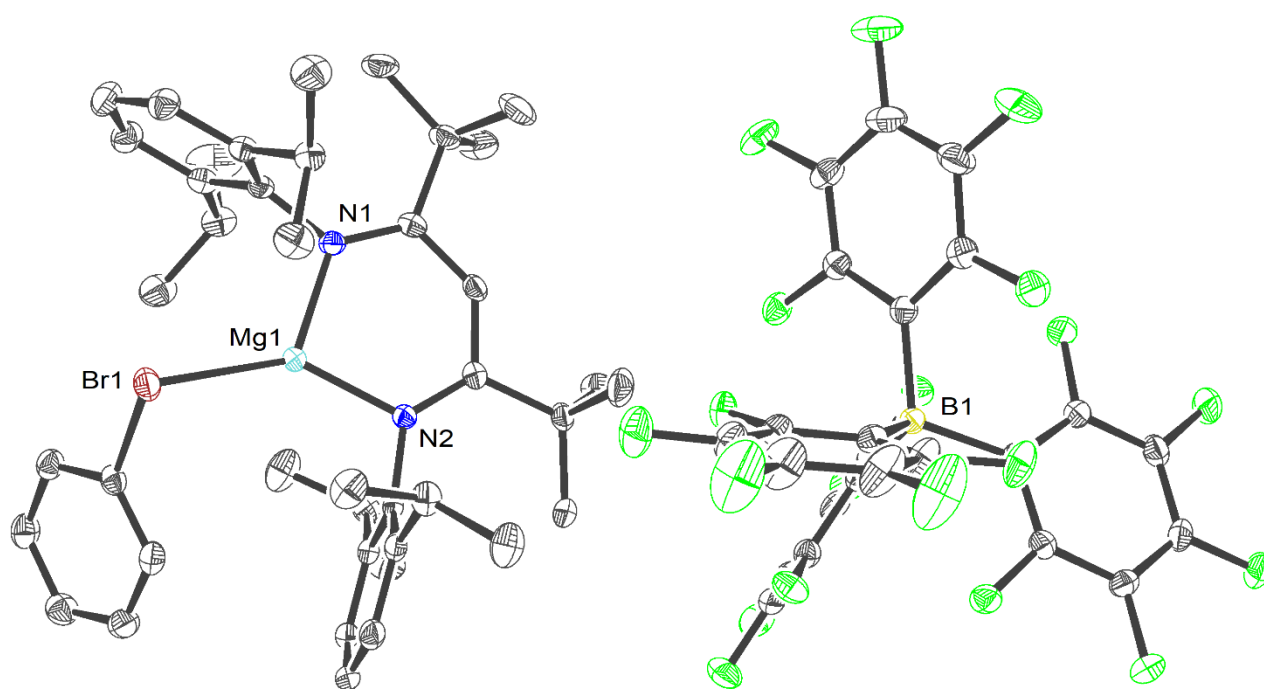

**Figure S27:** ORTEP representation of  $[(t\text{BuBDI})\text{Mg}^+\cdot\text{PhBr}][\text{B}(\text{C}_6\text{F}_5)_4^-]$  (probability level 50%). Hydrogen atoms were emitted for clarity.

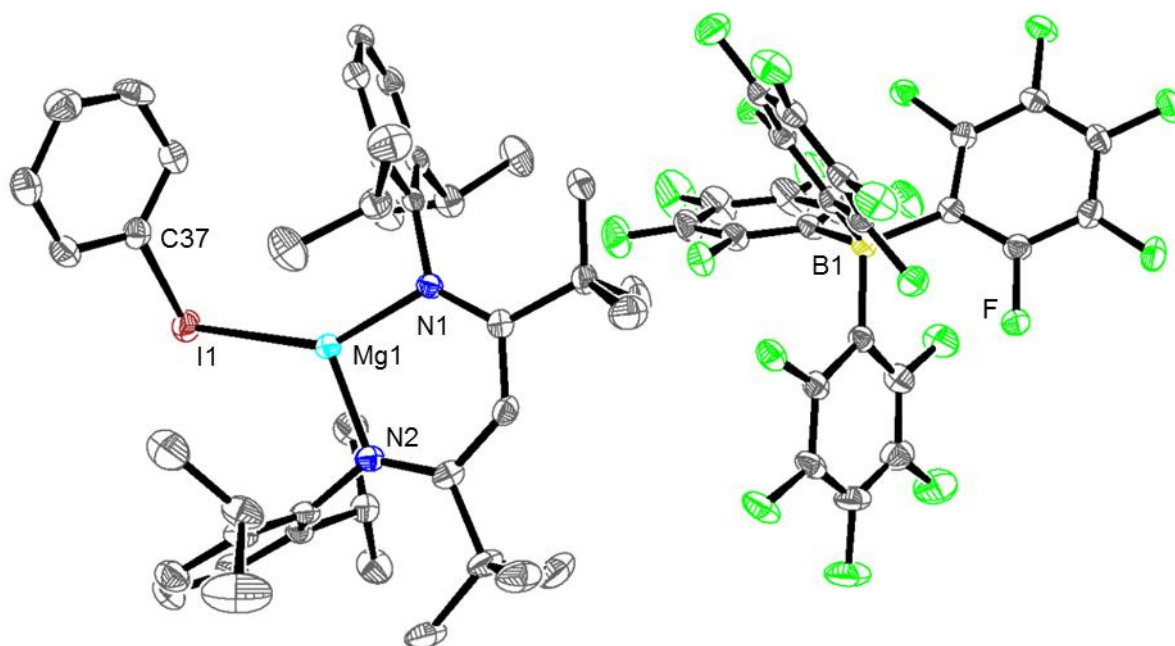

**Figure S28:** ORTEP representation of  $[(\text{MeBDI})\text{Mg}^+\cdot\text{PhI}][\text{B}(\text{C}_6\text{F}_5)_4^-]$  (probability level 50%). Hydrogen atoms were emitted for clarity.

### 1.3. Literature known metal-halobenzene complexes

**Table S2.** Literature compilation of known metal halobenzene complexes.

| <b>PhF</b>     | <b>GEQJET</b>        | <b>HOGHIV</b> | <b>NEBDAA</b> | <b>SAXSEQ</b>            | <b>SAXSIU</b> | <b>UHAVUU</b> | <b>TOQQEV</b> | <b>UPAQAF</b> | <b>YAWNAO</b> |
|----------------|----------------------|---------------|---------------|--------------------------|---------------|---------------|---------------|---------------|---------------|
| reference      | [S4]                 | [S5]          | [S6]          | [S7]                     | [S7]          | [S8]          | [S9]          | [S10]         | [S11]         |
|                | M = Mg               | M = Al        | M = Ti        | M = Sc                   | M = Ti        | M = Ti        | M = Li        | M = Ru        | M = Li        |
| M-F(Ph)        | 2.098(4)<br>2.085(4) | 1.8637(18)    | 2.1125(19)    | 2.2725(18)<br>2.2884(16) | 2.166(6)      | 2.1512(15)    | 1.866(7)      | 1.998(5)      | 1.892(7)      |
| C-F            | 1.346(5)<br>1.338(6) | 1.447(4)      | 1.418(3)      | 1.408(3)<br>1.414(3)     | 1.406(10)     | 1.402(3)      | (?)           | 1.328(8)      | 1.387(5)      |
| angle<br>M-F-C | 134.7(3)<br>166.8(3) | 129.98(15)    | 177.46(14)    | 172.21(16)<br>165.27(14) | 157.3(7)      | 168.17(16)    | 180 (?)       | 134.9(4)      | 151.7(3)      |

| <b>PhCl</b>     | <b>EZEVOU</b> | <b>EZEVUA</b> | <b>KUNLAI</b> | <b>MAMFOY</b> | <b>ROWNIC</b> | <b>XIXBIP(01)</b> |
|-----------------|---------------|---------------|---------------|---------------|---------------|-------------------|
| reference       | [S12]         | [S12]         | [S13]         | [S14]         | [S15]         | [S16] ([S17])     |
|                 | M = Re        | M = Re        | M = Zr        | M = Zr        | M = Rh        | M = Al            |
| M-Cl(Ph)        | 2.5613(12)    | 2.559(3)      | 2.7398(15)    | 2.6630(8)     | 2.5208(13)    | 2.540(3)          |
| C-Cl            | 1.763(4)      | 1.690(12)     | 1.767(7)      | 1.775(3)      | 1.758(6)      | 1.774(7)          |
| angle<br>M-Cl-C | 113.20(16)    | 114.2(4)      | 129.0(2)      | 120.66(10)    | 114.28(14)    | 102.7(2)          |

| <b>PhBr</b>     | <b>RAPVUZ</b> | <b>RUNWUU</b> |
|-----------------|---------------|---------------|
| reference       | [S18]         | [S19]         |
|                 | M = Pt        | M = Pd        |
| M-Br(Ph)        | 2.581(3)      | 2.5456(11)    |
| C-Br            | 1.92(3)       | 1.922(2)      |
| angle<br>M-Br-C | 116.4(6)      | 107.34(7)     |

| <b>PhI</b>     | <b>HAMRIW</b>        | <b>HAMRIV01</b>      | <b>PUDEX</b> | <b>RAPVOT</b> |
|----------------|----------------------|----------------------|--------------|---------------|
| reference      | [S20]                | [S21]                | [S21]        | [S18]         |
|                | M = Ag               | M = Ag               | M = Ag       | M = Pt        |
| M-I(Ph)        | 2.929(3)<br>2.971(2) | 2.927(2)<br>2.970(2) | 2.853(1)     | 2.696(2)      |
| C-I            | (?)                  | 2.093(26)            | 2.082(9)     | 2.123(8)      |
| angle<br>M-I-C | 101.6(8)<br>93.9(7)  | 102.3(7)<br>94.4(7)  | 99.0(2)      | 114.8(3)      |

## 1.4. Computational details

All geometry optimizations were carried out using Gaussian 16 Rev. A.0.3.<sup>S22</sup> All structures were fully optimized on B3LYP/def2TZVP level of theory.<sup>S23</sup> In all cases dispersion correction Grimme's third dispersion correction with Becke-Johnson damping (GD3BJ) was applied, unless indicated otherwise.<sup>S24</sup> In order to determine zero-point energies and to characterize the structures as minima, a frequency analysis has been calculated. Solvation effects were approximated using the PCM field of benzene.<sup>S25</sup> Molecules were drawn and evaluated using Molecules V2.311.<sup>S26</sup> Topological analyses were carried out using AIMAll V17 with the wavefunctions obtained from the B3LYP/def2TZVP calculations.<sup>S27, S28</sup>

### 1.4.1. Calculated structures (bond lengths, angles and energies)

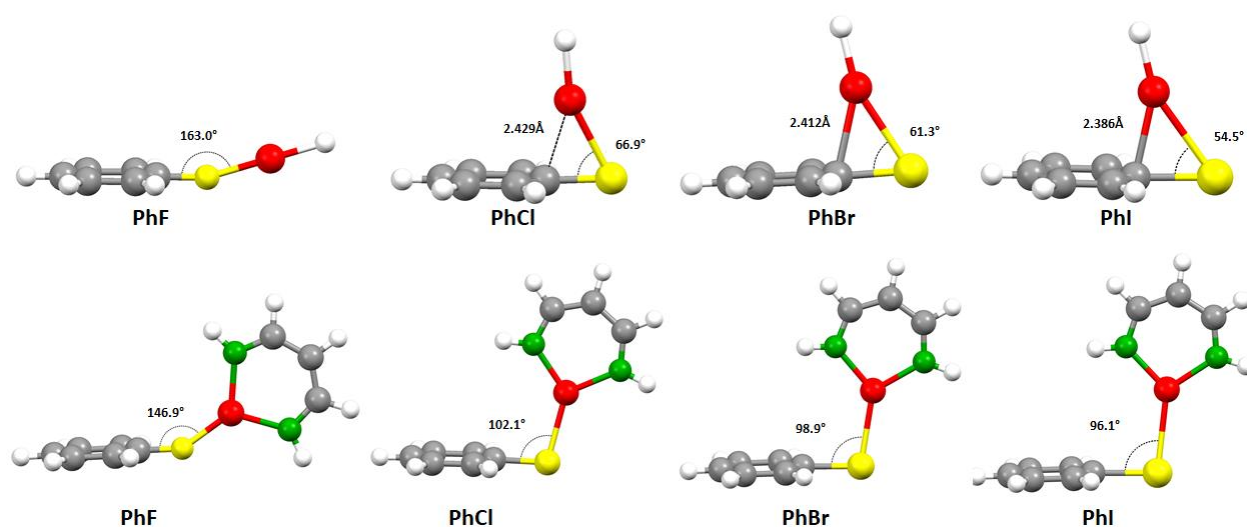

**Figure S29:** Calculated structures of  $\text{HMg}^+\cdot\text{PhX}$  and  $(^{\text{mini}}\text{BDI})\text{Mg}^+\cdot\text{PhX}$ , calculated without dispersion correction.

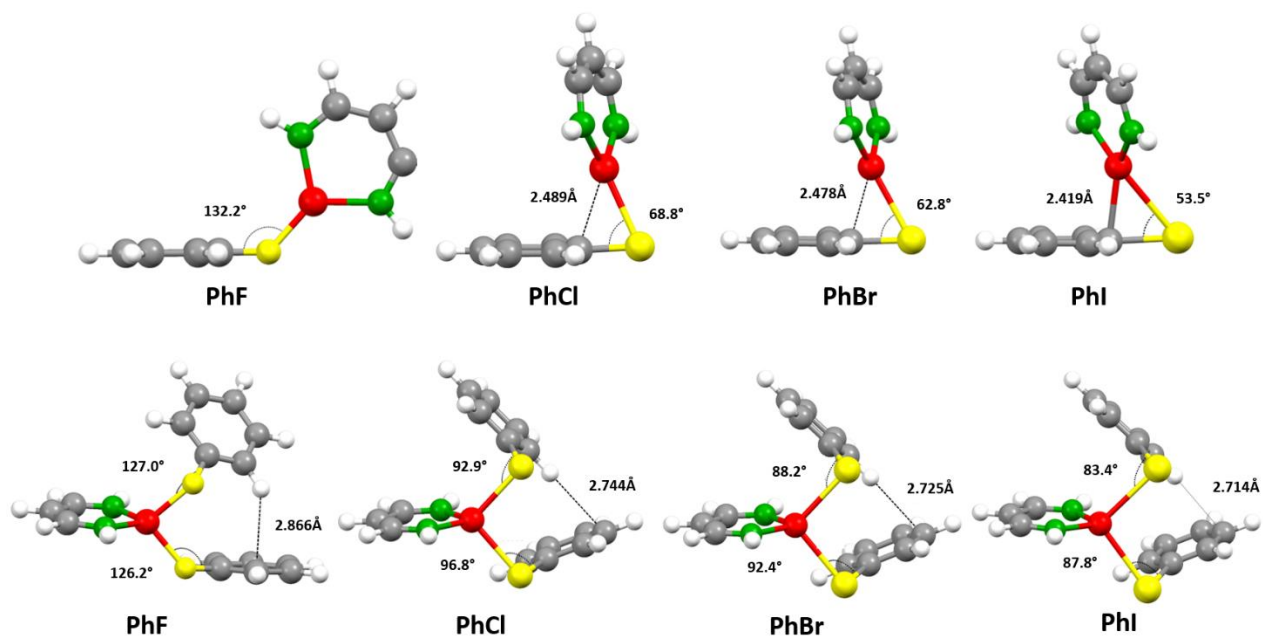

**Figure S30:** Calculated structures of  $(^{mini}BDI)Mg^+ \cdot PhX$  and  $(^{mini}BDI)Mg^+ \cdot (PhX)_2$  with dispersion correction.

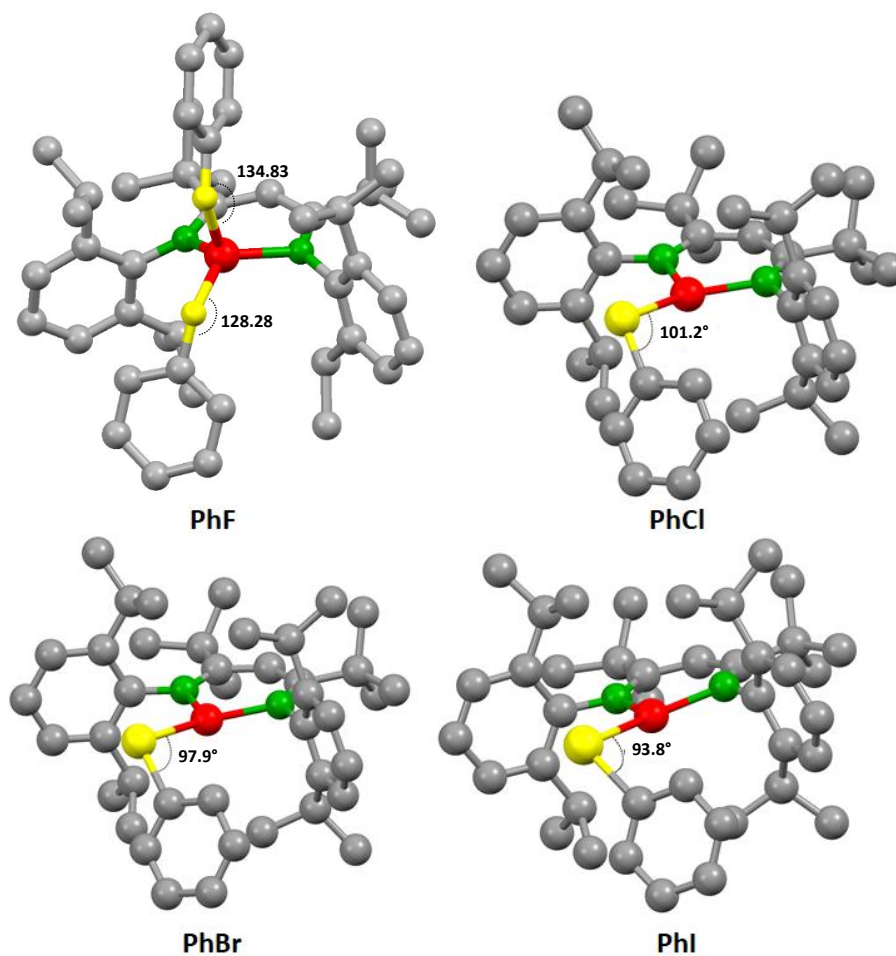

**Figure S31:** Calculated structures of  $(^{tBu}BDI)Mg^+ \cdot PhX$  with dispersion correction.



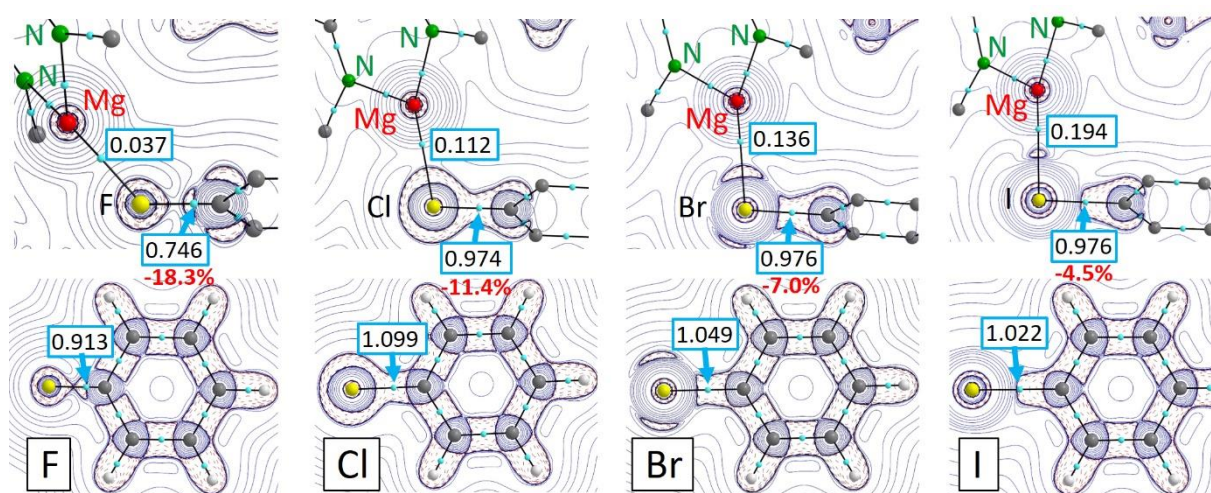

**Figure S32:** Contour plots of the negative Laplacian,  $-\nabla^2\rho(r)$ , for the cations  $(^t\text{BuBDI})\text{Mg}^+\cdots\text{XPh}$  ( $X = \text{F}, \text{Cl}, \text{Br}, \text{I}$ ) in the  $\text{Mg}\cdots\text{X}-\text{C}$  plane (top row) and for the free halobenzenes  $\text{PhX}$  in the molecule plane (middle row). Light-blue dots are bond-critical-points (BCP) and **boxed numbers show the Wiberg bond indices** calculated by the NBO program.  $(^t\text{BuBDI})\text{Mg}^+\cdots\text{XPh}$  coordination lead in all cases to weakening of the C-X bond. The percentage change (shown in red) is largest for C-F and gradually decreases down the group.

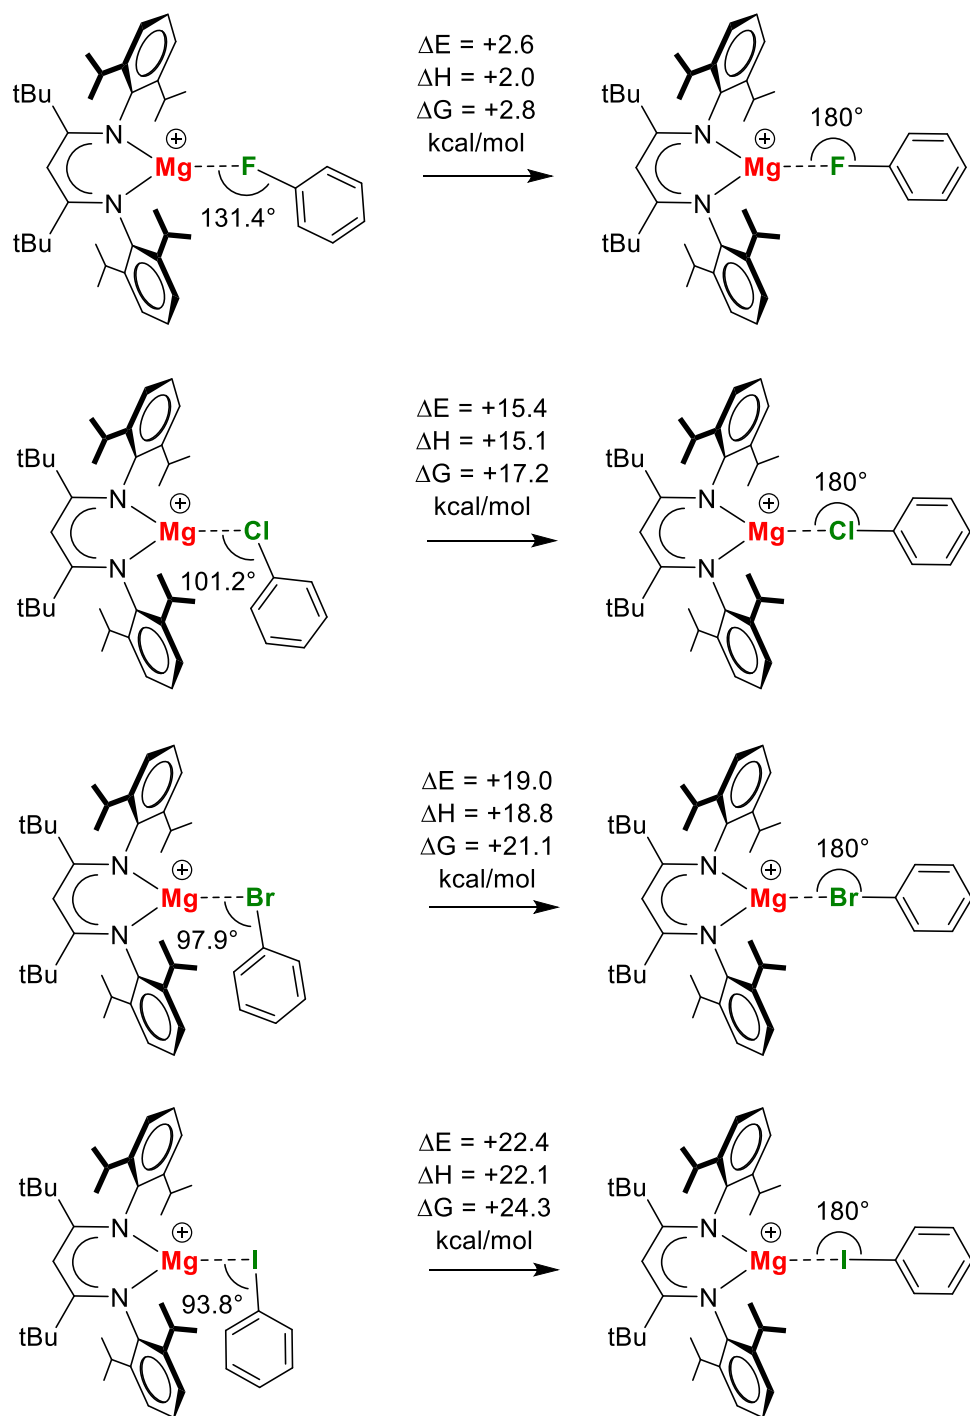

**Figure S33:** Energy needed for linearization of  $({}^{\text{tBu}}\text{BDI})\text{Mg}^+\cdots\text{XPh}$  ( $\text{X} = \text{F}, \text{Cl}, \text{Br}, \text{I}$ ) in kcal/mol, B3LYP/Def2TZVP GD3BJ;  $\Delta G$  at 298 K.



**Table 3:** Calculated energies for complexation of (BDI)Mg<sup>+</sup> with ligands (B3LYP/def2TZVP with dispersion correction)

|                          |                                                               | $\Delta E$ [kcal mol <sup>-1</sup> ] | $\Delta H$ [kcal mol <sup>-1</sup> ] | $\Delta G$ [kcal mol <sup>-1</sup> ] |
|--------------------------|---------------------------------------------------------------|--------------------------------------|--------------------------------------|--------------------------------------|
| (miniBDI)Mg <sup>+</sup> | C <sub>6</sub> H <sub>6</sub>                                 | -40.08                               | -39.07                               | -30.95                               |
|                          | C <sub>6</sub> H <sub>6</sub> solvent correction PCM, benzene | -14.38                               | -13.37                               | -5.25                                |
|                          | PhF                                                           | -34.29                               | -33.84                               | -26.92                               |
|                          | PhF solvent correction PCM, benzene                           | -14.22                               | -13.78                               | -6.85                                |
|                          | 2 PhF solvent correction PCM, benzene                         | -22.64                               | -21.31                               | -2.95                                |
|                          | PhCl                                                          | -35.44                               | -34.46                               | -26.54                               |
|                          | 2 PhCl solvent correction PCM, benzene                        | -16.57                               | -15.15                               | 4.30                                 |
|                          | PhBr                                                          | -36.48                               | -35.90                               | -27.63                               |
|                          | 2 PhBr solvent correction PCM, benzene                        | -16.02                               | -14.71                               | 4.79                                 |
|                          | PhI                                                           | -37.95                               | -37.33                               | -28.34                               |
|                          | 2 PhI solvent correction PCM, benzene                         | -14.64                               | -13.37                               | 6.99                                 |
| (tBuBDI)Mg <sup>+</sup>  | C <sub>6</sub> H <sub>6</sub>                                 | -28.59                               | -27.25                               | -15.90                               |
|                          | C <sub>6</sub> H <sub>6</sub> solvent correction PCM, benzene | -9.90                                | -8.56                                | 2.78                                 |
|                          | PhF                                                           | -22.95                               | -21.64                               | -9.04                                |
|                          | PhCl                                                          | -28.37                               | -27.96                               | -18.14                               |
|                          | PhBr                                                          | -29.59                               | -29.31                               | -19.46                               |
|                          | PhI                                                           | -30.98                               | -30.64                               | -20.06                               |
|                          | PhF solvent correction PCM, benzene                           | -13.02                               | -12.75                               | -2.65                                |
|                          | PhCl solvent correction PCM, benzene                          | -12.73                               | -12.32                               | -2.51                                |
|                          | PhBr solvent correction PCM, benzene                          | -12.09                               | -11.80                               | -1.95                                |
|                          | PhI solvent correction PCM, benzene                           | -11.24                               | -10.90                               | -0.33                                |

**Table 4:** Calculated linearization energies for  $(^{\text{mini}}\text{BDI})\text{Mg}^+\cdot\text{XPh}$  and  $(^{\text{tBu}}\text{BDI})\text{Mg}^+\cdot\text{XPh}$ , *i.e.* the energy needed to convert the bent minimum in a linear structure (B3LYP/def2TZVP without dispersion correction).

| complex                                                 | $\Delta E$ [kcal mol <sup>-1</sup> ] | $\Delta H$ [kcal mol <sup>-1</sup> ] | $\Delta G$ [kcal mol <sup>-1</sup> ] |
|---------------------------------------------------------|--------------------------------------|--------------------------------------|--------------------------------------|
| $(^{\text{mini}}\text{BDI})\text{Mg}^+\cdot\text{FPh}$  | 0.19                                 | 0.07                                 | 4.53                                 |
| $(^{\text{mini}}\text{BDI})\text{Mg}^+\cdot\text{ClPh}$ | 9.88                                 | 9.33                                 | 11.62                                |
| $(^{\text{mini}}\text{BDI})\text{Mg}^+\cdot\text{BrPh}$ | 12.49                                | 11.94                                | 14.68                                |
| $(^{\text{mini}}\text{BDI})\text{Mg}^+\cdot\text{IPh}$  | 16.21                                | 15.62                                | 21.34                                |
| $(^{\text{tBu}}\text{BDI})\text{Mg}^+\cdot\text{FPh}$   | 2.62                                 | 2.00                                 | 2.75                                 |
| $(^{\text{tBu}}\text{BDI})\text{Mg}^+\cdot\text{ClPh}$  | 15.43                                | 15.06                                | 17.16                                |
| $(^{\text{tBu}}\text{BDI})\text{Mg}^+\cdot\text{BrPh}$  | 19.03                                | 18.78                                | 21.09                                |
| $(^{\text{tBu}}\text{BDI})\text{Mg}^+\cdot\text{IPh}$   | 22.44                                | 22.06                                | 24.34                                |

#### 1.4.2. XYZ coordinates

XYZ-Files:

```

14
PhF—Mg+H, O.D.
C    0.115933    -0.024191    0.000000
F    0.122698    1.448319    0.000000
C    0.120297    -0.628384    1.227651
C    0.120297    -0.628384    -1.227651
C    0.120297    -2.023150    1.208828
C    0.120297    -2.023150    -1.208828
C    0.119554    -2.710955    0.000000
H    0.128668    -0.067861    2.151621
H    0.128668    -0.067861    -2.151621
H    0.123643    -2.561594    2.146678
H    0.123643    -2.561594    -2.146678
H    0.120945    -3.792343    0.000000
Mg   -0.427424    3.281642    0.000000
H    -0.900810    4.865959    0.000000

```

```

14
PhCl—Mg+H, O.D.
C    -0.137176    -0.424540    -0.294938
Cl   -1.887391    -0.757923    -0.493315
C    0.599351    -1.185317    0.607549
C    1.943759    -0.867541    0.778270
C    2.520765    0.183491    0.069763
C    0.415528    0.630248    -1.025954
C    1.763525    0.929587    -0.825793

```

|    |           |           |           |
|----|-----------|-----------|-----------|
| H  | 0.144105  | -2.006083 | 1.144976  |
| H  | 2.539219  | -1.451310 | 1.467660  |
| H  | 3.567136  | 0.417071  | 0.213172  |
| H  | -0.164889 | 1.155301  | -1.775733 |
| H  | 2.215047  | 1.735441  | -1.388929 |
| Mg | -1.426407 | 1.245670  | 0.909398  |
| H  | -1.732593 | 2.490668  | 1.959054  |

14

PhBr—Mg+H, O.D.

|    |           |           |           |
|----|-----------|-----------|-----------|
| C  | 0.227843  | -0.360651 | -0.000393 |
| Br | -1.725772 | -0.463376 | -0.000503 |
| C  | 0.895396  | -0.312720 | 1.224314  |
| C  | 2.284331  | -0.199386 | 1.207429  |
| C  | 2.972845  | -0.141905 | -0.000173 |
| C  | 0.895332  | -0.309355 | -1.225007 |
| C  | 2.284271  | -0.196057 | -1.207891 |
| H  | 0.356938  | -0.393177 | 2.159391  |
| H  | 2.821762  | -0.168171 | 2.145977  |
| H  | 4.051371  | -0.058770 | -0.000085 |
| H  | 0.356830  | -0.387315 | -2.160273 |
| H  | 2.821650  | -0.162262 | -2.146380 |
| Mg | -0.580189 | 1.912281  | 0.002096  |
| H  | -0.404394 | 3.560920  | 0.004124  |

14

PhI—Mg+H, O.D.

|    |           |           |           |
|----|-----------|-----------|-----------|
| C  | -0.559277 | -0.327943 | 0.001285  |
| I  | 1.590634  | -0.265061 | 0.001147  |
| C  | -1.241897 | -0.324623 | 1.223412  |
| C  | -1.242148 | -0.338569 | -1.220762 |
| C  | -2.635964 | -0.331625 | 1.208093  |
| C  | -2.636064 | -0.345454 | -1.205050 |
| C  | -3.328318 | -0.342346 | 0.001642  |
| H  | -0.705673 | -0.347593 | 2.163018  |
| H  | -0.705913 | -0.371731 | -2.160022 |
| H  | -3.173285 | -0.337801 | 2.147388  |
| H  | -3.173701 | -0.362381 | -2.144040 |
| H  | -4.410041 | -0.351038 | 0.001677  |
| Mg | -0.141272 | 2.021597  | -0.008619 |
| H  | -0.577741 | 3.622959  | -0.017089 |

23

PhF—miniNacNacMg+, O.D., bent

|   |          |           |           |
|---|----------|-----------|-----------|
| C | 1.969149 | -0.359099 | -0.042484 |
| F | 0.593522 | -0.798033 | -0.097739 |
| C | 2.559009 | -0.335213 | 1.194961  |
| C | 3.889084 | 0.080009  | 1.230781  |
| C | 4.546493 | 0.436299  | 0.058108  |
| C | 2.559480 | -0.029364 | -1.235197 |
| C | 3.889599 | 0.381728  | -1.166538 |
| H | 2.026891 | -0.630446 | 2.088412  |

|    |           |           |           |
|----|-----------|-----------|-----------|
| H  | 4.404936  | 0.117114  | 2.180518  |
| H  | 5.579284  | 0.754332  | 0.098363  |
| H  | 2.027680  | -0.093928 | -2.174128 |
| H  | 4.405815  | 0.652907  | -2.077289 |
| Mg | -1.289796 | -0.287845 | -0.037109 |
| N  | -2.861747 | -1.451254 | -0.106126 |
| N  | -2.115072 | 1.481061  | 0.105551  |
| C  | -4.061921 | -0.879107 | -0.049880 |
| C  | -3.445363 | 1.545593  | 0.125216  |
| C  | -4.346392 | 0.483249  | 0.055466  |
| H  | -5.393130 | 0.747298  | 0.086886  |
| H  | -4.925582 | -1.539466 | -0.089814 |
| H  | -3.889258 | 2.535645  | 0.204579  |
| H  | -2.925220 | -2.457787 | -0.181098 |
| H  | -1.692658 | 2.397555  | 0.169957  |

23

PhCl—miniNacNacMg+, O.D., bent

|    |           |           |           |
|----|-----------|-----------|-----------|
| C  | 1.960374  | -0.595296 | 0.000199  |
| Cl | 0.667480  | -1.856266 | 0.000589  |
| C  | 2.440591  | -0.160041 | 1.221813  |
| C  | 3.462637  | 0.784833  | 1.206621  |
| C  | 3.969027  | 1.254457  | -0.000357 |
| C  | 2.440933  | -0.161146 | -1.221675 |
| C  | 3.462974  | 0.783744  | -1.207051 |
| H  | 2.052072  | -0.547739 | 2.153011  |
| H  | 3.864250  | 1.143040  | 2.145056  |
| H  | 4.767032  | 1.984684  | -0.000575 |
| H  | 2.052672  | -0.549682 | -2.152631 |
| H  | 3.864850  | 1.141102  | -2.145698 |
| Mg | -1.356452 | -0.511588 | -0.000147 |
| N  | -3.213612 | -1.143514 | -0.000243 |
| N  | -1.618311 | 1.430997  | -0.000083 |
| C  | -4.185691 | -0.235279 | -0.000179 |
| C  | -2.865969 | 1.896329  | -0.000047 |
| C  | -4.046336 | 1.153595  | -0.000074 |
| H  | -4.964583 | 1.722156  | -0.000028 |
| H  | -5.208450 | -0.606444 | -0.000214 |
| H  | -2.989263 | 2.977369  | 0.000010  |
| H  | -3.579063 | -2.086626 | -0.000332 |
| H  | -0.937047 | 2.178149  | -0.000063 |

23

PhBr—miniNacNacMg+, O.D., bent

|    |          |           |           |
|----|----------|-----------|-----------|
| C  | 1.955973 | -0.233929 | -0.000060 |
| Br | 0.647115 | -1.697603 | -0.000257 |
| C  | 2.406401 | 0.231476  | 1.221817  |
| C  | 3.365166 | 1.241427  | 1.206587  |
| C  | 3.839808 | 1.743839  | 0.000189  |
| C  | 2.406034 | 0.232132  | -1.221822 |
| C  | 3.364803 | 1.242076  | -1.206337 |
| H  | 2.045110 | -0.176433 | 2.155027  |

|    |           |           |           |
|----|-----------|-----------|-----------|
| H  | 3.741951  | 1.624514  | 2.145652  |
| H  | 4.588506  | 2.524600  | 0.000286  |
| H  | 2.044462  | -0.175274 | -2.155143 |
| H  | 3.741306  | 1.625667  | -2.145309 |
| Mg | -1.521820 | -0.296835 | 0.000319  |
| N  | -3.379720 | -0.933582 | 0.000312  |
| N  | -1.798285 | 1.646011  | 0.000080  |
| C  | -4.356669 | -0.030806 | 0.000105  |
| C  | -3.047419 | 2.106435  | -0.000086 |
| C  | -4.224634 | 1.358672  | -0.000088 |
| H  | -5.145582 | 1.922859  | -0.000245 |
| H  | -5.377502 | -0.407377 | 0.000083  |
| H  | -3.175323 | 3.186999  | -0.000235 |
| H  | -3.740681 | -1.878438 | 0.000431  |
| H  | -1.120188 | 2.396087  | 0.000053  |

23

PhI—miniNacNacMg+, O.D., bent

|    |           |           |           |
|----|-----------|-----------|-----------|
| C  | 1.975122  | 0.110608  | 0.000044  |
| I  | 0.662267  | -1.591159 | -0.000360 |
| C  | 2.395445  | 0.614909  | 1.220302  |
| C  | 3.279101  | 1.691318  | 1.206137  |
| C  | 3.716989  | 2.227163  | 0.000547  |
| C  | 2.394920  | 0.615920  | -1.219975 |
| C  | 3.278580  | 1.692320  | -1.205299 |
| H  | 2.066024  | 0.189356  | 2.157444  |
| H  | 3.626209  | 2.100750  | 2.145718  |
| H  | 4.407449  | 3.059979  | 0.000739  |
| H  | 2.065112  | 0.191128  | -2.157327 |
| H  | 3.625288  | 2.102531  | -2.144689 |
| Mg | -1.719321 | -0.129105 | 0.000138  |
| N  | -3.576162 | -0.777668 | 0.000983  |
| N  | -2.021240 | 1.812955  | -0.000658 |
| C  | -4.562277 | 0.114898  | 0.000806  |
| C  | -3.273425 | 2.263346  | -0.000561 |
| C  | -4.444258 | 1.505412  | 0.000093  |
| H  | -5.370435 | 2.060965  | 0.000056  |
| H  | -5.579323 | -0.271951 | 0.001267  |
| H  | -3.410498 | 3.342856  | -0.001038 |
| H  | -3.928341 | -1.725845 | 0.001562  |
| H  | -1.349157 | 2.568517  | -0.001168 |

23

PhF—miniNacNacMg+, O.D., linear

|   |          |           |           |
|---|----------|-----------|-----------|
| C | 0.000000 | 0.000000  | -2.038537 |
| F | 0.000000 | 0.000000  | -0.593762 |
| C | 0.000000 | 1.224774  | -2.653856 |
| C | 0.000000 | -1.224774 | -2.653856 |
| C | 0.000000 | 1.208126  | -4.047664 |
| C | 0.000000 | -1.208126 | -4.047664 |
| C | 0.000000 | 0.000000  | -4.736785 |
| H | 0.000000 | 2.148134  | -2.091964 |

|    |           |           |           |
|----|-----------|-----------|-----------|
| H  | 0.000000  | -2.148134 | -2.091964 |
| H  | 0.000000  | 2.145851  | -4.586409 |
| H  | 0.000000  | -2.145851 | -4.586409 |
| H  | 0.000000  | 0.000000  | -5.818220 |
| Mg | 0.000000  | 0.000000  | 1.347364  |
| N  | 1.515493  | 0.000000  | 2.585561  |
| N  | -1.515493 | 0.000000  | 2.585561  |
| C  | 1.253799  | 0.000000  | 3.890967  |
| C  | -1.253799 | 0.000000  | 3.890967  |
| C  | 0.000000  | 0.000000  | 4.503156  |
| H  | 0.000000  | 0.000000  | 5.583199  |
| H  | 2.107849  | 0.000000  | 4.564934  |
| H  | -2.107849 | 0.000000  | 4.564934  |
| H  | 2.509528  | 0.000000  | 2.399581  |
| H  | -2.509528 | 0.000000  | 2.399581  |

23

PhCl—miniNacNacMg+, O.D., linear

|    |           |           |           |
|----|-----------|-----------|-----------|
| C  | 0.000000  | 0.000000  | 2.444348  |
| Cl | 0.000000  | 0.000000  | 0.620200  |
| C  | 0.000000  | 1.225471  | 3.074041  |
| C  | 0.000000  | -1.225471 | 3.074041  |
| C  | 0.000000  | 1.206743  | 4.466918  |
| C  | 0.000000  | -1.206743 | 4.466918  |
| C  | 0.000000  | 0.000000  | 5.157112  |
| H  | 0.000000  | 2.153787  | 2.522595  |
| H  | 0.000000  | -2.153787 | 2.522595  |
| H  | 0.000000  | 2.146044  | 5.003612  |
| H  | 0.000000  | -2.146044 | 5.003612  |
| H  | 0.000000  | 0.000000  | 6.238699  |
| Mg | 0.000000  | 0.000000  | -1.805041 |
| N  | -1.515383 | 0.000000  | -3.041353 |
| N  | 1.515383  | 0.000000  | -3.041353 |
| C  | -1.253742 | 0.000000  | -4.346553 |
| C  | 1.253742  | 0.000000  | -4.346553 |
| C  | 0.000000  | 0.000000  | -4.958757 |
| H  | 0.000000  | 0.000000  | -6.038768 |
| H  | -2.108139 | 0.000000  | -5.020118 |
| H  | 2.108139  | 0.000000  | -5.020118 |
| H  | -2.508818 | 0.000000  | -2.852582 |
| H  | 2.508818  | 0.000000  | -2.852582 |

23

PhBr—miniNacNacMg+, O.D., linear

|    |          |           |          |
|----|----------|-----------|----------|
| C  | 0.000000 | 0.000000  | 2.527066 |
| Br | 0.000000 | 0.000000  | 0.541332 |
| C  | 0.000000 | 1.226726  | 3.152234 |
| C  | 0.000000 | -1.226726 | 3.152234 |
| C  | 0.000000 | 1.206490  | 4.546162 |
| C  | 0.000000 | -1.206490 | 4.546162 |
| C  | 0.000000 | 0.000000  | 5.236215 |
| H  | 0.000000 | 2.156803  | 2.604338 |

|    |           |           |           |
|----|-----------|-----------|-----------|
| H  | 0.000000  | -2.156803 | 2.604338  |
| H  | 0.000000  | 2.146592  | 5.081743  |
| H  | 0.000000  | -2.146592 | 5.081743  |
| H  | 0.000000  | 0.000000  | 6.317820  |
| Mg | 0.000000  | 0.000000  | -2.042777 |
| N  | -1.515283 | 0.000000  | -3.279529 |
| N  | 1.515283  | 0.000000  | -3.279529 |
| C  | -1.253777 | 0.000000  | -4.584678 |
| C  | 1.253777  | 0.000000  | -4.584678 |
| C  | 0.000000  | 0.000000  | -5.196931 |
| H  | 0.000000  | 0.000000  | -6.276948 |
| H  | -2.108364 | 0.000000  | -5.258034 |
| H  | 2.108364  | 0.000000  | -5.258034 |
| H  | -2.508501 | 0.000000  | -3.089782 |
| H  | 2.508501  | 0.000000  | -3.089782 |

23

PhI—miniNacNacMg+, O.D., linear

|    |           |           |           |
|----|-----------|-----------|-----------|
| I  | 0.000000  | 0.000000  | 0.494692  |
| Mg | 0.000000  | 0.000000  | -2.314501 |
| N  | 0.000000  | 1.514976  | -3.552441 |
| N  | 0.000000  | -1.514976 | -3.552441 |
| C  | 0.000000  | 0.000000  | 2.671214  |
| C  | 1.226403  | 0.000000  | 3.300501  |
| C  | -1.226403 | 0.000000  | 3.300501  |
| C  | 1.205814  | 0.000000  | 4.695101  |
| C  | -1.205814 | 0.000000  | 4.695101  |
| C  | 0.000000  | 0.000000  | 5.385403  |
| C  | 0.000000  | 1.253625  | -4.857411 |
| C  | 0.000000  | -1.253625 | -4.857411 |
| C  | 0.000000  | 0.000000  | -5.469852 |
| H  | 2.159959  | 0.000000  | 2.758825  |
| H  | -2.159959 | 0.000000  | 2.758825  |
| H  | 2.146583  | 0.000000  | 5.229936  |
| H  | -2.146583 | 0.000000  | 5.229936  |
| H  | 0.000000  | 0.000000  | 6.467089  |
| H  | 0.000000  | 0.000000  | -6.549849 |
| H  | 0.000000  | 2.108436  | -5.530564 |
| H  | 0.000000  | -2.108436 | -5.530564 |
| H  | 0.000000  | 2.507984  | -3.361503 |
| H  | 0.000000  | -2.507984 | -3.361503 |

23

PhF—miniNacNacMg+, Dispersion, bent

|   |          |           |           |
|---|----------|-----------|-----------|
| C | 1.881337 | -0.543510 | 0.000031  |
| F | 0.589998 | -1.187430 | 0.000066  |
| C | 2.435813 | -0.273101 | 1.224332  |
| C | 3.682577 | 0.349061  | 1.208122  |
| C | 4.297895 | 0.657754  | -0.000035 |
| C | 2.435843 | -0.273294 | -1.224300 |
| C | 3.682606 | 0.348870  | -1.208158 |
| H | 1.939569 | -0.540086 | 2.146666  |

|    |           |           |           |
|----|-----------|-----------|-----------|
| H  | 4.168136  | 0.583279  | 2.145176  |
| H  | 5.266736  | 1.137370  | -0.000061 |
| H  | 1.939621  | -0.540425 | -2.146603 |
| H  | 4.168187  | 0.582941  | -2.145237 |
| Mg | -1.228399 | -0.478767 | 0.000023  |
| N  | -2.961858 | -1.383082 | 0.000052  |
| N  | -1.769198 | 1.400457  | -0.000057 |
| C  | -4.058756 | -0.629478 | 0.000017  |
| C  | -3.072326 | 1.675073  | -0.000074 |
| C  | -4.127696 | 0.763973  | -0.000041 |
| H  | -5.120311 | 1.188785  | -0.000063 |
| H  | -5.014111 | -1.149273 | 0.000034  |
| H  | -3.355205 | 2.725258  | -0.000118 |
| H  | -3.181377 | -2.370089 | 0.000092  |
| H  | -1.206814 | 2.240591  | -0.000089 |

23

PhCl—miniNacNacMg+, Dispersion, bent

|    |           |           |           |
|----|-----------|-----------|-----------|
| C  | -1.741188 | 0.588300  | -0.097091 |
| Cl | -1.082057 | 2.175934  | -0.592358 |
| C  | -1.758679 | 0.272376  | 1.259516  |
| C  | -2.206738 | -0.993712 | 1.627754  |
| C  | -2.630586 | -1.896887 | 0.660621  |
| C  | -2.166446 | -0.293347 | -1.084280 |
| C  | -2.614242 | -1.547244 | -0.686247 |
| H  | -1.460141 | 0.998791  | 2.003484  |
| H  | -2.232742 | -1.260822 | 2.675250  |
| H  | -2.980938 | -2.875905 | 0.957050  |
| H  | -2.155219 | -0.004131 | -2.125678 |
| H  | -2.956165 | -2.248514 | -1.435135 |
| Mg | 0.746461  | 0.530232  | -0.168573 |
| N  | 2.163405  | 0.811041  | 1.161822  |
| N  | 1.594576  | -0.827634 | -1.304644 |
| C  | 3.290657  | 0.114244  | 1.052348  |
| C  | 2.818515  | -1.246872 | -0.995644 |
| C  | 3.606282  | -0.832238 | 0.077592  |
| H  | 4.579069  | -1.293383 | 0.159818  |
| H  | 4.059790  | 0.296181  | 1.799825  |
| H  | 3.264000  | -1.996519 | -1.646017 |
| H  | 2.187796  | 1.441772  | 1.951704  |
| H  | 1.240672  | -1.282708 | -2.135005 |

23

PhBr—miniNacNacMg+, Dispersion, bent

|    |          |           |           |
|----|----------|-----------|-----------|
| C  | 1.601352 | 0.092692  | 0.055677  |
| Br | 1.390776 | -1.829115 | -0.192456 |
| C  | 1.490679 | 0.616286  | 1.343333  |
| C  | 1.582308 | 1.997599  | 1.497621  |
| C  | 1.790667 | 2.815823  | 0.393984  |
| C  | 1.819106 | 0.890541  | -1.064075 |
| C  | 1.911852 | 2.265176  | -0.877962 |
| H  | 1.360173 | -0.031432 | 2.199462  |



|    |           |           |           |
|----|-----------|-----------|-----------|
| H  | 1.500653  | 2.424266  | 2.487983  |
| H  | 1.864413  | 3.886554  | 0.525306  |
| H  | 1.920809  | 0.452191  | -2.046710 |
| H  | 2.085944  | 2.903196  | -1.733746 |
| Mg | -0.830685 | -0.366033 | -0.059603 |
| N  | -2.207326 | -0.650238 | 1.314714  |
| N  | -1.897129 | 0.556281  | -1.428014 |
| C  | -3.444411 | -0.221799 | 1.084009  |
| C  | -3.187126 | 0.780876  | -1.195297 |
| C  | -3.910088 | 0.437740  | -0.053499 |
| H  | -4.955592 | 0.707286  | -0.052960 |
| H  | -4.184276 | -0.401881 | 1.860986  |
| H  | -3.750410 | 1.288001  | -1.975720 |
| H  | -2.130875 | -1.108839 | 2.212589  |
| H  | -1.614614 | 0.900177  | -2.335652 |

23

PhI—miniNacNacMg+, Dispersion, bent

|    |           |           |           |
|----|-----------|-----------|-----------|
| I  | -1.852232 | -1.212406 | -0.138539 |
| Mg | 0.962262  | -0.264999 | 0.021945  |
| N  | 2.234530  | 0.365842  | -1.338619 |
| N  | 2.198749  | -1.232062 | 1.209913  |
| C  | -0.719713 | 2.967566  | -0.794057 |
| H  | -0.725496 | 3.652763  | -1.631202 |
| C  | -0.729243 | 1.208878  | 1.373573  |
| H  | -0.776498 | 0.541997  | 2.224767  |
| C  | 4.115663  | -0.687840 | -0.198010 |
| H  | 5.182682  | -0.834098 | -0.274202 |
| C  | -0.235205 | 2.505175  | 1.521007  |
| H  | 0.132609  | 2.823372  | 2.487056  |
| C  | 3.521514  | 0.055247  | -1.217281 |
| C  | -1.206613 | 1.677334  | -0.970799 |
| H  | -1.581922 | 1.357672  | -1.932547 |
| C  | -0.230058 | 3.379036  | 0.441941  |
| H  | 0.150717  | 4.383656  | 0.563719  |
| C  | 3.491001  | -1.273878 | 0.903289  |
| C  | -1.204921 | 0.805722  | 0.119283  |
| H  | 4.194401  | 0.414974  | -1.992863 |
| H  | 2.056608  | 0.910942  | -2.171079 |
| H  | 1.997198  | -1.748709 | 2.055420  |
| H  | 4.143332  | -1.824957 | 1.577439  |

35

(PhF)2—miniNacNacMg+, Dispersion

|   |           |          |           |
|---|-----------|----------|-----------|
| C | -0.522347 | 1.633201 | -0.783372 |
| F | 0.193092  | 0.534426 | -1.334826 |
| C | 0.196982  | 2.762044 | -0.476052 |
| C | -0.516921 | 3.826781 | 0.068033  |
| C | -1.887755 | 3.719615 | 0.275881  |
| C | -1.873431 | 1.470307 | -0.603037 |
| C | -2.562489 | 2.550499 | -0.057925 |
| H | 1.261390  | 2.816572 | -0.654343 |

|    |           |           |           |
|----|-----------|-----------|-----------|
| H  | 0.004529  | 4.739181  | 0.322065  |
| H  | -2.433295 | 4.553442  | 0.695462  |
| H  | -2.368986 | 0.550480  | -0.875395 |
| H  | -3.629348 | 2.472264  | 0.099213  |
| Mg | 1.537680  | -0.631921 | -0.393655 |
| N  | 3.297836  | -1.063495 | -1.173153 |
| N  | 2.129844  | 0.191039  | 1.302608  |
| C  | 4.398547  | -0.789307 | -0.484372 |
| C  | 3.430008  | 0.257932  | 1.573266  |
| C  | 4.480765  | -0.188018 | 0.773448  |
| H  | 5.475139  | -0.048706 | 1.170463  |
| H  | 5.349833  | -1.056012 | -0.940407 |
| H  | 3.718919  | 0.712239  | 2.518963  |
| H  | 3.511799  | -1.498638 | -2.060564 |
| H  | 1.575368  | 0.604009  | 2.040362  |
| C  | -1.172471 | -2.020843 | 0.025853  |
| F  | 0.194775  | -2.137355 | -0.319360 |
| C  | -1.467838 | -1.620808 | 1.306615  |
| C  | -2.816423 | -1.480652 | 1.624424  |
| C  | -3.792431 | -1.744765 | 0.670164  |
| C  | -2.093141 | -2.300826 | -0.953860 |
| C  | -3.434963 | -2.156222 | -0.610062 |
| H  | -0.686148 | -1.439102 | 2.031228  |
| H  | -3.096917 | -1.172062 | 2.621866  |
| H  | -4.837244 | -1.639373 | 0.927479  |
| H  | -1.781781 | -2.620529 | -1.938072 |
| H  | -4.196524 | -2.370777 | -1.346997 |

35

(PhCl)<sub>2</sub>—miniNacNacMg<sup>+</sup>, Dispersion

|    |           |           |           |
|----|-----------|-----------|-----------|
| C  | 0.113007  | 1.848878  | -1.045882 |
| Cl | 0.226932  | 0.458512  | -2.164177 |
| C  | 1.176678  | 2.729618  | -0.986361 |
| C  | 1.091795  | 3.784661  | -0.084794 |
| C  | -0.030463 | 3.930829  | 0.723055  |
| C  | -1.021585 | 1.964927  | -0.264650 |
| C  | -1.082473 | 3.026347  | 0.631813  |
| H  | 2.044416  | 2.599639  | -1.616596 |
| H  | 1.907746  | 4.491278  | -0.018852 |
| H  | -0.087428 | 4.755314  | 1.420503  |
| H  | -1.832299 | 1.257825  | -0.349803 |
| H  | -1.960438 | 3.144291  | 1.252378  |
| Mg | 1.220247  | -1.021994 | -0.423118 |
| N  | 3.031940  | -1.785247 | -0.643670 |
| N  | 1.495662  | -0.087645 | 1.299342  |
| C  | 3.948843  | -1.581098 | 0.294103  |
| C  | 2.673599  | -0.154467 | 1.906544  |
| C  | 3.804748  | -0.844709 | 1.471288  |
| H  | 4.673529  | -0.791597 | 2.110203  |
| H  | 4.928514  | -2.028352 | 0.137450  |
| H  | 2.784158  | 0.387721  | 2.843899  |
| H  | 3.395103  | -2.346593 | -1.402458 |

|    |           |           |           |
|----|-----------|-----------|-----------|
| H  | 0.845875  | 0.507775  | 1.794709  |
| C  | -1.897486 | -1.698884 | 0.102940  |
| Cl | -0.581879 | -2.747457 | -0.482815 |
| C  | -1.884612 | -1.305258 | 1.430167  |
| C  | -2.922130 | -0.493942 | 1.877734  |
| C  | -3.935299 | -0.105490 | 1.008834  |
| C  | -2.888900 | -1.329493 | -0.789037 |
| C  | -3.919386 | -0.522945 | -0.317985 |
| H  | -1.099127 | -1.629652 | 2.097388  |
| H  | -2.939785 | -0.179575 | 2.912428  |
| H  | -4.744239 | 0.516275  | 1.367345  |
| H  | -2.865066 | -1.664546 | -1.815765 |
| H  | -4.711072 | -0.227393 | -0.992870 |

35

(PhBr)<sub>2</sub>—miniNacNacMg<sup>+</sup>, Dispersion

|    |           |           |           |
|----|-----------|-----------|-----------|
| C  | 1.051140  | 1.847044  | -0.822276 |
| Br | 0.570783  | 0.472639  | -2.112737 |
| C  | 2.385015  | 2.185732  | -0.691094 |
| C  | 2.718761  | 3.135012  | 0.269265  |
| C  | 1.732796  | 3.710028  | 1.063147  |
| C  | 0.041931  | 2.401961  | -0.057454 |
| C  | 0.400984  | 3.346597  | 0.898684  |
| H  | 3.144342  | 1.727159  | -1.307348 |
| H  | 3.754516  | 3.421248  | 0.391687  |
| H  | 2.002757  | 4.447636  | 1.806523  |
| H  | -0.989012 | 2.114597  | -0.193984 |
| H  | -0.369394 | 3.799447  | 1.508196  |
| Mg | 0.821560  | -1.314790 | -0.173094 |
| N  | 2.189543  | -2.743369 | -0.273003 |
| N  | 1.393320  | -0.481524 | 1.531107  |
| C  | 3.082404  | -2.870509 | 0.700659  |
| C  | 2.428003  | -0.975658 | 2.197477  |
| C  | 3.205780  | -2.078153 | 1.843199  |
| H  | 4.004009  | -2.339609 | 2.521636  |
| H  | 3.808820  | -3.675564 | 0.607475  |
| H  | 2.715449  | -0.472835 | 3.119212  |
| H  | 2.324552  | -3.439657 | -0.993908 |
| H  | 1.018034  | 0.347914  | 1.970856  |
| C  | -2.386784 | -0.517558 | 0.369111  |
| Br | -1.668342 | -2.221348 | -0.217447 |
| C  | -2.179472 | -0.133165 | 1.683026  |
| C  | -2.716035 | 1.082037  | 2.097569  |
| C  | -3.439954 | 1.870317  | 1.210715  |
| C  | -3.098403 | 0.244552  | -0.541121 |
| C  | -3.630497 | 1.453077  | -0.102265 |
| H  | -1.629006 | -0.761296 | 2.368112  |
| H  | -2.575489 | 1.400147  | 3.121824  |
| H  | -3.864042 | 2.807615  | 1.544264  |
| H  | -3.244740 | -0.090269 | -1.557538 |
| H  | -4.198991 | 2.062140  | -0.791999 |

35

(Phl)2—miniNacNacMg+, Dispersion

|    |           |           |           |
|----|-----------|-----------|-----------|
| C  | -2.232113 | -0.897706 | -0.536523 |
| I  | -1.041153 | -0.055510 | -2.094930 |
| C  | -3.473744 | -0.342465 | -0.274224 |
| C  | -4.209766 | -0.858716 | 0.787349  |
| C  | -3.700825 | -1.898164 | 1.557439  |
| C  | -1.700283 | -1.938366 | 0.207235  |
| C  | -2.452739 | -2.436775 | 1.266070  |
| H  | -3.863225 | 0.471766  | -0.867683 |
| H  | -5.183219 | -0.441692 | 1.007768  |
| H  | -4.280861 | -2.293171 | 2.380416  |
| H  | -0.730228 | -2.353309 | -0.018957 |
| H  | -2.056475 | -3.251745 | 1.856961  |
| Mg | 0.000298  | 1.566523  | 0.029642  |
| N  | -0.306259 | 3.525076  | 0.067874  |
| N  | -0.883698 | 1.108447  | 1.745406  |
| C  | -0.936996 | 4.077098  | 1.096944  |
| C  | -1.432230 | 2.058518  | 2.488483  |
| C  | -1.454534 | 3.427427  | 2.218362  |
| H  | -1.940373 | 4.053562  | 2.951681  |
| H  | -1.077704 | 5.156131  | 1.073488  |
| H  | -1.926775 | 1.751350  | 3.408481  |
| H  | -0.043805 | 4.217224  | -0.621139 |
| H  | -1.035237 | 0.186258  | 2.131220  |
| C  | 2.102892  | -1.193585 | 0.502229  |
| I  | 2.738820  | 0.744223  | -0.116707 |
| C  | 1.717668  | -1.376767 | 1.822364  |
| C  | 1.333024  | -2.652082 | 2.225124  |
| C  | 1.343335  | -3.708268 | 1.321831  |
| C  | 2.114840  | -2.227501 | -0.422055 |
| C  | 1.731526  | -3.495962 | 0.003671  |
| H  | 1.725418  | -0.557130 | 2.526126  |
| H  | 1.039068  | -2.815580 | 3.253399  |
| H  | 1.055722  | -4.699338 | 1.645720  |
| H  | 2.421912  | -2.062225 | -1.444433 |
| H  | 1.745233  | -4.316914 | -0.700704 |

11

miniNacNacMg+\_nackt, Dispersion

|    |          |           |           |
|----|----------|-----------|-----------|
| Mg | 0.000000 | 0.000000  | 1.576089  |
| N  | 0.000000 | 1.536791  | 0.399662  |
| N  | 0.000000 | -1.536791 | 0.399662  |
| C  | 0.000000 | 1.257865  | -0.905705 |
| C  | 0.000000 | -1.257865 | -0.905705 |
| C  | 0.000000 | 0.000000  | -1.508670 |
| H  | 0.000000 | 0.000000  | -2.588425 |
| H  | 0.000000 | 2.107663  | -1.583815 |
| H  | 0.000000 | -2.107663 | -1.583815 |
| H  | 0.000000 | 2.530606  | 0.584103  |
| H  | 0.000000 | -2.530606 | 0.584103  |

23

miniNacNacMg+--Benzene, Dispersion

|    |           |           |           |
|----|-----------|-----------|-----------|
| C  | -2.002663 | 1.233998  | 0.707455  |
| Mg | 0.176186  | 0.135064  | -0.000016 |
| N  | 1.302376  | -1.479343 | -0.000063 |
| N  | 1.599262  | 1.497945  | 0.000002  |
| C  | 2.627134  | -1.362969 | -0.000022 |
| C  | 2.874987  | 1.123177  | -0.000027 |
| C  | 3.366457  | -0.181446 | -0.000010 |
| H  | -1.916698 | 2.164241  | 1.253083  |
| H  | 4.440764  | -0.288663 | -0.000002 |
| C  | -2.128517 | 0.023875  | 1.399466  |
| C  | -2.256049 | -1.174491 | 0.691339  |
| C  | -2.255341 | -1.167056 | -0.704221 |
| C  | -2.002058 | 1.241488  | -0.694431 |
| C  | -2.127160 | 0.038826  | -1.399441 |
| H  | -2.132675 | 0.018493  | 2.481239  |
| H  | -2.352931 | -2.108808 | 1.227461  |
| H  | -2.351674 | -2.095596 | -1.250390 |
| H  | -1.915612 | 2.177481  | -1.230059 |
| H  | -2.130384 | 0.044989  | -2.481217 |
| H  | 3.206237  | -2.283950 | -0.000046 |
| H  | 1.013463  | -2.448341 | -0.000161 |
| H  | 3.624725  | 1.911505  | -0.000009 |
| H  | 1.508343  | 2.505245  | 0.000069  |

12

Benzene, Dispersion

|   |          |           |           |
|---|----------|-----------|-----------|
| H | 0.000000 | 0.000000  | 2.473025  |
| C | 0.000000 | 0.000000  | 1.390436  |
| C | 0.000000 | 1.204158  | 0.695218  |
| C | 0.000000 | 1.204158  | -0.695218 |
| C | 0.000000 | 0.000000  | -1.390436 |
| C | 0.000000 | -1.204158 | 0.695218  |
| C | 0.000000 | -1.204158 | -0.695218 |
| H | 0.000000 | 2.141706  | 1.236519  |
| H | 0.000000 | 2.141706  | -1.236518 |
| H | 0.000000 | 0.000000  | -2.473025 |
| H | 0.000000 | -2.141706 | 1.236519  |
| H | 0.000000 | -2.141706 | -1.236518 |

12

PhF, Dispersion

|   |          |           |           |
|---|----------|-----------|-----------|
| F | 0.000000 | 0.000000  | 2.276125  |
| C | 0.000000 | 0.000000  | 0.925138  |
| C | 0.000000 | 1.212373  | 0.258992  |
| C | 0.000000 | 1.203258  | -1.131240 |
| C | 0.000000 | 0.000000  | -1.828077 |
| C | 0.000000 | -1.212373 | 0.258992  |
| C | 0.000000 | -1.203258 | -1.131240 |
| H | 0.000000 | 2.134308  | 0.823871  |
| H | 0.000000 | 2.142197  | -1.669243 |

|   |          |           |           |
|---|----------|-----------|-----------|
| H | 0.000000 | 0.000000  | -2.909774 |
| H | 0.000000 | -2.134308 | 0.823871  |
| H | 0.000000 | -2.142197 | -1.669243 |

12

PhCl, Dispersion

|    |          |           |           |
|----|----------|-----------|-----------|
| Cl | 0.000000 | 0.000000  | 2.250381  |
| C  | 0.000000 | 0.000000  | 0.504683  |
| C  | 0.000000 | 1.209727  | -0.176324 |
| C  | 0.000000 | 1.202052  | -1.565790 |
| C  | 0.000000 | 0.000000  | -2.263509 |
| C  | 0.000000 | -1.209727 | -0.176324 |
| C  | 0.000000 | -1.202052 | -1.565790 |
| H  | 0.000000 | 2.139096  | 0.375356  |
| H  | 0.000000 | 2.142278  | -2.101751 |
| H  | 0.000000 | 0.000000  | -3.345352 |
| H  | 0.000000 | -2.139096 | 0.375356  |
| H  | 0.000000 | -2.142278 | -2.101751 |

12

PhBr, Dispersion

|    |          |           |           |
|----|----------|-----------|-----------|
| Br | 0.000000 | 0.000000  | 1.805198  |
| C  | 0.000000 | 0.000000  | -0.104504 |
| C  | 0.000000 | 1.210317  | -0.783526 |
| C  | 0.000000 | 1.202140  | -2.173605 |
| C  | 0.000000 | 0.000000  | -2.870918 |
| C  | 0.000000 | -1.210317 | -0.783526 |
| C  | 0.000000 | -1.202140 | -2.173605 |
| H  | 0.000000 | 2.141960  | -0.236035 |
| H  | 0.000000 | 2.142482  | -2.709477 |
| H  | 0.000000 | 0.000000  | -3.952796 |
| H  | 0.000000 | -2.141960 | -0.236035 |
| H  | 0.000000 | -2.142482 | -2.709477 |

12

PhI, Dispersion

|   |           |           |           |
|---|-----------|-----------|-----------|
| I | 1.549383  | 0.000000  | -0.000007 |
| C | -0.561437 | 0.000021  | 0.000019  |
| C | -1.245595 | -1.209496 | 0.000033  |
| C | -2.635979 | -1.201835 | 0.000000  |
| C | -3.333662 | -0.000015 | -0.000043 |
| C | -1.245620 | 1.209510  | 0.000033  |
| C | -2.636011 | 1.201816  | 0.000000  |
| H | -0.704556 | -2.145103 | 0.000090  |
| H | -3.171323 | -2.142602 | 0.000004  |
| H | -4.415592 | -0.000027 | -0.000092 |
| H | -0.704608 | 2.145135  | 0.000090  |
| H | -3.171372 | 2.142573  | 0.000004  |

103

tBuBDIMg<sup>+</sup>--Benzene, Dispersion

|    |          |           |          |
|----|----------|-----------|----------|
| Mg | 0.003002 | -0.672579 | 0.180759 |
|----|----------|-----------|----------|

|   |           |           |           |
|---|-----------|-----------|-----------|
| N | 1.507980  | 0.582423  | -0.111186 |
| N | -1.487255 | 0.596849  | -0.110556 |
| C | -1.277454 | 1.852498  | -0.508768 |
| C | 1.314592  | 1.860515  | -0.435861 |
| C | 2.719440  | -0.108288 | 0.198768  |
| C | -2.717555 | -0.115317 | 0.034579  |
| C | 0.021265  | 2.384818  | -0.622624 |
| H | 0.026478  | 3.412102  | -0.924453 |
| C | 3.173448  | -0.112337 | 1.534314  |
| C | 3.307196  | -0.938377 | -0.772539 |
| C | -3.174615 | -0.883002 | -1.055765 |
| C | -3.329654 | -0.211740 | 1.296438  |
| C | 2.454018  | 2.884880  | -0.716345 |
| C | 2.900078  | -0.872052 | -2.236165 |
| H | 2.102279  | -0.133396 | -2.323139 |
| C | -2.401992 | 2.872514  | -0.857746 |
| C | 2.586630  | 0.852020  | 2.556221  |
| H | 2.299946  | 1.755133  | 2.017308  |
| C | 4.323337  | -1.806330 | -0.374037 |
| H | 4.793237  | -2.447281 | -1.108777 |
| C | -2.515210 | -0.739359 | -2.418783 |
| H | -2.102492 | 0.267562  | -2.474225 |
| C | 4.188259  | -0.998537 | 1.882260  |
| H | 4.557545  | -1.018063 | 2.897763  |
| C | -3.834842 | 2.323264  | -0.912022 |
| H | -3.961232 | 1.563507  | -1.679493 |
| H | -4.497330 | 3.151829  | -1.165096 |
| H | -4.176172 | 1.912679  | 0.031449  |
| C | 4.752000  | -1.852901 | 0.942019  |
| H | 5.540081  | -2.534046 | 1.234192  |
| C | 3.882796  | 2.433545  | -0.380351 |
| H | 4.025113  | 2.246010  | 0.680739  |
| H | 4.559169  | 3.242689  | -0.658322 |
| H | 4.194005  | 1.550299  | -0.926405 |
| C | 2.418787  | 3.202900  | -2.227351 |
| H | 2.594477  | 2.303887  | -2.819582 |
| H | 3.204646  | 3.920970  | -2.466635 |
| H | 1.465721  | 3.627900  | -2.536079 |
| C | -4.399089 | -1.094806 | 1.445452  |
| H | -4.891155 | -1.174680 | 2.405972  |
| C | -4.239295 | -1.755055 | -0.856350 |
| H | -4.612451 | -2.344383 | -1.682464 |
| C | 4.064931  | -0.401988 | -3.118933 |
| H | 4.460916  | 0.557821  | -2.790215 |
| H | 3.735318  | -0.294367 | -4.153649 |
| H | 4.884610  | -1.121965 | -3.103921 |
| C | 2.210009  | 4.177607  | 0.090832  |
| H | 1.298060  | 4.696898  | -0.193906 |
| H | 3.041602  | 4.863470  | -0.074749 |
| H | 2.157789  | 3.968599  | 1.160639  |
| C | -4.847552 | -1.868584 | 0.387081  |
| H | -5.679038 | -2.546988 | 0.524275  |

|   |           |           |           |
|---|-----------|-----------|-----------|
| C | -2.128837 | 3.481292  | -2.250822 |
| H | -1.208128 | 4.057805  | -2.295375 |
| H | -2.947976 | 4.151573  | -2.513753 |
| H | -2.076032 | 2.703071  | -3.014238 |
| C | 2.358879  | -2.208090 | -2.756337 |
| H | 3.119531  | -2.989111 | -2.705344 |
| H | 2.051391  | -2.114158 | -3.798986 |
| H | 1.498362  | -2.551194 | -2.183356 |
| C | -2.872342 | 0.622846  | 2.480718  |
| H | -2.026585 | 1.228022  | 2.152485  |
| C | -0.069756 | -2.621605 | 1.525545  |
| H | -0.073634 | -1.968902 | 2.391874  |
| C | -1.346571 | -1.713503 | -2.594133 |
| H | -0.576695 | -1.603758 | -1.817868 |
| H | -0.834571 | -1.551020 | -3.542834 |
| H | -1.681770 | -2.749080 | -2.551169 |
| C | -2.372347 | 3.987018  | 0.209550  |
| H | -2.559691 | 3.581435  | 1.204252  |
| H | -3.151820 | 4.719257  | -0.006769 |
| H | -1.416974 | 4.507618  | 0.234335  |
| C | -1.284330 | -3.111543 | 1.019562  |
| H | -2.224517 | -2.752170 | 1.414456  |
| C | 1.309082  | 0.312873  | 3.210486  |
| H | 0.490651  | 0.232693  | 2.490569  |
| H | 0.957736  | 0.991376  | 3.988907  |
| H | 1.478121  | -0.664335 | 3.666826  |
| C | 1.155166  | -3.093639 | 1.024601  |
| H | 2.089345  | -2.727619 | 1.429615  |
| C | 3.590155  | 1.270437  | 3.633278  |
| H | 3.823880  | 0.451262  | 4.315131  |
| H | 3.173526  | 2.081018  | 4.232186  |
| H | 4.524733  | 1.619546  | 3.193351  |
| C | -1.265423 | -4.072294 | 0.017208  |
| H | -2.198343 | -4.454592 | -0.372957 |
| C | -0.051951 | -4.545050 | -0.473642 |
| H | -0.044408 | -5.299793 | -1.248981 |
| C | 1.152954  | -4.053696 | 0.019327  |
| H | 2.091856  | -4.422114 | -0.368632 |
| C | -3.492157 | -0.892313 | -3.587094 |
| H | -3.864907 | -1.913456 | -3.678887 |
| H | -2.995184 | -0.642072 | -4.525257 |
| H | -4.350624 | -0.230502 | -3.471244 |
| C | -3.973592 | 1.578841  | 2.959716  |
| H | -4.321834 | 2.229402  | 2.158858  |
| H | -3.601669 | 2.209395  | 3.768939  |
| H | -4.835656 | 1.027063  | 3.337725  |
| C | -2.400092 | -0.251589 | 3.648949  |
| H | -3.216190 | -0.857947 | 4.044439  |
| H | -2.022442 | 0.368489  | 4.463063  |
| H | -1.601891 | -0.932566 | 3.353097  |



## tBuBDIMg+\_nackt, Dispersion

|    |           |           |           |
|----|-----------|-----------|-----------|
| Mg | -0.033119 | -1.096179 | 0.522602  |
| N  | -1.525640 | 0.156018  | 0.369247  |
| N  | 1.442893  | 0.026788  | -0.138154 |
| C  | 1.176159  | 1.228914  | -0.658888 |
| C  | -1.323018 | 1.429688  | 0.008350  |
| C  | -2.738549 | -0.583419 | 0.453961  |
| C  | 2.706040  | -0.630254 | -0.027377 |
| C  | -0.072235 | 1.860679  | -0.464341 |
| H  | -0.077426 | 2.880854  | -0.795919 |
| C  | -3.503602 | -0.823020 | -0.709950 |
| C  | -3.037322 | -1.259000 | 1.655036  |
| C  | 3.665700  | -0.192291 | 0.901126  |
| C  | 2.887496  | -1.836744 | -0.734348 |
| C  | -2.380519 | 2.563892  | 0.161937  |
| C  | -2.215365 | -1.140662 | 2.933779  |
| H  | -2.697099 | -1.819367 | 3.639092  |
| C  | 2.139566  | 2.024603  | -1.589421 |
| C  | -3.096805 | -0.223914 | -2.046499 |
| H  | -2.688368 | 0.765590  | -1.860951 |
| C  | -4.153735 | -2.095019 | 1.692293  |
| H  | -4.403012 | -2.596529 | 2.619145  |
| C  | 3.421633  | 1.020051  | 1.780932  |
| H  | 2.647118  | 1.625871  | 1.315535  |
| C  | -4.606910 | -1.664780 | -0.617459 |
| H  | -5.214416 | -1.842175 | -1.493038 |
| C  | 3.467695  | 1.337867  | -1.937517 |
| H  | 4.142592  | 1.253483  | -1.092177 |
| H  | 3.966948  | 1.943841  | -2.694337 |
| H  | 3.324406  | 0.344511  | -2.358861 |
| C  | -4.945592 | -2.288906 | 0.574408  |
| H  | -5.812159 | -2.933950 | 0.624847  |
| C  | -3.773895 | 2.110482  | 0.617093  |
| H  | -4.299629 | 1.537623  | -0.141920 |
| H  | -4.368353 | 3.001364  | 0.822511  |
| H  | -3.745454 | 1.520399  | 1.529040  |
| C  | -1.834453 | 3.518996  | 1.250760  |
| H  | -1.712807 | 3.005169  | 2.204484  |
| H  | -2.541621 | 4.336115  | 1.399729  |
| H  | -0.873018 | 3.946982  | 0.973812  |
| C  | 4.070252  | -2.547494 | -0.569136 |
| H  | 4.236242  | -3.459096 | -1.125458 |
| C  | 4.833575  | -0.940367 | 1.041014  |
| H  | 5.591129  | -0.612537 | 1.739397  |
| C  | -0.764277 | -1.656000 | 2.812715  |
| H  | -0.689636 | -2.510544 | 2.118889  |
| H  | -0.391811 | -2.044977 | 3.760231  |
| H  | -0.059718 | -0.839943 | 2.584286  |
| C  | -2.558683 | 3.368837  | -1.140709 |
| H  | -1.644825 | 3.865526  | -1.460406 |
| H  | -3.307941 | 4.143953  | -0.975406 |
| H  | -2.909043 | 2.744422  | -1.962034 |

|   |           |           |           |
|---|-----------|-----------|-----------|
| C | 5.048699  | -2.094390 | 0.304767  |
| H | 5.969516  | -2.649472 | 0.422117  |
| C | 2.468024  | 3.404338  | -0.987486 |
| H | 1.581254  | 4.013283  | -0.821788 |
| H | 3.116843  | 3.948153  | -1.675416 |
| H | 2.995611  | 3.310272  | -0.039166 |
| C | -2.221399 | 0.250614  | 3.571907  |
| H | -1.714939 | 0.974809  | 2.936904  |
| H | -1.713648 | 0.230801  | 4.538171  |
| H | -3.241864 | 0.593394  | 3.737244  |
| C | 1.752628  | -2.356700 | -1.600041 |
| H | 1.263475  | -1.488437 | -2.043743 |
| C | 2.879123  | 0.573385  | 3.146092  |
| H | 1.963539  | -0.012103 | 3.035314  |
| H | 2.651354  | 1.435692  | 3.774764  |
| H | 3.606824  | -0.048943 | 3.669744  |
| C | 1.394203  | 2.217612  | -2.932944 |
| H | 1.130379  | 1.252918  | -3.370909 |
| H | 2.047632  | 2.737533  | -3.634480 |
| H | 0.481179  | 2.798291  | -2.827105 |
| C | -1.969340 | -1.042784 | -2.691500 |
| H | -1.062498 | -1.007960 | -2.084464 |
| H | -1.710040 | -0.636848 | -3.670360 |
| H | -2.266663 | -2.085064 | -2.822479 |
| C | -4.256926 | -0.046913 | -3.026377 |
| H | -4.638279 | -1.002907 | -3.388365 |
| H | -3.920793 | 0.516634  | -3.897511 |
| H | -5.085402 | 0.497278  | -2.571402 |
| C | 4.656218  | 1.908411  | 1.953182  |
| H | 5.439275  | 1.410873  | 2.526450  |
| H | 4.389446  | 2.818423  | 2.492459  |
| H | 5.079082  | 2.197377  | 0.990453  |
| C | 2.176633  | -3.266966 | -2.750441 |
| H | 2.899824  | -2.764743 | -3.392298 |
| H | 1.311093  | -3.532632 | -3.359285 |
| H | 2.625011  | -4.194453 | -2.392451 |
| C | 0.703304  | -3.084194 | -0.706435 |
| H | 0.762816  | -4.167595 | -0.810683 |
| H | -0.338656 | -2.838912 | -0.963099 |
| H | 0.917244  | -2.955063 | 0.371116  |

103

tBuBDIMg+--PhI, Dispersion

|    |           |           |           |
|----|-----------|-----------|-----------|
| I  | 0.273494  | -2.637216 | 1.144085  |
| Mg | -0.084924 | -0.121411 | 0.070138  |
| N  | 0.797577  | 1.628504  | -0.068882 |
| N  | -1.937355 | 0.412446  | -0.306912 |
| C  | 2.201634  | 1.482723  | 0.157569  |
| C  | 3.031089  | 1.138031  | -0.929277 |
| C  | 4.394421  | -2.526272 | -0.284512 |
| H  | 5.290788  | -1.981185 | -0.025853 |
| C  | -3.239004 | -0.947838 | 1.246819  |

|   |           |           |           |
|---|-----------|-----------|-----------|
| C | 2.704954  | 1.511919  | 1.469326  |
| C | -3.130857 | 0.140346  | 2.303604  |
| H | -3.139011 | 1.099426  | 1.786181  |
| C | 4.061886  | 1.250440  | 1.663867  |
| H | 4.471497  | 1.291005  | 2.664659  |
| C | -2.758477 | -0.729086 | -0.061020 |
| C | 4.378314  | 0.899492  | -0.687932 |
| H | 5.035611  | 0.661511  | -1.512137 |
| C | 2.067642  | -3.917029 | -0.950896 |
| H | 1.164558  | -4.452030 | -1.205995 |
| C | -1.275915 | 2.679695  | -0.667495 |
| H | -1.677739 | 3.632241  | -0.947495 |
| C | 3.246835  | -4.144493 | -1.652301 |
| H | 3.252903  | -4.866952 | -2.457404 |
| C | 0.113804  | 2.717058  | -0.434005 |
| C | 3.226832  | -2.278820 | 0.430680  |
| H | 3.220339  | -1.544755 | 1.223406  |
| C | -2.863414 | -1.724973 | -1.047119 |
| C | 4.406220  | -3.453551 | -1.318565 |
| H | 5.320304  | -3.639553 | -1.865954 |
| C | 1.823997  | 1.837223  | 2.662503  |
| H | 0.818201  | 2.031583  | 2.288025  |
| C | -2.257134 | 1.668848  | -0.605090 |
| C | 2.259478  | 4.248476  | -0.482618 |
| H | 2.637931  | 3.933575  | 0.484254  |
| H | 2.524070  | 5.299013  | -0.609123 |
| H | 2.783671  | 3.688253  | -1.252650 |
| C | 2.091195  | -2.988661 | 0.078640  |
| C | -3.689383 | 2.144465  | -0.977864 |
| C | 2.444458  | 1.009153  | -2.324273 |
| H | 1.607043  | 1.702973  | -2.397317 |
| C | -3.456091 | -2.939166 | -0.704745 |
| H | -3.555638 | -3.712268 | -1.455529 |
| C | 4.897684  | 0.963261  | 0.598315  |
| H | 5.951927  | 0.787036  | 0.767629  |
| C | 0.732634  | 4.137225  | -0.605257 |
| C | -2.346903 | -1.508310 | -2.459009 |
| H | -1.935839 | -0.499058 | -2.509901 |
| C | -3.811564 | -2.181490 | 1.542994  |
| H | -4.193262 | -2.368335 | 2.536989  |
| C | -3.918837 | -3.175130 | 0.578591  |
| H | -4.372399 | -4.125074 | 0.827874  |
| C | 1.747624  | 0.651567  | 3.633129  |
| H | 1.399657  | -0.256821 | 3.137471  |
| H | 1.062966  | 0.868536  | 4.454222  |
| H | 2.725843  | 0.433626  | 4.064555  |
| C | -1.802893 | 0.058842  | 3.065015  |
| H | -1.681177 | -0.912702 | 3.547531  |
| H | -1.745403 | 0.829705  | 3.834724  |
| H | -0.943529 | 0.220645  | 2.408567  |
| C | -4.303846 | 0.147867  | 3.286633  |
| H | -5.260290 | 0.160817  | 2.763183  |

|   |           |           |           |
|---|-----------|-----------|-----------|
| H | -4.251808 | 1.034017  | 3.920419  |
| H | -4.292263 | -0.722178 | 3.944746  |
| C | 2.291542  | 3.100522  | 3.395972  |
| H | 3.283478  | 2.962686  | 3.828891  |
| H | 1.605118  | 3.342547  | 4.208986  |
| H | 2.337702  | 3.958909  | 2.726423  |
| C | 0.376469  | 4.688472  | -2.002992 |
| H | 0.750382  | 4.029894  | -2.788944 |
| H | 0.847761  | 5.663465  | -2.132765 |
| H | -0.692323 | 4.818734  | -2.154542 |
| C | 3.423773  | 1.359011  | -3.445817 |
| H | 3.865455  | 2.343696  | -3.290683 |
| H | 2.905043  | 1.368202  | -4.405238 |
| H | 4.234946  | 0.633466  | -3.522353 |
| C | -4.810991 | 1.113966  | -0.789938 |
| H | -4.667961 | 0.216841  | -1.383599 |
| H | -5.744841 | 1.574477  | -1.114632 |
| H | -4.939785 | 0.818370  | 0.248345  |
| C | -4.076497 | 3.375262  | -0.132569 |
| H | -4.038677 | 3.146524  | 0.933795  |
| H | -5.098876 | 3.667913  | -0.374741 |
| H | -3.438523 | 4.237178  | -0.313838 |
| C | -3.666080 | 2.526149  | -2.474158 |
| H | -2.956564 | 3.324097  | -2.684730 |
| H | -4.657853 | 2.863267  | -2.779533 |
| H | -3.399311 | 1.665791  | -3.090264 |
| C | 1.888694  | -0.403594 | -2.542519 |
| H | 2.674295  | -1.155220 | -2.468520 |
| H | 1.401727  | -0.496045 | -3.513559 |
| H | 1.132208  | -0.679567 | -1.795169 |
| C | 0.122411  | 5.044128  | 0.485282  |
| H | -0.959820 | 5.120310  | 0.402953  |
| H | 0.540674  | 6.048202  | 0.399568  |
| H | 0.357373  | 4.666089  | 1.481268  |
| C | -1.220891 | -2.492142 | -2.802996 |
| H | -0.396530 | -2.434277 | -2.089659 |
| H | -0.817994 | -2.286759 | -3.795913 |
| H | -1.582962 | -3.521466 | -2.794807 |
| C | -3.470855 | -1.597476 | -3.498807 |
| H | -3.912815 | -2.594777 | -3.519058 |
| H | -3.083636 | -1.384191 | -4.496565 |
| H | -4.268007 | -0.885319 | -3.286765 |

103

tBuBDIMg+--PhBr, Dispersion

|    |           |           |           |
|----|-----------|-----------|-----------|
| Br | 0.203715  | -2.538405 | 1.290532  |
| Mg | -0.074018 | -0.264052 | 0.141439  |
| N  | 0.909117  | 1.418522  | -0.104929 |
| N  | -1.894657 | 0.348209  | -0.256600 |
| C  | 2.305568  | 1.210596  | 0.118832  |
| C  | 3.106042  | 0.767186  | -0.953861 |
| C  | 4.141414  | -2.916876 | -0.042204 |

|   |           |           |           |
|---|-----------|-----------|-----------|
| H | 5.087322  | -2.433542 | 0.154813  |
| C | -3.281749 | -0.833453 | 1.370245  |
| C | 2.821796  | 1.282548  | 1.423881  |
| C | -3.079702 | 0.295271  | 2.368928  |
| H | -3.039369 | 1.227778  | 1.805937  |
| C | 4.164700  | 0.959832  | 1.623835  |
| H | 4.584883  | 1.031220  | 2.618485  |
| C | -2.785228 | -0.724548 | 0.055266  |
| C | 4.440668  | 0.468775  | -0.708144 |
| H | 5.077588  | 0.154193  | -1.522622 |
| C | 1.687130  | -4.150625 | -0.550409 |
| H | 0.732695  | -4.620469 | -0.735824 |
| C | -1.107875 | 2.549667  | -0.751138 |
| H | -1.457470 | 3.506099  | -1.083080 |
| C | 2.834126  | -4.567631 | -1.216696 |
| H | 2.766192  | -5.376596 | -1.931342 |
| C | 0.282859  | 2.522181  | -0.526655 |
| C | 3.008825  | -2.478084 | 0.636713  |
| H | 3.072651  | -1.662313 | 1.341983  |
| C | -2.960335 | -1.763013 | -0.874539 |
| C | 4.055855  | -3.954159 | -0.961998 |
| H | 4.943628  | -4.287863 | -1.481727 |
| C | 1.969097  | 1.713891  | 2.603858  |
| H | 0.972914  | 1.945552  | 2.225151  |
| C | -2.144743 | 1.601279  | -0.626859 |
| C | 2.509062  | 3.929959  | -0.666762 |
| H | 2.875753  | 3.647417  | 0.314556  |
| H | 2.828497  | 4.956540  | -0.850217 |
| H | 2.998178  | 3.302390  | -1.407302 |
| C | 1.815258  | -3.115704 | 0.358688  |
| C | -3.549460 | 2.137841  | -1.021872 |
| C | 2.503003  | 0.604709  | -2.338561 |
| H | 1.715374  | 1.350473  | -2.446289 |
| C | -3.645087 | -2.907817 | -0.470206 |
| H | -3.800579 | -3.712169 | -1.177453 |
| C | 4.974146  | 0.571365  | 0.569914  |
| H | 6.018919  | 0.347619  | 0.741693  |
| C | 0.977699  | 3.894808  | -0.778236 |
| C | -2.424634 | -1.662767 | -2.292134 |
| H | -1.961244 | -0.681289 | -2.402460 |
| C | -3.953399 | -1.998286 | 1.727950  |
| H | -4.351957 | -2.100165 | 2.727472  |
| C | -4.134275 | -3.032359 | 0.818928  |
| H | -4.663064 | -3.928054 | 1.116216  |
| C | 1.834262  | 0.582243  | 3.631110  |
| H | 1.429509  | -0.327594 | 3.183415  |
| H | 1.170931  | 0.877293  | 4.445248  |
| H | 2.802364  | 0.329201  | 4.066185  |
| C | -1.740429 | 0.160516  | 3.103397  |
| H | -1.665892 | -0.797971 | 3.619712  |
| H | -1.615732 | 0.955509  | 3.839879  |
| H | -0.889041 | 0.246285  | 2.421814  |

|   |           |           |           |
|---|-----------|-----------|-----------|
| C | -4.222407 | 0.426904  | 3.378045  |
| H | -5.189796 | 0.478384  | 2.877578  |
| H | -4.095761 | 1.336834  | 3.965931  |
| H | -4.249251 | -0.409736 | 4.077702  |
| C | 2.510741  | 2.983430  | 3.272702  |
| H | 3.496309  | 2.812373  | 3.708280  |
| H | 1.843976  | 3.302559  | 4.075354  |
| H | 2.599674  | 3.804127  | 2.561421  |
| C | 0.642855  | 4.387652  | -2.202793 |
| H | 0.974607  | 3.667494  | -2.952827 |
| H | 1.165981  | 5.326603  | -2.387873 |
| H | -0.418181 | 4.568111  | -2.357187 |
| C | 3.497302  | 0.826213  | -3.479458 |
| H | 4.008967  | 1.783481  | -3.376682 |
| H | 2.973879  | 0.823467  | -4.436312 |
| H | 4.254190  | 0.041543  | -3.521310 |
| C | -4.729708 | 1.187288  | -0.778447 |
| H | -4.642673 | 0.252675  | -1.323265 |
| H | -5.635234 | 1.685177  | -1.127296 |
| H | -4.872409 | 0.955767  | 0.274119  |
| C | -3.859870 | 3.432378  | -0.242405 |
| H | -3.830827 | 3.258364  | 0.834497  |
| H | -4.864418 | 3.771354  | -0.498303 |
| H | -3.173282 | 4.244599  | -0.469771 |
| C | -3.511443 | 2.437632  | -2.536523 |
| H | -2.759758 | 3.182291  | -2.791108 |
| H | -4.484330 | 2.812916  | -2.857599 |
| H | -3.296179 | 1.532052  | -3.106231 |
| C | 1.848212  | -0.774740 | -2.482004 |
| H | 2.576129  | -1.575935 | -2.355945 |
| H | 1.363841  | -0.887490 | -3.452206 |
| H | 1.064807  | -0.948075 | -1.732129 |
| C | 0.425198  | 4.892262  | 0.263047  |
| H | -0.651878 | 5.022403  | 0.181390  |
| H | 0.896380  | 5.865876  | 0.119857  |
| H | 0.646917  | 4.557682  | 1.277487  |
| C | -1.347879 | -2.722802 | -2.556936 |
| H | -0.529065 | -2.659463 | -1.837376 |
| H | -0.923720 | -2.605380 | -3.555310 |
| H | -1.762802 | -3.729476 | -2.484571 |
| C | -3.542224 | -1.759806 | -3.337609 |
| H | -4.034339 | -2.732867 | -3.303258 |
| H | -3.136199 | -1.627301 | -4.341882 |
| H | -4.303857 | -0.996802 | -3.177958 |

103

tBuBDIMg+--PhCl, Dispersion

|    |           |           |           |
|----|-----------|-----------|-----------|
| Cl | -0.197957 | 2.451096  | 1.484172  |
| Mg | 0.067835  | 0.379535  | 0.258683  |
| N  | -0.985170 | -1.234580 | -0.121121 |
| N  | 1.862005  | -0.269655 | -0.189934 |
| C  | 2.797715  | 0.744128  | 0.183745  |

|   |           |           |           |
|---|-----------|-----------|-----------|
| C | -0.400419 | -2.330674 | -0.616642 |
| C | 0.989576  | -2.399503 | -0.834309 |
| C | -2.374864 | -0.984433 | 0.100855  |
| C | -3.142074 | -0.436986 | -0.947747 |
| C | -2.910520 | -1.122421 | 1.392712  |
| C | 3.295743  | 0.754561  | 1.502316  |
| C | 2.063187  | -1.504397 | -0.642942 |
| C | -4.464980 | -0.095139 | -0.694552 |
| H | -5.077535 | 0.301210  | -1.491844 |
| C | -1.147816 | -3.653888 | -0.964779 |
| C | -2.516632 | -0.213532 | -2.314021 |
| H | -1.764465 | -0.988081 | -2.464077 |
| C | 3.028736  | 1.820876  | -0.688053 |
| C | -2.857884 | 2.626622  | 0.860039  |
| H | -2.997796 | 1.744796  | 1.468245  |
| C | -5.017963 | -0.257800 | 0.568931  |
| H | -6.053397 | 0.002252  | 0.745857  |
| C | -1.382343 | 4.312049  | -0.107456 |
| H | -0.388505 | 4.719721  | -0.217976 |
| C | -2.091792 | -1.669902 | 2.548417  |
| H | -1.104903 | -1.927190 | 2.161964  |
| C | -2.680574 | -3.633729 | -0.868921 |
| H | -3.046655 | -3.403496 | 0.126193  |
| H | -3.038840 | -4.631776 | -1.124062 |
| H | -3.136023 | -2.938459 | -1.569363 |
| C | -4.240180 | -0.753791 | 1.601548  |
| H | -4.675642 | -0.872810 | 2.584982  |
| C | 3.025431  | -0.412340 | 2.439114  |
| H | 2.953904  | -1.313408 | 1.829457  |
| C | -1.612457 | 3.193107  | 0.672288  |
| C | -3.936377 | 3.228429  | 0.220290  |
| H | -4.921603 | 2.803796  | 0.347377  |
| C | 3.447331  | -2.072264 | -1.066820 |
| C | -2.476700 | 4.892322  | -0.737655 |
| H | -2.329870 | 5.769600  | -1.352700 |
| C | -3.748154 | 4.352813  | -0.573412 |
| H | -4.594589 | 4.813024  | -1.064635 |
| C | 3.774421  | 2.902982  | -0.222907 |
| H | 3.974292  | 3.735158  | -0.885395 |
| C | 2.492199  | 1.826257  | -2.108755 |
| H | 1.986634  | 0.874182  | -2.276004 |
| C | 4.032245  | 1.857949  | 1.920963  |
| H | 4.435083  | 1.883240  | 2.923525  |
| C | 4.271059  | 2.928190  | 1.069076  |
| H | 4.849486  | 3.775114  | 1.413203  |
| C | -1.910575 | -0.612989 | 3.645911  |
| H | -1.455488 | 0.301609  | 3.260229  |
| H | -1.271851 | -0.991772 | 4.444911  |
| H | -2.869333 | -0.338307 | 4.088479  |
| C | 1.680122  | -0.251744 | 3.157970  |
| H | 1.633261  | 0.689426  | 3.707796  |
| H | 1.510823  | -1.068257 | 3.861195  |

|   |           |           |           |
|---|-----------|-----------|-----------|
| H | 0.836145  | -0.281403 | 2.461404  |
| C | 4.140582  | -0.646151 | 3.460318  |
| H | 5.114410  | -0.716131 | 2.974870  |
| H | 3.962104  | -1.577913 | 3.998401  |
| H | 4.190425  | 0.152208  | 4.202199  |
| C | 4.666641  | -1.195005 | -0.750371 |
| H | 4.628578  | -0.222880 | -1.231211 |
| H | 5.552220  | -1.709699 | -1.125074 |
| H | 4.808204  | -1.042002 | 0.316645  |
| C | 1.462186  | 2.945014  | -2.307813 |
| H | 0.638572  | 2.869746  | -1.594835 |
| H | 1.036589  | 2.908999  | -3.311838 |
| H | 1.918543  | 3.926813  | -2.171270 |
| C | 3.694577  | -3.430162 | -0.377262 |
| H | 3.657121  | -3.330919 | 0.708845  |
| H | 4.688317  | -3.790894 | -0.645152 |
| H | 2.979898  | -4.196142 | -0.669265 |
| C | -2.702328 | -2.950099 | 3.131829  |
| H | -3.682185 | -2.757866 | 3.571375  |
| H | -2.059829 | -3.352426 | 3.916668  |
| H | -2.825084 | -3.718643 | 2.369110  |
| C | -3.508050 | -0.312201 | -3.474478 |
| H | -4.066754 | -1.247767 | -3.438015 |
| H | -2.974579 | -0.273665 | -4.424971 |
| H | -4.225404 | 0.509838  | -3.471459 |
| C | -0.817083 | -4.067288 | -2.415251 |
| H | -1.110142 | -3.287010 | -3.119871 |
| H | -1.376271 | -4.969594 | -2.665567 |
| H | 0.237239  | -4.281907 | -2.571869 |
| C | -0.647973 | -4.738201 | 0.014633  |
| H | 0.423855  | -4.906842 | -0.065848 |
| H | -1.156448 | -5.680421 | -0.195378 |
| H | -0.867685 | -4.460687 | 1.046629  |
| C | 3.409774  | -2.264566 | -2.598774 |
| H | 2.626281  | -2.953272 | -2.908975 |
| H | 4.366997  | -2.662612 | -2.938986 |
| H | 3.242899  | -1.312687 | -3.105674 |
| C | -1.793768 | 1.138120  | -2.362634 |
| H | -2.481500 | 1.964723  | -2.185036 |
| H | -1.299315 | 1.290805  | -3.322199 |
| H | -1.005881 | 1.219255  | -1.602332 |
| C | 3.613889  | 1.936630  | -3.148410 |
| H | 4.145175  | 2.885429  | -3.060596 |
| H | 3.203755  | 1.877261  | -4.157988 |
| H | 4.343779  | 1.135580  | -3.032849 |
| H | 1.302954  | -3.345313 | -1.226952 |

103

tBuBDIMg<sup>+</sup>--PhF, Dispersion

|   |           |           |           |
|---|-----------|-----------|-----------|
| N | 1.662096  | -0.631703 | 0.004818  |
| N | -1.310396 | -1.016315 | 0.066548  |
| C | 1.623334  | -1.874684 | -0.464043 |



|   |           |           |           |
|---|-----------|-----------|-----------|
| C | 0.394916  | -2.552220 | -0.638183 |
| H | 0.518063  | -3.551109 | -1.005033 |
| C | -0.955424 | -2.193695 | -0.460632 |
| C | 2.754122  | 0.247523  | 0.268728  |
| C | 3.221693  | 0.321738  | 1.599726  |
| C | 2.872832  | -2.702781 | -0.871271 |
| C | 3.184514  | 1.167180  | -0.703160 |
| C | -2.592361 | -0.388596 | 0.084996  |
| C | 4.100109  | 2.147903  | -0.321132 |
| H | 4.455835  | 2.854562  | -1.059524 |
| C | 4.228761  | -2.074665 | -0.520906 |
| H | 4.404483  | -1.126526 | -1.015807 |
| H | 5.010918  | -2.761862 | -0.845393 |
| H | 4.353150  | -1.926422 | 0.550105  |
| C | 4.568703  | 2.232319  | 0.978394  |
| H | 5.280443  | 2.999665  | 1.252070  |
| C | 2.700035  | 1.115867  | -2.141627 |
| H | 1.973954  | 0.306023  | -2.219224 |
| C | 1.281198  | -0.449189 | 3.078920  |
| H | 1.023699  | 0.615627  | 3.066702  |
| H | 1.111643  | -0.776166 | 4.104727  |
| H | 0.568749  | -1.055564 | 2.501332  |
| C | -3.246323 | -0.210815 | 1.317277  |
| C | -1.959690 | -3.331420 | -0.814011 |
| C | 4.130912  | 1.320755  | 1.930434  |
| H | 4.515286  | 1.389639  | 2.937343  |
| C | -2.733002 | -0.857692 | 2.592556  |
| H | -1.859867 | -1.457357 | 2.327370  |
| C | 2.745210  | -0.692506 | 2.635090  |
| H | 2.766103  | -1.673098 | 2.155947  |
| C | -2.350615 | 0.059879  | -2.408368 |
| H | -1.880232 | -0.922692 | -2.413950 |
| C | -3.092254 | 0.209418  | -1.091336 |
| C | 2.824658  | -2.916595 | -2.398053 |
| H | 1.929224  | -3.453744 | -2.705807 |
| H | 3.693860  | -3.495936 | -2.713550 |
| H | 2.844672  | -1.964589 | -2.928701 |
| C | 2.838242  | -4.072093 | -0.157456 |
| H | 2.790897  | -3.948899 | 0.926163  |
| H | 3.752638  | -4.618297 | -0.391547 |
| H | 2.000166  | -4.694488 | -0.461864 |
| C | -2.300311 | 0.192085  | 3.624901  |
| H | -1.568052 | 0.896173  | 3.221006  |
| H | -1.861478 | -0.284146 | 4.503078  |
| H | -3.152304 | 0.785632  | 3.959164  |
| C | 3.846916  | 0.818811  | -3.118022 |
| H | 4.584805  | 1.622612  | -3.111569 |
| H | 3.462528  | 0.729586  | -4.135465 |
| H | 4.364601  | -0.107007 | -2.872020 |
| C | 1.997177  | 2.417078  | -2.547222 |
| H | 1.156734  | 2.645781  | -1.894037 |
| H | 1.618625  | 2.343544  | -3.567596 |

|    |           |           |           |
|----|-----------|-----------|-----------|
| H  | 2.685477  | 3.263171  | -2.510972 |
| C  | 3.644910  | -0.774943 | 3.868859  |
| H  | 4.685537  | -0.937790 | 3.589473  |
| H  | 3.331078  | -1.607423 | 4.499433  |
| H  | 3.593110  | 0.132296  | 4.473365  |
| C  | -3.255792 | 0.129868  | -3.638589 |
| H  | -4.090830 | -0.567592 | -3.561758 |
| H  | -2.684648 | -0.123774 | -4.532451 |
| H  | -3.664080 | 1.130416  | -3.789932 |
| C  | -4.409627 | 0.558782  | 1.353205  |
| H  | -4.930453 | 0.692925  | 2.292224  |
| C  | -1.222589 | 1.092054  | -2.513059 |
| H  | -1.613694 | 2.109284  | -2.469199 |
| H  | -0.675281 | 0.974434  | -3.448965 |
| H  | -0.498076 | 0.972414  | -1.705879 |
| C  | -4.260986 | 0.957898  | -1.007355 |
| H  | -4.668720 | 1.410509  | -1.899911 |
| C  | -3.760231 | -1.819871 | 3.201616  |
| H  | -4.661748 | -1.290959 | 3.513709  |
| H  | -3.343644 | -2.315151 | 4.080215  |
| H  | -4.055030 | -2.588512 | 2.487346  |
| C  | -4.919478 | 1.136916  | 0.203026  |
| H  | -5.829611 | 1.720370  | 0.244893  |
| C  | -1.686646 | -3.882646 | -2.227569 |
| H  | -1.782044 | -3.099583 | -2.981127 |
| H  | -2.420603 | -4.656034 | -2.457215 |
| H  | -0.700112 | -4.328661 | -2.330668 |
| C  | -1.736607 | -4.448954 | 0.231418  |
| H  | -0.722292 | -4.842071 | 0.206774  |
| H  | -2.425790 | -5.271912 | 0.036299  |
| H  | -1.932169 | -4.079491 | 1.239898  |
| C  | -3.451051 | -2.971385 | -0.761127 |
| H  | -3.763744 | -2.602585 | 0.211053  |
| H  | -4.018485 | -3.880822 | -0.962325 |
| H  | -3.736341 | -2.239075 | -1.511493 |
| C  | -0.598710 | 3.194613  | 0.648742  |
| F  | -0.149369 | 2.043158  | 1.369860  |
| C  | -1.942488 | 3.282624  | 0.394848  |
| C  | -2.355099 | 4.400560  | -0.325557 |
| C  | -1.429138 | 5.351020  | -0.741843 |
| C  | 0.365678  | 4.093378  | 0.271117  |
| C  | -0.078020 | 5.201656  | -0.445718 |
| H  | -2.637321 | 2.524253  | 0.725791  |
| H  | -3.404520 | 4.517737  | -0.557355 |
| H  | -1.761989 | 6.215323  | -1.299790 |
| H  | 1.407463  | 3.933099  | 0.510883  |
| H  | 0.638350  | 5.942596  | -0.772091 |
| Mg | 0.064884  | 0.171527  | 0.823490  |

|    |           |           |           |
|----|-----------|-----------|-----------|
| Mg | 0.004113  | -0.310537 | 0.350696  |
| F  | 0.783420  | -2.050886 | 0.175199  |
| C  | 1.363039  | -3.345292 | 0.044671  |
| C  | 2.471339  | -5.787129 | -0.216949 |
| N  | -1.769405 | 0.413836  | -0.009482 |
| N  | 1.092463  | 1.298416  | 0.115444  |
| C  | -1.960972 | 1.721469  | -0.178194 |
| C  | -0.878506 | 2.627557  | -0.191028 |
| H  | -1.187880 | 3.645436  | -0.318523 |
| C  | 0.520373  | 2.488787  | -0.075585 |
| C  | -2.698903 | -0.666077 | 0.102305  |
| C  | -3.153554 | -1.028898 | 1.387176  |
| C  | -3.348568 | 2.381854  | -0.408141 |
| C  | -2.966717 | -1.476330 | -1.014458 |
| C  | 2.465550  | 0.911015  | 0.050531  |
| C  | -3.733761 | -2.626256 | -0.828606 |
| H  | -3.966423 | -3.250967 | -1.681129 |
| C  | -4.565167 | 1.457918  | -0.260243 |
| H  | -4.562506 | 0.631644  | -0.963768 |
| H  | -5.459632 | 2.050272  | -0.456436 |
| H  | -4.660280 | 1.050108  | 0.743561  |
| C  | -4.209425 | -2.980014 | 0.422706  |
| H  | -4.810041 | -3.871566 | 0.544439  |
| C  | -2.441360 | -1.136521 | -2.397514 |
| H  | -1.878085 | -0.205881 | -2.319188 |
| C  | -1.448672 | -0.639827 | 3.190291  |
| H  | -1.488081 | -1.683736 | 3.502921  |
| H  | -1.159458 | -0.028110 | 4.045526  |
| H  | -0.612863 | -0.555145 | 2.479339  |
| C  | 3.123087  | 0.529884  | 1.233206  |
| C  | 1.295518  | 3.837324  | -0.095872 |
| C  | -3.912976 | -2.185827 | 1.522512  |
| H  | -4.286841 | -2.471042 | 2.495814  |
| C  | 2.480981  | 0.709446  | 2.597811  |
| H  | 1.504239  | 1.173088  | 2.445553  |
| C  | -2.786593 | -0.182816 | 2.594825  |
| H  | -2.655928 | 0.844236  | 2.254124  |
| C  | 2.317270  | 1.046061  | -2.486471 |
| H  | 1.659119  | 1.886867  | -2.270748 |
| C  | 3.065343  | 0.703744  | -1.209498 |
| C  | -3.363497 | 2.941506  | -1.846465 |
| H  | -2.584445 | 3.684513  | -2.006463 |
| H  | -4.328008 | 3.411627  | -2.044714 |
| H  | -3.222405 | 2.142933  | -2.576330 |
| C  | -3.551802 | 3.531968  | 0.601069  |
| H  | -3.476340 | 3.169624  | 1.627839  |
| H  | -4.549613 | 3.951579  | 0.467747  |
| H  | -2.837582 | 4.342656  | 0.477303  |
| C  | 2.265879  | -0.641844 | 3.293419  |
| H  | 1.696643  | -1.340489 | 2.673285  |
| H  | 1.728427  | -0.514363 | 4.234116  |
| H  | 3.218233  | -1.125050 | 3.515414  |

|   |           |           |           |
|---|-----------|-----------|-----------|
| C | -3.574806 | -0.904835 | -3.404263 |
| H | -4.163998 | -1.810994 | -3.552824 |
| H | -3.167501 | -0.610596 | -4.372934 |
| H | -4.252378 | -0.119267 | -3.070459 |
| C | -1.485726 | -2.224577 | -2.905433 |
| H | -0.660926 | -2.397858 | -2.211220 |
| H | -1.057446 | -1.943706 | -3.868418 |
| H | -2.006083 | -3.174583 | -3.035794 |
| C | -3.858817 | -0.166140 | 3.686421  |
| H | -4.829850 | 0.113338  | 3.277259  |
| H | -3.595258 | 0.557653  | 4.458623  |
| H | -3.964916 | -1.136730 | 4.172795  |
| C | 3.227908  | 1.471552  | -3.639132 |
| H | 3.905763  | 2.270755  | -3.337144 |
| H | 2.625546  | 1.835560  | -4.472353 |
| H | 3.829714  | 0.642213  | -4.013840 |
| C | 4.399591  | -0.024628 | 1.138989  |
| H | 4.925751  | -0.304326 | 2.042407  |
| C | 1.421567  | -0.122984 | -2.914699 |
| H | 2.009041  | -1.026409 | -3.086184 |
| H | 0.880798  | 0.114523  | -3.831877 |
| H | 0.667516  | -0.350695 | -2.158188 |
| C | 4.338768  | 0.146748  | -1.252643 |
| H | 4.822148  | -0.005651 | -2.207233 |
| C | 3.288527  | 1.655921  | 3.494059  |
| H | 4.279775  | 1.251752  | 3.704377  |
| H | 2.779673  | 1.805063  | 4.447808  |
| H | 3.419099  | 2.630601  | 3.023916  |
| C | 5.008914  | -0.213006 | -0.089691 |
| H | 6.003987  | -0.634244 | -0.145458 |
| C | 0.923500  | 4.655814  | -1.348350 |
| H | 1.164643  | 4.109816  | -2.261631 |
| H | 1.498520  | 5.582630  | -1.353342 |
| H | -0.129860 | 4.924296  | -1.385945 |
| C | 0.875148  | 4.610896  | 1.174637  |
| H | -0.193307 | 4.815029  | 1.200243  |
| H | 1.404896  | 5.563954  | 1.211678  |
| H | 1.133123  | 4.047782  | 2.073474  |
| C | 2.826826  | 3.738199  | -0.068542 |
| H | 3.200231  | 3.201465  | 0.798719  |
| H | 3.225223  | 4.752371  | -0.020940 |
| H | 3.235989  | 3.271032  | -0.960434 |
| C | 0.501093  | -4.410570 | 0.018376  |
| C | 2.729404  | -3.390789 | -0.052054 |
| C | 1.089323  | -5.666159 | -0.116458 |
| C | 3.286580  | -4.660311 | -0.185688 |
| H | -0.568600 | -4.273404 | 0.093044  |
| H | 3.326043  | -2.488915 | -0.025596 |
| H | 0.460550  | -6.545204 | -0.143686 |
| H | 4.360098  | -4.760767 | -0.265909 |
| H | 2.915989  | -6.767073 | -0.321646 |

## tBuBDIMg-ClPh linear geometry, Dispersion

|    |           |           |           |
|----|-----------|-----------|-----------|
| Mg | 0.091908  | -0.129208 | -0.725828 |
| Cl | -1.804770 | -1.626223 | -0.331883 |
| C  | -3.192771 | -2.721748 | -0.043590 |
| C  | -5.316629 | -4.355922 | 0.419851  |
| N  | 1.937202  | -0.293559 | -0.078634 |
| N  | -0.317655 | 1.707106  | -0.150803 |
| C  | 2.630908  | 0.804660  | 0.218750  |
| C  | 2.009179  | 2.070882  | 0.305474  |
| H  | 2.701162  | 2.858871  | 0.523475  |
| C  | 0.680644  | 2.526360  | 0.191878  |
| C  | 2.367273  | -1.649173 | -0.209870 |
| C  | 2.617760  | -2.128947 | -1.513386 |
| C  | 4.161080  | 0.835172  | 0.497425  |
| C  | 2.343832  | -2.522846 | 0.887927  |
| C  | -1.729628 | 1.899425  | -0.049384 |
| C  | 2.644637  | -3.866974 | 0.666032  |
| H  | 2.650566  | -4.551932 | 1.503691  |
| C  | 4.918426  | -0.479172 | 0.260295  |
| H  | 4.598794  | -1.283607 | 0.913329  |
| H  | 5.974399  | -0.295653 | 0.461891  |
| H  | 4.840598  | -0.825613 | -0.768364 |
| C  | 2.937442  | -4.342201 | -0.600079 |
| H  | 3.176747  | -5.386828 | -0.747535 |
| C  | 1.982700  | -2.054845 | 2.285242  |
| H  | 1.818603  | -0.977948 | 2.243816  |
| C  | 1.083771  | -0.732329 | -2.985380 |
| H  | 0.358133  | -1.422316 | -2.523856 |
| H  | 0.843027  | -0.778492 | -4.047038 |
| H  | 0.898460  | 0.316384  | -2.715723 |
| C  | -2.492956 | 1.939408  | -1.228748 |
| C  | 0.521203  | 4.065365  | 0.369672  |
| C  | 2.913000  | -3.475828 | -1.685863 |
| H  | 3.133127  | -3.860063 | -2.671028 |
| C  | -1.841010 | 2.043324  | -2.597163 |
| H  | -0.760973 | 2.097683  | -2.442837 |
| C  | 2.548197  | -1.165463 | -2.690181 |
| H  | 3.089055  | -0.263145 | -2.400154 |
| C  | -1.527159 | 1.758111  | 2.487857  |
| H  | -0.608192 | 2.316297  | 2.314647  |
| C  | -2.352604 | 1.823417  | 1.213566  |
| C  | 4.369403  | 1.239700  | 1.971278  |
| H  | 3.955993  | 2.222711  | 2.189186  |
| H  | 5.436998  | 1.263039  | 2.195715  |
| H  | 3.900092  | 0.521286  | 2.643907  |
| C  | 4.825367  | 1.880331  | -0.426556 |
| H  | 4.631322  | 1.653684  | -1.476700 |
| H  | 5.904885  | 1.855122  | -0.274077 |
| H  | 4.492547  | 2.897623  | -0.235528 |
| C  | -2.142767 | 0.814094  | -3.464762 |
| H  | -1.875766 | -0.122181 | -2.966973 |

|   |           |           |           |
|---|-----------|-----------|-----------|
| H | -1.601526 | 0.862967  | -4.411085 |
| H | -3.207337 | 0.749119  | -3.693299 |
| C | 3.103003  | -2.319024 | 3.298574  |
| H | 3.283156  | -3.388116 | 3.420860  |
| H | 2.830943  | -1.916155 | 4.275567  |
| H | 4.041754  | -1.857560 | 2.993605  |
| C | 0.675947  | -2.711596 | 2.751896  |
| H | -0.138470 | -2.527569 | 2.050195  |
| H | 0.376625  | -2.322879 | 3.726109  |
| H | 0.795232  | -3.792244 | 2.845397  |
| C | 3.199649  | -1.692041 | -3.968119 |
| H | 4.232617  | -1.989368 | -3.788833 |
| H | 3.201973  | -0.913523 | -4.731993 |
| H | 2.663623  | -2.551374 | -4.374472 |
| C | -2.214972 | 2.397559  | 3.695258  |
| H | -2.558523 | 3.408557  | 3.472501  |
| H | -1.516581 | 2.453713  | 4.531196  |
| H | -3.074467 | 1.815858  | 4.032185  |
| C | -3.883175 | 1.898927  | -1.129557 |
| H | -4.483008 | 1.942753  | -2.029363 |
| C | -1.113688 | 0.316830  | 2.804430  |
| H | -1.987880 | -0.325885 | 2.922012  |
| H | -0.533831 | 0.277008  | 3.727802  |
| H | -0.489868 | -0.100629 | 2.014910  |
| C | -3.741932 | 1.786622  | 1.261841  |
| H | -4.239696 | 1.738472  | 2.219996  |
| C | -2.246868 | 3.328892  | -3.328465 |
| H | -3.318301 | 3.344802  | -3.532777 |
| H | -1.723728 | 3.406998  | -4.283077 |
| H | -2.007517 | 4.212711  | -2.737379 |
| C | -4.508063 | 1.819576  | 0.102902  |
| H | -5.588289 | 1.800697  | 0.165901  |
| C | 1.185671  | 4.542406  | 1.675978  |
| H | 0.742756  | 4.054976  | 2.545506  |
| H | 1.031673  | 5.616861  | 1.782902  |
| H | 2.258203  | 4.363203  | 1.701142  |
| C | 1.231877  | 4.715694  | -0.840309 |
| H | 2.290006  | 4.465089  | -0.881583 |
| H | 1.140833  | 5.800945  | -0.774863 |
| H | 0.770888  | 4.396083  | -1.776866 |
| C | -0.916033 | 4.603747  | 0.378009  |
| H | -1.466639 | 4.351177  | -0.523159 |
| H | -0.862931 | 5.691694  | 0.434040  |
| H | -1.490520 | 4.262255  | 1.234683  |
| C | -4.422537 | -2.128300 | 0.155229  |
| C | -2.958790 | -4.080789 | -0.022001 |
| C | -5.498843 | -2.977984 | 0.390390  |
| C | -4.055412 | -4.903748 | 0.215802  |
| H | -4.534648 | -1.053786 | 0.131353  |
| H | -1.970048 | -4.485056 | -0.179361 |
| H | -6.480333 | -2.552946 | 0.550990  |
| H | -3.914234 | -5.975691 | 0.240812  |

|   |           |           |          |
|---|-----------|-----------|----------|
| H | -6.160897 | -5.006039 | 0.603737 |
|---|-----------|-----------|----------|

103

tBuBDIMg-BrPh linear geometry, Dispersion

|    |           |           |           |
|----|-----------|-----------|-----------|
| Mg | -0.224957 | -0.075490 | -0.816729 |
| Br | 2.130612  | -1.215552 | -0.355014 |
| C  | 3.858664  | -2.051905 | -0.016299 |
| C  | 6.283466  | -3.179308 | 0.483818  |
| N  | -0.148964 | 1.773274  | -0.107422 |
| N  | -2.014171 | -0.598341 | -0.200371 |
| C  | -1.294296 | 2.411629  | 0.120166  |
| C  | -2.530067 | 1.724016  | 0.141038  |
| H  | -3.365171 | 2.376337  | 0.297781  |
| C  | -2.903027 | 0.369375  | 0.062210  |
| C  | 1.188125  | 2.271989  | -0.166023 |
| C  | 1.712082  | 2.565911  | -1.443300 |
| C  | -1.424480 | 3.940584  | 0.378988  |
| C  | 2.014996  | 2.253744  | 0.968791  |
| C  | -2.158403 | -2.004474 | 0.014433  |
| C  | 3.364316  | 2.568096  | 0.803132  |
| H  | 4.013073  | 2.579152  | 1.669145  |
| C  | -0.140312 | 4.767218  | 0.221272  |
| H  | 0.645955  | 4.479835  | 0.909315  |
| H  | -0.388714 | 5.809315  | 0.425728  |
| H  | 0.261594  | 4.723653  | -0.788746 |
| C  | 3.890442  | 2.867134  | -0.441370 |
| H  | 4.939138  | 3.112626  | -0.545514 |
| C  | 1.496908  | 1.909817  | 2.354700  |
| H  | 0.454299  | 1.605415  | 2.254000  |
| C  | 0.323726  | 1.138546  | -3.044808 |
| H  | 1.046596  | 0.378254  | -2.717987 |
| H  | 0.256726  | 1.008090  | -4.124852 |
| H  | -0.695420 | 0.930278  | -2.690205 |
| C  | -2.182056 | -2.860800 | -1.100241 |
| C  | -4.437158 | 0.131341  | 0.209348  |
| C  | 3.064865  | 2.863150  | -1.558615 |
| H  | 3.485735  | 3.106160  | -2.522998 |
| C  | -2.195910 | -2.287825 | -2.505542 |
| H  | -2.556933 | -1.260118 | -2.433159 |
| C  | 0.790784  | 2.565781  | -2.658399 |
| H  | -0.106321 | 3.121083  | -2.378901 |
| C  | -2.015019 | -1.605589 | 2.528398  |
| H  | -2.395044 | -0.627550 | 2.240048  |
| C  | -2.108496 | -2.521832 | 1.321921  |
| C  | -1.941767 | 4.138081  | 1.818922  |
| H  | -2.918947 | 3.683010  | 1.968895  |
| H  | -2.028676 | 5.204565  | 2.032476  |
| H  | -1.255134 | 3.703799  | 2.545480  |
| C  | -2.438955 | 4.540224  | -0.620544 |
| H  | -2.133359 | 4.350512  | -1.651256 |
| H  | -2.480715 | 5.620783  | -0.479262 |
| H  | -3.447725 | 4.155157  | -0.493572 |

|   |           |           |           |
|---|-----------|-----------|-----------|
| C | -0.771865 | -2.254457 | -3.075867 |
| H | -0.044826 | -1.794721 | -2.389150 |
| H | -0.721075 | -1.716017 | -4.023119 |
| H | -0.393354 | -3.265896 | -3.230433 |
| C | 1.550503  | 3.119919  | 3.298556  |
| H | 2.580638  | 3.443137  | 3.458050  |
| H | 1.129869  | 2.858862  | 4.271127  |
| H | 0.994074  | 3.970665  | 2.909681  |
| C | 2.272954  | 0.741743  | 2.977702  |
| H | 2.251284  | -0.143404 | 2.344593  |
| H | 1.843923  | 0.475578  | 3.944269  |
| H | 3.317549  | 1.008246  | 3.145193  |
| C | 1.385138  | 3.260546  | -3.883411 |
| H | 1.713959  | 4.271423  | -3.643651 |
| H | 0.633362  | 3.329812  | -4.670415 |
| H | 2.237388  | 2.712588  | -4.289250 |
| C | -2.849673 | -2.079513 | 3.720226  |
| H | -3.887079 | -2.259062 | 3.435111  |
| H | -2.840537 | -1.322506 | 4.505951  |
| H | -2.457463 | -3.000246 | 4.154015  |
| C | -2.170464 | -4.236941 | -0.890818 |
| H | -2.203908 | -4.909003 | -1.737526 |
| C | -0.548510 | -1.410672 | 2.929155  |
| H | -0.095934 | -2.358565 | 3.226346  |
| H | -0.463438 | -0.714414 | 3.764807  |
| H | 0.038407  | -1.009579 | 2.102199  |
| C | -2.101032 | -3.904808 | 1.483538  |
| H | -2.071787 | -4.322527 | 2.480413  |
| C | -3.131727 | -3.025290 | -3.465865 |
| H | -2.797562 | -4.045676 | -3.656557 |
| H | -3.171987 | -2.509332 | -4.426547 |
| H | -4.143698 | -3.073090 | -3.063606 |
| C | -2.133329 | -4.760084 | 0.392161  |
| H | -2.133119 | -5.831490 | 0.542120  |
| C | -4.940739 | 0.688326  | 1.554617  |
| H | -4.474551 | 0.172505  | 2.394130  |
| H | -6.018331 | 0.534172  | 1.626630  |
| H | -4.750335 | 1.753699  | 1.666969  |
| C | -5.123674 | 0.888017  | -0.952958 |
| H | -4.952950 | 1.961522  | -0.918248 |
| H | -6.200026 | 0.717534  | -0.906095 |
| H | -4.767988 | 0.520172  | -1.917353 |
| C | -4.914931 | -1.323995 | 0.107933  |
| H | -4.619878 | -1.794718 | -0.826820 |
| H | -6.005186 | -1.317706 | 0.139912  |
| H | -4.568201 | -1.946867 | 0.926702  |
| C | 4.932444  | -1.203438 | 0.160204  |
| C | 3.921057  | -3.428126 | 0.044360  |
| C | 6.166008  | -1.796066 | 0.414722  |
| C | 5.169251  | -3.989507 | 0.300402  |
| H | 4.817476  | -0.130760 | 0.105184  |
| H | 3.045205  | -4.043052 | -0.096838 |



|   |          |           |          |
|---|----------|-----------|----------|
| H | 7.032986 | -1.165428 | 0.558615 |
| H | 5.260026 | -5.065902 | 0.355760 |
| H | 7.247099 | -3.627969 | 0.682305 |

103

tBuBDIMg-IPh linear geometry, Dispersion

|    |           |           |           |
|----|-----------|-----------|-----------|
| Mg | -0.377908 | 0.060890  | -0.668325 |
| I  | 2.379671  | 0.816540  | -0.239628 |
| C  | 4.423065  | 1.376482  | 0.078040  |
| C  | 7.033679  | 2.044754  | 0.505829  |
| N  | -2.058943 | 0.884769  | -0.080402 |
| N  | -0.698162 | -1.802560 | -0.136941 |
| C  | -3.117510 | 0.113661  | 0.169723  |
| C  | -3.005571 | -1.292044 | 0.260162  |
| H  | -3.944508 | -1.772202 | 0.447841  |
| C  | -1.932863 | -2.201570 | 0.177811  |
| C  | -1.961090 | 2.306465  | -0.188732 |
| C  | -1.949181 | 2.859387  | -1.487194 |
| C  | -4.566093 | 0.641823  | 0.379878  |
| C  | -1.687743 | 3.100095  | 0.935603  |
| C  | 0.549514  | -2.489997 | -0.015741 |
| C  | -1.471482 | 4.464508  | 0.740583  |
| H  | -1.276663 | 5.095745  | 1.597490  |
| C  | -4.782718 | 2.142273  | 0.136527  |
| H  | -4.229764 | 2.774017  | 0.822534  |
| H  | -5.842935 | 2.352619  | 0.281941  |
| H  | -4.529479 | 2.440904  | -0.878807 |
| C  | -1.501094 | 5.027596  | -0.522825 |
| H  | -1.338144 | 6.089507  | -0.649279 |
| C  | -1.599088 | 2.519181  | 2.334527  |
| H  | -1.829942 | 1.455693  | 2.269249  |
| C  | -0.941418 | 1.023549  | -2.931374 |
| H  | -0.046591 | 1.387576  | -2.396885 |
| H  | -0.624879 | 1.016427  | -3.973966 |
| H  | -1.164676 | -0.029991 | -2.713911 |
| C  | 1.262809  | -2.807727 | -1.184811 |
| C  | -2.346998 | -3.691989 | 0.352275  |
| C  | -1.729261 | 4.223551  | -1.632414 |
| H  | -1.739983 | 4.672360  | -2.614809 |
| C  | 0.625940  | -2.708627 | -2.560999 |
| H  | -0.399326 | -2.357618 | -2.423838 |
| C  | -2.167668 | 1.949121  | -2.687630 |
| H  | -3.009290 | 1.297250  | -2.447730 |
| C  | 0.365677  | -2.287189 | 2.518386  |
| H  | -0.685654 | -2.494446 | 2.323735  |
| C  | 1.141496  | -2.628991 | 1.256829  |
| C  | -4.983747 | 0.334295  | 1.832409  |
| H  | -4.970343 | -0.732819 | 2.046313  |
| H  | -5.996282 | 0.702090  | 2.006141  |
| H  | -4.320486 | 0.827557  | 2.543151  |
| C  | -5.515239 | -0.086805 | -0.598063 |
| H  | -5.199825 | 0.061664  | -1.632604 |

|   |           |           |           |
|---|-----------|-----------|-----------|
| H | -6.519259 | 0.325753  | -0.493203 |
| H | -5.581076 | -1.156921 | -0.417510 |
| C | 1.360083  | -1.708494 | -3.463271 |
| H | 1.449820  | -0.721555 | -3.002783 |
| H | 0.841601  | -1.594299 | -4.416723 |
| H | 2.375865  | -2.044453 | -3.675583 |
| C | -2.605346 | 3.159425  | 3.298719  |
| H | -2.393492 | 4.219556  | 3.445518  |
| H | -2.553571 | 2.674378  | 4.274896  |
| H | -3.628367 | 3.073635  | 2.933862  |
| C | -0.172989 | 2.657540  | 2.885203  |
| H | 0.561423  | 2.205350  | 2.217807  |
| H | -0.088908 | 2.174265  | 3.859559  |
| H | 0.096062  | 3.707823  | 3.008643  |
| C | -2.521373 | 2.688361  | -3.977308 |
| H | -3.388582 | 3.332781  | -3.835028 |
| H | -2.761038 | 1.971118  | -4.763315 |
| H | -1.694076 | 3.304311  | -4.333642 |
| C | 0.768695  | -3.132206 | 3.728303  |
| H | 0.746277  | -4.198158 | 3.498198  |
| H | 0.079197  | -2.948930 | 4.553352  |
| H | 1.770113  | -2.885026 | 4.084096  |
| C | 2.580876  | -3.245543 | -1.064540 |
| H | 3.139917  | -3.502419 | -1.954868 |
| C | 0.465072  | -0.794977 | 2.849783  |
| H | 1.502156  | -0.492831 | 3.002031  |
| H | -0.096167 | -0.564396 | 3.756493  |
| H | 0.048837  | -0.179598 | 2.051775  |
| C | 2.458789  | -3.067478 | 1.324584  |
| H | 2.931600  | -3.184848 | 2.289413  |
| C | 0.537810  | -4.079148 | -3.244846 |
| H | 1.531165  | -4.492356 | -3.425436 |
| H | 0.031052  | -3.993536 | -4.207622 |
| H | -0.013660 | -4.793635 | -2.634176 |
| C | 3.181736  | -3.366853 | 0.176065  |
| H | 4.203480  | -3.714981 | 0.254250  |
| C | -3.178752 | -3.886126 | 1.635251  |
| H | -2.616514 | -3.584012 | 2.519911  |
| H | -3.426457 | -4.942789 | 1.743388  |
| H | -4.114362 | -3.331591 | 1.627069  |
| C | -3.207102 | -4.049347 | -0.882174 |
| H | -4.100873 | -3.432719 | -0.954475 |
| H | -3.517393 | -5.093410 | -0.818906 |
| H | -2.633653 | -3.924624 | -1.802622 |
| C | -1.201831 | -4.712422 | 0.405090  |
| H | -0.570216 | -4.684372 | -0.477353 |
| H | -1.645274 | -5.707507 | 0.457663  |
| H | -0.569215 | -4.592773 | 1.280375  |
| C | 5.322159  | 0.351624  | 0.304270  |
| C | 4.757167  | 2.716479  | 0.054348  |
| C | 6.650401  | 0.709171  | 0.520840  |
| C | 6.093481  | 3.041275  | 0.274400  |

|   |          |           |           |
|---|----------|-----------|-----------|
| H | 5.011645 | -0.682885 | 0.314328  |
| H | 4.020271 | 3.484593  | -0.124817 |
| H | 7.380927 | -0.068167 | 0.701208  |
| H | 6.389559 | 4.081738  | 0.262871  |
| H | 8.068276 | 2.309919  | 0.675244  |

## 2. References

- S1 Rigaku Oxford Diffraction, 2019, CrysAlisPro Software system, version 1.171.40.67a, Rigaku Corporation, Oxford, UK.
- S2 O. V. Dolomanov, L. J. Bourhis, R.J. Gildea, J. A. K. Howard and H. Puschmann, *J. Appl. Cryst.*, 2009, **42**, 339–341.
- S3 A: G. M. Sheldrick, *Acta Cryst. A*, 2015, **71**, 3–8; B: G. M. Sheldrick, *Acta Cryst. C*, 2015, **71**, 3–8.
- S4 A. Higelin, I. Krossing, *CSD Commun. Private Commun.* 2012, CCDC 912659.
- S5 L. O. Müller, D. Himmel, J. Stauffer, G. Steinfeld, J. Slattery, G. Santiso-Quiñones, V. Brecht, I. Krossing, *Angew. Chemie - Int. Ed.* 2008, **47**, 7659–7663.
- S6 F. Basuli, H. Aneetha, J. C. Huffman, D. J. Mindiola, *J. Am. Chem. Soc.* 2005, **127**, 17992–17993.
- S7 M. W. Bouwkamp, P. H. M. Budzelaar, J. Gercama, I. Del Hierro Morales, J. De Wolf, A. Meetsma, S. I. Troyanov, J. H. Teuben, B. Hessen, *J. Am. Chem. Soc.* 2005, **127**, 14310–14319.
- S8 M. W. Bouwkamp, J. De Wolf, I. Del Hierro Morales, J. Gercama, A. Meetsma, S. I. Troyanov, B. Hessen, J. H. Teuben, *J. Am. Chem. Soc.* 2002, **124**, 12956–12957.
- S9 P. G. Williard, Q.-Y. Liu, *J. Org. Chem.* 1994, **59**, 1596–1597.
- S10 P. Valerga, M. C. Puerta, F. E. Fernandez, *CSD Commun. Private Commun.* 2016.
- S11 M. Schleep, C. Hettich, J. Velázquez Rojas, D. Kratzert, T. Ludwig, K. Lieberth, I. Krossing, *Angew. Chemie - Int. Ed.* 2017, **56**, 2880–2884.
- S12 X. Y. Liu, K. Venkatesan, H. W. Schmalle, H. Berke, *Organometallics* 2004, **23**, 3153–3163.
- S13 A. M. Chapman, M. F. Haddow, D. F. Wass, *J. Am. Chem. Soc.* 2011, **133**, 18463–18478.
- S14 O. J. Metters, S. J. K. Forrest, H. A. Sparkes, I. Manners, D. F. Wass, *J. Am. Chem. Soc.* 2016, **138**, 1994–2003.
- S15 P. Ren, S. D. Pike, I. Pernik, A. S. Weller, M. C. Willis, *Organometallics* 2015, **34**, 711–723.
- S16 A. V. Korolev, F. Delpech, S. Dagorne, I. A. Guzei, R. F. Jordan, *Organometallics* 2001, **20**, 3367–3369.
- S17 A. V. Korolev, E. Ihara, I. A. Guzei, V. G. Young, R. F. Jordan, *J. Am. Chem. Soc.* 2001, **123**, 8291–8309.
- S18 M. D. Butts, B. L. Scott, G. J. Kubas, *J. Am. Chem. Soc.* 1996, **118**, 11831–11843.
- S19 L. P. Press, B. J. McCulloch, W. Gu, C. H. Chen, B. M. Foxman, O. V. Ozerov, *Chem. Commun.* 2015, **51**, 14034–14037.
- S20 J. Powell, M. Horvath, A. Lough, *J. Organomet. Chem.* 1993, **456**, C27–C28.
- S21 J. Powell, M. J. Horvath, A. Lough, A. Phillips, J. Brunet, *J. Chem. Soc. Dalt. Trans.* 1998, 637–646.

- S22 M. J. Frisch, G. W. Trucks, H. B. Schlegel, G. E. Scuseria, M. A. Robb, J. R. Cheeseman, G. Scalmani, V. Barone, G. A. Petersson, H. Nakatsuji, X. Li, M. Caricato, A. V. Marenich, J. Bloino, B. G. Janesko, R. Gomperts, B. Mennucci, H. P. Hratchian, J. V. Ortiz, A. F. Izmaylov, J. L. Sonnenberg, D. Williams-Young, F. Ding, F. Lipparini, F. Egidi, J. Goings, B. Peng, A. Petrone, T. Henderson, D. Ranasinghe, V. G. Zakrzewski, J. Gao, N. Rega, G. Zheng, W. Liang, M. Hada, M. Ehara, K. Toyota, R. Fukuda, J. Hasegawa, M. Ishida, T. Nakajima, Y. Honda, O. Kitao, H. Nakai, T. Vreven, K. Throssell, J. A. Montgomery, J. E. Peralta, F. Ogliaro, M. J. Bearpark, J. J. Heyd, E. N. Brothers, K. N. Kudin, V. N. Staroverov, T. A. Keith, R. Kobayashi, J. Normand, K. Raghavachari, A. P. Rendell, J. C. Burant, S. S. Iyengar, J. Tomasi, M. Cossi, J. M. Millam, M. Klene, C. Adamo, R. Cammi, J. W. Ochterski, R. L. Martin, K. Morokuma, O. Farkas, J. B. Foresman, D. J. Fox, Gaussian 16 Rev. A.03, Wallingford CT, 2016.
- S23 A. D. Becke, *J. Chem. Phys.*, 1993, **98**, 5648-5652; C. Lee, W. Yang, R. G. Parr, *Phys. Rev. B*, 1988, **37**, 785-789; F. Weigend, R. Ahlrichs, *Phys. Chem. Chem. Phys.* 2005, **7**, 3297-305; F. Weigend, *Phys. Chem. Chem. Phys.*, 2006, **8** 1057-1065.
- S24 S. Grimme, S. Ehrlich, L. Goerigk, *J. Comp. Chem.* 2011, **32**, 1456 – 1465.
- S25 E. F. Silva, H. F. Svendsen, K. M. Merz, *J. Phys. Chem. A* 2009, 6404–6409.
- S26 N. van Eikema Hommes, Molecule, Erlangen, 2018.
- S27 R. F. W. Bader, *Chem. Rev.* 1991, **91**, 893-928.
- S28 T. A. Keith, *AIMAll (Version 17.01.25)*, TK Gristmill Software, Overland Park KS USA, 2017.

## Author Contributions

A.F. and J.P. conducted the experimental work. DFT calculations were done by J.E.; crystal structure determination was done by J.P and J.L. The manuscript was written by S.H. and A.F. while S.H., A.G and N.v.E.-H. were responsible for supervision and discussion.
